# Supplementary material for: Comparative Transcriptome Analysis Identifies Desmoglein-3 as a Potential Oncogene in ORAL Cancer
Source: Preprints.org preprint supplement (doi:10.20944/preprints202309.1615.v1), 2023-09-25
Supplement: Supplementary file 1 [file supplementary]

## Sheet: Table S1
ID	log2FoldChange	pvalue	padj	D1	D2	V1	V2	Gene.name
ENSG00000104327	1.04907	2.86e-12	4.61e-08	1872.35	1779.14	867.163	897.727	CALB1
ENSG00000167754	-1.02049	1.09e-10	8.8e-07	652.515	650.138	1266.24	1376.52	KLK5
ENSG00000128591	-1.14635	7.88e-10	4.24e-06	270.15	314.583	673.379	619.662	FLNC
ENSG00000105825	1.02636	4.62e-09	1.68e-05	1151.25	1017.15	584.893	479.709	TFPI2
ENSG00000167772	1.10145	5.2e-09	1.68e-05	805.254	709.56	312.356	394.079	ANGPTL4
ENSG00000137745	1.2119	7.6e-09	2.05e-05	400.029	378.665	180.512	155.606	MMP13
ENSG00000102837	1.74063	2.1e-08	4.85e-05	150.66	138.65	44.243	42.3543	OLFM4
ENSG00000163207	-0.800439	7.43e-08	0.00014962	1707.14	1526.31	2711.21	2921.53	IVL
ENSG00000204262	-0.913999	8.34e-08	0.00014962	712.78	916.952	1498.95	1569.87	COL5A2
ENSG00000185432	0.8549	1.31e-07	0.000211232	1060.86	1102.21	568.965	627.028	METTL7A
ENSG00000104368	0.648789	7.17e-07	0.00105275	98477.9	96619	61689.8	62746.1	PLAT
ENSG00000152661	1.42399	1.04e-06	0.00133501	218.198	149.136	69.904	67.2145	GJA1
ENSG00000168542	0.981713	1.08e-06	0.00133501	386.522	396.142	194.669	201.643	COL3A1
ENSG00000122884	0.726855	1.31e-06	0.00151282	3187.77	2728.72	1790.07	1785.33	P4HA1
ENSG00000204287	0.957499	1.52e-06	0.00163757	422.888	440.416	207.057	237.552	HLA-DRA
ENSG00000129521	0.847367	6.84e-06	0.00689905	2412.64	1638.16	1157.4	1094.77	EGLN3
ENSG00000000971	1.43163	1.07e-05	0.0101289	181.832	123.503	68.1343	45.1165	CFH
ENSG00000186847	-0.677915	1.51e-05	0.0134963	6102.27	5170.81	8192.04	9844.62	KRT14
ENSG00000126016	1.57769	1.63e-05	0.0138391	87.2791	101.366	32.7398	30.3846	AMOT
ENSG00000137975	0.80614	1.89e-05	0.0152484	623.422	586.057	382.26	309.371	CLCA2
ENSG00000198910	-0.632581	1.99e-05	0.0152778	1624.02	1706.9	2728.03	2435.37	L1CAM
ENSG00000163209	-0.865731	2.76e-05	0.0202141	687.843	711.89	988.389	1562.51	SPRR3
ENSG00000104419	0.696631	3.37e-05	0.0236757	20492.9	14793.6	10846.6	10926.5	NDRG1
ENSG00000121858	0.648093	4.52e-05	0.0280394	1975.21	2246.36	1452.06	1241.17	TNFSF10
ENSG00000134013	0.678929	4.5e-05	0.0280394	2899.95	2232.38	1551.16	1655.5	LOXL2
ENSG00000154734	-1.084	4.37e-05	0.0280394	83.123	97.8703	204.403	178.625	ADAMTS1
ENSG00000099840	1.15156	5.62e-05	0.0335656	167.285	146.805	77.8677	63.5315	IZUMO4
ENSG00000152952	0.607918	6.94e-05	0.0399917	1335.16	1348.05	859.2	901.41	PLOD2
ENSG00000124785	0.76597	7.31e-05	0.0406851	521.597	453.233	271.652	302.005	NRN1
ENSG00000137801	-0.695497	8.57e-05	0.0460909	7371.97	10381.2	13219.8	15528.4	THBS1
ENSG00000130822	0.983926	0.000111605	0.0581065	364.702	260.987	187.59	128.904	PNCK
ENSG00000112299	0.817919	0.000161083	0.0812463	408.342	600.038	281.386	290.035	VNN1
ENSG00000176171	0.674188	0.00017157	0.0839132	877.987	707.229	485.788	508.252	BNIP3
ENSG00000041982	-0.580826	0.000207726	0.0986086	1076.44	1160.46	1559.12	1786.25	TNC
ENSG00000143324	0.589929	0.000274662	0.126659	1235.42	1464.56	919.37	873.788	XPR1
ENSG00000107159	1.52291	0.000321119	0.143968	121.567	57.091	27.4307	34.9883	CA9
ENSG00000109046	0.619722	0.00034244	0.145447	1879.62	2271.99	1509.57	1191.45	WSB1
ENSG00000130821	0.597717	0.000334775	0.145447	5697.04	4224.73	3300.53	3256.68	SLC6A8
ENSG00000139645	-0.529373	0.000351533	0.14548	1153.33	1172.11	1702.47	1653.66	ANKRD52
ENSG00000151882	0.909484	0.000409278	0.165144	259.759	378.665	138.038	201.643	CCL28
ENSG00000072657	-1.15115	0.00048371	0.185883	43.6396	83.8888	137.153	144.557	TRHDE
ENSG00000154263	0.584121	0.000482954	0.185883	766.81	767.816	529.147	494.441	ABCA10
ENSG00000134757	0.567195	0.000554863	0.203534	2074.96	2580.75	1472.41	1669.31	DSG3
ENSG00000182836	0.843159	0.000547685	0.203534	217.159	301.767	142.463	146.399	PLCXD3
ENSG00000144476	0.546888	0.000615214	0.220657	1436.99	1426.11	1061.83	897.727	ACKR3
ENSG00000081052	0.635298	0.000667909	0.234349	547.573	661.79	408.806	369.219	COL4A4
ENSG00000131016	-0.664446	0.000722805	0.243043	304.438	312.253	540.65	436.434	AKAP12
ENSG00000161849	-2.17209	0.00071559	0.243043	7.27326	8.15586	37.1641	32.2261	KRT84
ENSG00000184368	0.959685	0.000745444	0.24554	167.285	136.319	72.5586	83.7879	MAP7D2
ENSG00000143153	0.460842	0.000793249	0.25104	4509.42	4495.04	3328.85	3213.4	ATP1B1
ENSG00000169031	0.931416	0.000789915	0.25104	233.783	422.94	146.002	197.96	COL4A3
ENSG00000162433	0.685289	0.000831037	0.257941	421.849	357.693	227.409	257.809	AK4
ENSG00000143337	0.531917	0.000883262	0.268978	981.89	1054.44	720.277	687.797	TOR1AIP1
ENSG00000125912	-0.525648	0.000932912	0.278837	1182.42	1147.65	1530.81	1824	NCLN
ENSG00000149948	-0.874688	0.00110652	0.324715	101.826	83.8888	170.778	170.338	HMGA2
ENSG00000169469	-0.555079	0.00113134	0.32607	1725.84	1466.89	2061.73	2630.57	SPRR1B
ENSG00000115758	-0.56915	0.00122183	0.345971	855.128	665.285	1073.34	1184.08	ODC1
ENSG00000109861	0.568585	0.0012838	0.357251	733.56	828.402	484.019	569.021	CTSC
ENSG00000047457	0.519733	0.00134681	0.368432	1118	985.694	722.931	744.883	CP
ENSG00000110195	0.547204	0.00144869	0.377507	639.008	644.313	435.351	442.879	FOLR1
ENSG00000136943	-0.510344	0.00145534	0.377507	1084.75	1011.33	1613.99	1371.91	CTSV
ENSG00000149573	0.463728	0.00155721	0.377507	3931.72	4478.73	2929.77	3168.29	MPZL2
ENSG00000163347	0.447239	0.00153849	0.377507	2886.45	2913.97	2076.77	2177.56	CLDN1
ENSG00000177606	-0.518662	0.00148197	0.377507	7364.7	5824.45	10260.8	8635.68	JUN
ENSG00000184564	0.545863	0.00153813	0.377507	1130.47	1445.92	913.176	850.769	SLITRK6
ENSG00000196535	-0.507822	0.0015671	0.377507	1027.61	1242.02	1575.94	1649.98	MYO18A
ENSG00000269516	1.07499	0.00156356	0.377507	125.724	167.778	92.9104	46.0373	CYP4F23P
ENSG00000131473	-0.532832	0.0016491	0.391419	839.542	932.098	1150.32	1412.42	ACLY
ENSG00000115221	0.467678	0.00169183	0.39574	4949.97	5914.16	4007.53	3847.8	ITGB6
ENSG00000088854	0.787638	0.00183263	0.406382	192.222	178.264	109.723	104.965	C20orf194
ENSG00000127954	0.571485	0.00181189	0.406382	2700.46	3627.03	1864.4	2393.02	STEAP4
ENSG00000172379	1.00856	0.00183558	0.406382	110.138	111.852	46.8976	63.5315	ARNT2
ENSG00000197930	0.428029	0.00183803	0.406382	4301.61	4195.61	3166.03	3149.87	ERO1A
ENSG00000121005	0.701009	0.00187459	0.408155	263.915	328.565	169.008	195.198	CRISPLD1
ENSG00000134215	0.646225	0.00189663	0.408155	316.906	349.537	222.985	202.564	VAV3
ENSG00000161638	0.425768	0.00197061	0.408436	4187.32	4108.22	3058.96	3116.72	ITGA5
ENSG00000172301	-0.776248	0.00197385	0.408436	147.543	108.356	225.639	213.613	COPRS
ENSG00000189001	-0.894035	0.00196163	0.408436	165.207	87.3842	260.149	210.851	SBSN
ENSG00000170540	0.454025	0.00207504	0.423939	3815.35	3299.63	2547.51	2647.14	ARL6IP1
ENSG00000094804	-0.611858	0.00239408	0.483005	311.711	252.832	454.818	408.811	CDC6
ENSG00000166897	-0.648615	0.00243528	0.485253	218.198	226.034	308.816	387.634	ELFN2
ENSG00000113583	0.496688	0.00272838	0.524238	1361.14	1604.37	969.807	1131.6	C5orf15
ENSG00000114023	0.651376	0.00270735	0.524238	618.227	434.591	298.198	372.902	FAM162A
ENSG00000185479	-0.821987	0.00269256	0.524238	116.372	81.5586	179.627	171.259	KRT6B
ENSG00000136156	0.421379	0.00279403	0.530538	7408.34	7649.03	5281.73	5961.83	ITM2B
ENSG00000092295	0.559292	0.00294831	0.549468	1111.77	810.925	683.997	621.503	TGM1
ENSG00000170477	-0.753458	0.00299586	0.549468	200.534	168.943	240.682	383.03	KRT4
ENSG00000187193	0.648374	0.00297281	0.549468	1298.8	768.981	663.645	656.492	MT1X
ENSG00000105357	-0.399065	0.00314743	0.570781	5731.33	5791.82	7424.87	7770.17	MYH14
ENSG00000113083	0.71242	0.00319837	0.573575	280.54	227.199	135.384	174.942	LOX
ENSG00000230937	0.457721	0.00341946	0.606485	2895.8	3595.57	2372.31	2353.43	MIR205HG
ENSG00000019582	0.786766	0.00350377	0.614683	306.516	184.089	150.426	134.429	CD74
ENSG00000171793	-0.527631	0.00362861	0.62974	408.342	360.023	550.383	557.972	CTPS1
ENSG00000052749	-0.475363	0.00374827	0.643585	579.783	588.387	799.029	824.988	RRP12
ENSG00000168924	-0.441738	0.0039001	0.662607	901.884	936.759	1249.42	1247.61	LETM1
ENSG00000077782	-0.439692	0.00397042	0.66328	1125.28	1230.37	1653.8	1540.41	FGFR1
ENSG00000131171	0.709095	0.00401022	0.66328	190.144	193.41	118.571	116.014	SH3BGRL
ENSG00000204644	0.564063	0.00402735	0.66328	412.498	460.223	272.537	317.657	ZFP57
ENSG00000140519	1.64206	0.00411766	0.671303	38.4444	34.9537	8.84861	14.7319	RHCG
ENSG00000144746	0.436712	0.00419934	0.677773	1338.28	1344.55	957.419	1024.79	ARL6IP5
ENSG00000100290	0.462475	0.00430348	0.686638	954.875	883.163	655.682	678.59	BIK
ENSG00000134333	0.447644	0.00433935	0.686638	23449	18545.3	14542.7	16250.2	LDHA
ENSG00000102271	1.36435	0.00442125	0.692805	74.8107	38.449	24.7761	19.3357	KLHL4
ENSG00000100228	-0.934405	0.00448268	0.695677	46.7567	74.5679	119.456	111.41	RAB36
ENSG00000124225	-0.436644	0.00475214	0.730471	1528.42	1637	2311.26	1972.24	PMEPA1
ENSG00000147454	0.493577	0.00488779	0.73728	1072.29	1410.96	893.709	869.184	SLC25A37
ENSG00000196776	0.388025	0.00485296	0.73728	4160.31	4073.27	3189.04	3102.91	CD47
ENSG00000101670	-0.528156	0.00497029	0.742782	710.702	950.74	1072.45	1322.19	LIPG
ENSG00000100234	0.371448	0.00509316	0.747306	17825.7	17888.1	14071.1	13535.9	TIMP3
ENSG00000185070	-0.542985	0.00509284	0.747306	390.678	535.956	691.076	657.413	FLRT2
ENSG00000256812	0.65079	0.0051703	0.751789	257.681	240.015	176.087	140.874	CAPNS2
ENSG00000122641	-0.414887	0.00522344	0.752734	1629.21	1549.61	2224.54	2013.67	INHBA
ENSG00000111700	0.902385	0.00536521	0.760496	114.294	121.173	76.9829	48.7995	SLCO1B3
ENSG00000170558	-0.76211	0.00537153	0.760496	90.3962	87.3842	145.117	156.527	CDH2
ENSG00000188215	0.449866	0.00560156	0.786166	832.269	858.695	627.366	610.455	DCUN1D3
ENSG00000059804	0.542127	0.00566761	0.78858	373.014	418.279	275.192	267.937	SLC2A3
ENSG00000049249	0.598607	0.00577794	0.797059	278.462	269.143	186.706	174.942	TNFRSF9
ENSG00000074047	-0.663766	0.00629394	0.810699	134.036	192.245	245.991	269.779	GLI2
ENSG00000084774	-0.457079	0.00636799	0.810699	723.17	619.845	946.801	897.727	CAD
ENSG00000100994	-0.378495	0.00630126	0.810699	2820.99	2868.53	3752.69	3643.39	PYGB
ENSG00000105726	-0.391447	0.00640065	0.810699	1961.7	1944.59	2470.53	2653.59	ATP13A1
ENSG00000124143	0.718752	0.00606065	0.810699	155.856	187.585	104.414	104.044	ARHGAP40
ENSG00000131467	-0.410476	0.00620186	0.810699	1171	1104.54	1514.88	1510.02	PSME3
ENSG00000164199	0.603105	0.00611285	0.810699	300.282	257.492	177.857	189.674	ADGRV1
ENSG00000165891	-0.581305	0.00647956	0.810699	225.471	209.722	355.714	295.559	E2F7
ENSG00000172534	-0.402814	0.00637897	0.810699	1275.94	1230.37	1655.57	1658.26	HCFC1
ENSG00000172594	0.417328	0.00644325	0.810699	1471.28	1657.97	1172.44	1170.27	SMPDL3A
ENSG00000173391	0.450877	0.00607132	0.810699	3830.93	4827.1	2911.19	3422.41	OLR1
ENSG00000184292	0.368277	0.00628091	0.810699	26758.3	25536	19538.6	20974.6	TACSTD2
ENSG00000114554	-0.384066	0.00669355	0.812285	2445.89	2625.02	3371.32	3245.63	PLXNA1
ENSG00000138131	0.55585	0.00668809	0.812285	337.687	335.555	215.021	243.077	LOXL4
ENSG00000165091	1.23395	0.00663636	0.812285	42.6005	102.531	27.4307	34.0676	TMC1
ENSG00000245648	0.700463	0.00655384	0.812285	169.363	173.603	110.608	100.361	AC022075.1
ENSG00000066735	-0.664165	0.00681923	0.821361	131.958	118.843	205.288	192.436	KIF26A
ENSG00000119943	0.647876	0.0069802	0.823496	199.495	249.336	141.578	144.557	PYROXD2
ENSG00000149043	0.584734	0.00699002	0.823496	374.053	333.225	268.113	203.485	SYT8
ENSG00000253552	0.653046	0.00690288	0.823496	233.783	194.575	131.844	140.874	HOXA-AS2
ENSG00000158769	0.404176	0.00711122	0.82572	3532.73	4013.85	2674.93	3027.41	F11R
ENSG00000196968	0.552467	0.00709642	0.82572	389.639	333.225	259.264	233.869	FUT11
ENSG00000102081	0.432325	0.00730482	0.842142	1076.44	1242.02	876.897	840.641	FMR1
ENSG00000057704	0.418893	0.0078321	0.850749	1143.98	1153.47	903.443	814.86	TMCC3
ENSG00000095203	-0.456428	0.00764943	0.850749	482.113	524.305	673.379	707.133	EPB41L4B
ENSG00000104765	0.468864	0.00764549	0.850749	616.149	566.25	428.273	426.305	BNIP3L
ENSG00000110455	0.789627	0.00783138	0.850749	138.192	205.062	80.5223	117.855	ACCS
ENSG00000110852	0.733157	0.00758965	0.850749	176.636	147.971	109.723	85.6294	CLEC2B
ENSG00000139211	-0.412013	0.00774297	0.850749	1634.41	1877.01	2475.84	2195.06	AMIGO2
ENSG00000140876	0.942615	0.00785388	0.850749	82.0839	82.7237	42.4733	43.2751	NUDT7
ENSG00000198917	-0.451237	0.00749943	0.850749	537.182	502.168	708.773	712.657	SPOUT1
ENSG00000234857	-1.1205	0.00748986	0.850749	33.2492	25.6327	56.6311	71.8182	HNRNPUL2-BSCL2
ENSG00000090861	-0.379103	0.0080483	0.865997	3055.81	3445.27	4210.17	4243.72	AARS
ENSG00000132386	0.749953	0.00817344	0.868129	126.763	157.292	86.7163	81.9464	SERPINF1
ENSG00000204394	-0.389314	0.00822947	0.868129	1580.38	1468.05	1949.35	2044.06	VARS
ENSG00000270647	-0.47679	0.00822785	0.868129	2447.97	1764	3181.96	2681.21	TAF15
ENSG00000102038	0.610319	0.00886667	0.911516	250.408	212.052	152.196	151.002	SMARCA1
ENSG00000106333	0.663486	0.00876817	0.911516	233.783	185.255	146.887	117.855	PCOLCE
ENSG00000123064	-0.397372	0.00881963	0.911516	1119.04	1039.29	1429.93	1413.34	DDX54
ENSG00000157551	0.444644	0.00884175	0.911516	670.179	683.927	512.334	482.471	KCNJ15
ENSG00000175048	-0.486393	0.00929482	0.943512	321.063	315.748	454.818	437.354	ZDHHC14
ENSG00000232316	0.758434	0.00925429	0.943512	126.763	123.503	75.2131	72.7389	LINC02518
ENSG00000064042	0.441441	0.00938765	0.946979	919.548	812.091	676.033	599.406	LIMCH1
ENSG00000167785	0.530098	0.00949866	0.952226	321.063	361.188	229.179	243.077	ZNF558
ENSG00000169474	-0.675965	0.00967004	0.963423	215.081	236.52	257.494	464.056	SPRR1A
ENSG00000085871	0.467831	0.0100829	0.968977	513.284	490.517	352.175	373.823	MGST2
ENSG00000101665	-0.515547	0.00993611	0.968977	427.044	339.051	605.245	490.758	SMAD7
ENSG00000106397	-0.374807	0.00992191	0.968977	3973.28	3423.13	4825.14	4766.7	PLOD3
ENSG00000111799	0.401385	0.01007	0.968977	2669.29	3282.15	2295.33	2209.79	COL12A1
ENSG00000116962	-0.435664	0.0100819	0.968977	938.251	854.035	1337.02	1087.4	NID1
ENSG00000120800	-0.608744	0.010086	0.968977	140.27	188.75	253.955	246.76	UTP20
ENSG00000113369	0.413772	0.0102398	0.972182	977.734	974.043	694.616	770.664	ARRDC3
ENSG00000213853	0.37337	0.0102016	0.972182	2301.47	2165.96	1679.47	1769.67	EMP2
ENSG00000069849	0.382691	0.0104445	0.976984	5888.22	6680.81	4472.97	5167.23	ATP1B3
ENSG00000105220	0.447952	0.0105549	0.976984	6109.54	4324.94	3677.48	3973.02	GPI
ENSG00000127528	-0.516691	0.0106256	0.976984	1173.07	738.688	1344.1	1393.09	KLF2
ENSG00000130758	-0.612334	0.0105432	0.976984	179.753	138.65	261.919	225.583	MAP3K10
ENSG00000139438	-0.834411	0.0106941	0.976984	56.108	54.7608	95.5649	102.203	FAM222A
ENSG00000143847	1.15053	0.0107141	0.976984	50.9128	51.2654	23.0064	23.0186	PPFIA4
ENSG00000147003	0.66422	0.0106148	0.976984	275.345	200.401	175.202	125.221	CLTRN
ENSG00000168003	-0.392935	0.0107991	0.979201	17195	18680.4	20883.6	26222.8	SLC3A2
ENSG00000186918	0.439615	0.010985	0.990487	672.257	626.836	461.897	496.282	ZNF395
ENSG00000000003	0.334317	0.034628	0.99966	975.656	934.428	758.326	756.853	TSPAN6
ENSG00000002726	-0.321245	0.0443469	0.99966	1295.68	1514.66	1643.19	1867.27	AOC1
ENSG00000004399	-0.348001	0.0467421	0.99966	464.45	440.416	562.771	589.277	PLXND1
ENSG00000004478	-0.375398	0.0307238	0.99966	1171	885.493	1316.67	1352.58	FKBP4
ENSG00000005007	-0.318761	0.0235889	0.99966	3249.07	3022.33	3811.98	4010.77	UPF1
ENSG00000005156	-0.479958	0.0321135	0.99966	166.246	194.575	250.416	252.284	LIG3
ENSG00000005187	1.24583	0.0274962	0.99966	28.054	40.7793	11.5032	17.4942	ACSM3
ENSG00000005469	0.365981	0.0231559	0.99966	1257.24	1362.03	1095.46	936.399	CROT
ENSG00000005893	0.320988	0.030673	0.99966	3101.53	3462.74	2479.38	2775.13	LAMP2
ENSG00000006118	-0.313386	0.0225214	0.99966	4295.38	4144.34	5373.76	5113.82	TMEM132A
ENSG00000006756	0.366181	0.0474823	0.99966	491.465	455.563	383.145	351.725	ARSD
ENSG00000008952	0.356177	0.0182692	0.99966	1392.31	1447.08	1137.93	1080.03	SEC62
ENSG00000010278	0.292896	0.0315388	0.99966	7654.59	8165.18	6351.53	6561.24	CD9
ENSG00000011422	0.359038	0.0127707	0.99966	5020.63	4667.48	3553.6	4000.64	PLAUR
ENSG00000011638	0.321245	0.0342673	0.99966	1311.27	1254.84	1024.67	1029.39	TMEM159
ENSG00000014123	0.34139	0.047896	0.99966	690.96	803.935	568.08	611.375	UFL1
ENSG00000015133	-0.477861	0.0327101	0.99966	171.441	213.217	273.422	261.492	CCDC88C
ENSG00000023318	0.340207	0.0358912	0.99966	2114.44	2565.6	1713.97	1982.37	ERP44
ENSG00000023445	0.322871	0.0430607	0.99966	5409.23	4901.67	4610.12	3633.26	BIRC3
ENSG00000034677	0.437647	0.0137235	0.99966	607.837	610.524	481.364	418.019	RNF19A
ENSG00000040608	-0.658551	0.0204073	0.99966	77.9278	96.7052	140.693	134.429	RTN4R
ENSG00000043093	0.373822	0.0421219	0.99966	470.684	533.626	376.066	398.683	DCUN1D1
ENSG00000049089	0.595137	0.0173423	0.99966	191.183	171.273	118.571	121.538	COL9A2
ENSG00000055483	-0.362772	0.040075	0.99966	523.675	542.947	745.053	626.107	USP36
ENSG00000057149	-0.817128	0.0196766	0.99966	55.069	67.5771	79.6375	136.27	SERPINB3
ENSG00000063244	-0.291534	0.0421839	0.99966	2522.78	2514.33	2928	3237.34	U2AF2
ENSG00000068654	-0.422271	0.0174222	0.99966	461.333	415.949	606.129	569.942	POLR1A
ENSG00000070413	-0.284107	0.0418631	0.99966	2839.69	2860.38	3565.1	3375.45	DGCR2
ENSG00000072571	0.47231	0.0193994	0.99966	862.401	737.523	470.746	683.193	HMMR
ENSG00000073111	-0.392962	0.0281943	0.99966	937.212	701.404	1102.54	1050.57	MCM2
ENSG00000074370	-0.380272	0.0454264	0.99966	323.141	328.565	401.727	446.562	ATP2A3
ENSG00000076003	-0.439241	0.019966	0.99966	357.429	314.583	446.855	464.977	MCM6
ENSG00000076356	-0.31428	0.0383195	0.99966	1711.29	2006.34	2336.03	2285.29	PLXNA2
ENSG00000078747	0.309944	0.039852	0.99966	1401.66	1511.16	1167.13	1182.24	ITCH
ENSG00000079215	0.299205	0.0409803	0.99966	4629.95	5409.66	4164.15	3994.2	SLC1A3
ENSG00000080031	0.423904	0.0148508	0.99966	579.783	581.396	430.042	435.513	PTPRH
ENSG00000080573	-0.494105	0.0459725	0.99966	123.645	133.989	185.821	176.783	COL5A3
ENSG00000082153	0.316045	0.0227125	0.99966	4625.79	4414.65	3533.25	3729.02	BZW1
ENSG00000083812	-0.532556	0.028107	0.99966	171.441	161.952	278.731	203.485	ZNF324
ENSG00000084731	-0.443456	0.0248433	0.99966	301.321	260.987	382.26	383.03	KIF3C
ENSG00000085999	-0.508997	0.0401532	0.99966	240.018	175.934	349.52	243.077	RAD54L
ENSG00000086548	-0.346873	0.0478498	0.99966	1327.89	1635.83	1661.77	2106.67	CEACAM6
ENSG00000087303	-0.444038	0.0322108	0.99966	793.825	1138.32	1101.65	1525.68	NID2
ENSG00000087884	0.593905	0.0353505	0.99966	225.471	140.98	132.729	110.49	AAMDC
ENSG00000088340	0.358622	0.0456233	0.99966	809.41	1050.94	753.901	696.084	FER1L4
ENSG00000088756	1.44898	0.0473394	0.99966	17.6636	24.4676	5.30916	10.1282	ARHGAP28
ENSG00000089154	-0.331708	0.0177815	0.99966	3019.44	3156.32	3770.39	4001.56	GCN1
ENSG00000089280	-0.342199	0.0173798	0.99966	5277.27	4792.15	6737.33	6028.12	FUS
ENSG00000089775	0.463095	0.0431039	0.99966	290.93	429.93	243.337	278.986	ZBTB25
ENSG00000090447	-0.478028	0.0405131	0.99966	168.324	149.136	210.597	232.028	TFAP4
ENSG00000095585	0.443656	0.0253011	0.99966	401.068	467.214	292.004	346.2	BLNK
ENSG00000097007	-0.309734	0.0376323	0.99966	1251	1195.42	1529.92	1502.66	ABL1
ENSG00000099814	-0.307432	0.0303689	0.99966	2150.81	2192.76	2615.65	2759.48	CEP170B
ENSG00000099821	-0.35997	0.04056	0.99966	465.489	436.921	561.002	597.564	POLRMT
ENSG00000099822	-0.925922	0.043648	0.99966	24.9369	24.4676	46.0128	47.8788	HCN2
ENSG00000100029	-0.35006	0.0327504	0.99966	1021.37	848.209	1171.56	1212.62	PES1
ENSG00000100311	-0.34046	0.0492721	0.99966	1040.08	861.026	1313.13	1094.77	PDGFB
ENSG00000100628	0.587099	0.0458294	0.99966	140.27	111.852	76.9829	91.1538	ASB2
ENSG00000100985	-0.535605	0.0315756	0.99966	461.333	294.776	669.839	427.226	MMP9
ENSG00000101161	-0.297961	0.0391539	0.99966	2419.92	2325.58	2773.15	3061.48	PRPF6
ENSG00000101255	-0.411696	0.024066	0.99966	393.795	452.068	535.341	589.277	TRIB3
ENSG00000101412	-0.588666	0.0152301	0.99966	211.964	147.971	295.543	246.76	E2F1
ENSG00000102144	0.393755	0.0161114	0.99966	8512.83	6669.16	5321.55	6235.29	PGK1
ENSG00000102878	0.489603	0.0213294	0.99966	277.423	316.913	218.561	204.406	HSF4
ENSG00000103257	-0.380655	0.013115	0.99966	26423.8	30659	33667.2	40650	SLC7A5
ENSG00000103319	0.351689	0.0404053	0.99966	1085.79	1300.28	853.89	1015.58	EEF2K
ENSG00000103549	-0.324226	0.0348923	0.99966	1014.1	988.024	1209.6	1297.33	RNF40
ENSG00000104549	-0.447583	0.0363275	0.99966	1218.79	1674.28	1541.43	2403.15	SQLE
ENSG00000105143	0.437232	0.0362346	0.99966	2131.07	1301.44	1354.72	1181.32	SLC1A6
ENSG00000105438	0.357961	0.014603	0.99966	1954.43	2082.07	1534.35	1614.99	KDELR1
ENSG00000105447	-0.436106	0.0333233	0.99966	246.252	270.308	375.181	323.182	GRWD1
ENSG00000105854	0.427948	0.015507	0.99966	1851.56	2365.2	1392.77	1741.13	PON2
ENSG00000106123	-0.500372	0.0283434	0.99966	201.573	178.264	299.083	238.473	EPHB6
ENSG00000106733	0.370527	0.0319907	0.99966	676.413	794.614	562.771	574.545	NMRK1
ENSG00000106785	-0.406769	0.0345145	0.99966	580.822	453.233	752.131	619.662	TRIM14
ENSG00000107130	-0.410449	0.0245056	0.99966	634.852	494.012	776.023	725.548	NCS1
ENSG00000107968	0.303822	0.0471239	0.99966	1312.3	1385.33	1133.51	1051.49	MAP3K8
ENSG00000107984	-0.347479	0.0445375	0.99966	4481.37	6321.96	6706.36	7037.26	DKK1
ENSG00000108179	-0.41644	0.0217706	0.99966	1720.65	1228.04	2090.93	1846.1	PPIF
ENSG00000108262	-0.399972	0.0151859	0.99966	820.839	781.797	1140.59	974.149	GIT1
ENSG00000108344	-0.329048	0.0349206	0.99966	2121.71	2035.47	2353.73	2869.04	PSMD3
ENSG00000108424	-0.289923	0.0397949	0.99966	5719.9	5089.26	6732.9	6482.97	KPNB1
ENSG00000108883	-0.352399	0.0311151	0.99966	926.821	1048.61	1169.79	1351.66	EFTUD2
ENSG00000109111	-0.353299	0.0155396	0.99966	1396.47	1447.08	1817.5	1814.79	SUPT6H
ENSG00000109534	-0.391191	0.0493584	0.99966	368.858	291.281	447.739	418.939	GAR1
ENSG00000109971	-0.330689	0.0194804	0.99966	6537.62	5786	7546.98	7952.48	HSPA8
ENSG00000110013	0.465923	0.0135854	0.99966	747.068	601.203	530.916	445.641	SIAE
ENSG00000110092	-0.31421	0.0230125	0.99966	3783.13	4017.34	4932.21	4765.78	CCND1
ENSG00000110107	-0.368135	0.0239842	0.99966	843.698	729.367	1020.24	1010.98	PRPF19
ENSG00000111186	-0.468229	0.0150346	0.99966	344.96	301.767	470.746	424.464	WNT5B
ENSG00000111669	0.351383	0.0282902	0.99966	5978.62	4650	4010.19	4321.98	TPI1
ENSG00000111671	-0.507539	0.036452	0.99966	156.895	130.494	195.554	213.613	SPSB2
ENSG00000111885	0.357411	0.0181929	0.99966	1281.13	1314.26	1019.36	1006.38	MAN1A1
ENSG00000111897	0.371559	0.0154596	0.99966	3472.46	4213.08	3068.7	2870.89	SERINC1
ENSG00000112159	-0.36264	0.0466719	0.99966	436.396	535.956	643.294	605.851	MDN1
ENSG00000112238	-1.42562	0.0218555	0.99966	8.3123	13.9815	31.855	27.6224	PRDM13
ENSG00000112343	0.340196	0.0238913	0.99966	1546.09	1673.12	1236.15	1306.54	TRIM38
ENSG00000112559	-0.358788	0.0222761	0.99966	1100.34	1015.99	1433.47	1280.76	MDFI
ENSG00000112578	-0.385683	0.0449088	0.99966	418.732	333.225	498.177	485.233	BYSL
ENSG00000112773	0.307104	0.0372351	0.99966	2775.27	2551.62	2261.7	2044.06	FAM46A
ENSG00000113645	-0.411387	0.015893	0.99966	889.416	1097.55	1228.19	1413.34	WWC1
ENSG00000114107	0.439696	0.043326	0.99966	275.345	248.171	194.669	191.515	CEP70
ENSG00000114767	-0.634415	0.0135051	0.99966	122.606	104.861	183.166	170.338	RRP9
ENSG00000115457	0.463896	0.0471522	0.99966	1142.94	624.506	662.761	619.662	IGFBP2
ENSG00000115596	0.71181	0.0292459	0.99966	206.768	101.366	92.9104	95.7576	WNT6
ENSG00000115687	-0.591936	0.03369	0.99966	99.7476	94.3749	163.699	128.904	PASK
ENSG00000116005	0.362692	0.0316599	0.99966	1239.57	1475.05	965.383	1145.41	PCYOX1
ENSG00000116062	-0.339932	0.0449282	0.99966	744.99	648.973	933.528	831.434	MSH6
ENSG00000116649	-0.402436	0.0449023	0.99966	469.645	353.032	588.432	499.965	SRM
ENSG00000116852	-0.777582	0.0252578	0.99966	46.7567	51.2654	83.1769	84.7086	KIF21B
ENSG00000117151	0.515207	0.0249865	0.99966	297.165	334.39	182.281	259.65	CTBS
ENSG00000117335	0.362119	0.0434329	0.99966	2717.08	3914.81	2527.16	2631.49	CD46
ENSG00000117360	-0.332819	0.0392265	0.99966	738.756	820.246	955.649	1007.3	PRPF3
ENSG00000119333	-0.366215	0.0267618	0.99966	1771.56	1371.35	2008.63	2044.06	WDR34
ENSG00000119655	0.330614	0.0327747	0.99966	2291.08	1992.36	1606.91	1800.06	NPC2
ENSG00000120694	-0.334925	0.0345007	0.99966	846.815	779.467	1036.17	1015.58	HSPH1
ENSG00000120889	0.34111	0.0367128	0.99966	854.089	947.245	728.24	693.322	TNFRSF10B
ENSG00000122547	-0.721677	0.0269046	0.99966	66.4984	69.9074	135.384	89.3124	EEPD1
ENSG00000124102	-0.603499	0.0324023	0.99966	221.315	125.833	215.906	313.054	PI3
ENSG00000124116	0.775649	0.0190548	0.99966	127.802	85.054	59.2857	65.373	WFDC3
ENSG00000124608	-0.42	0.0188606	0.99966	387.561	393.811	514.104	531.27	AARS2
ENSG00000125629	0.393655	0.0478569	0.99966	401.068	353.032	302.622	271.62	INSIG2
ENSG00000125848	0.382318	0.0187628	0.99966	885.26	993.85	720.277	720.944	FLRT3
ENSG00000126254	-0.342761	0.0474581	0.99966	1701.94	1265.32	1821.04	1943.69	RBM42
ENSG00000126461	-0.399004	0.0223141	0.99966	1378.8	1020.65	1564.43	1601.18	SCAF1
ENSG00000126787	0.381242	0.0314578	0.99966	1095.15	895.979	698.155	831.434	DLGAP5
ENSG00000126882	-0.556215	0.0488856	0.99966	90.3962	97.8703	122.996	153.765	FAM78A
ENSG00000126947	0.836623	0.0305452	0.99966	94.5524	59.4213	49.5522	36.8298	ARMCX1
ENSG00000127324	1.57806	0.0418395	0.99966	14.5465	23.3025	6.19402	6.44522	TSPAN8
ENSG00000127990	0.451339	0.0124071	0.99966	575.627	607.029	399.072	465.897	SGCE
ENSG00000128191	-0.445611	0.0189644	0.99966	426.005	374.004	595.511	494.441	DGCR8
ENSG00000128422	-0.419503	0.0141981	0.99966	7540.29	5428.31	9034.43	8312.49	KRT17
ENSG00000128849	-0.753064	0.0464406	0.99966	50.9128	34.9537	74.3283	70.8974	CGNL1
ENSG00000129226	0.928894	0.0244121	0.99966	58.1861	60.5864	27.4307	34.9883	CD68
ENSG00000129675	1.02369	0.0346239	0.99966	48.8348	37.2839	20.3518	22.0979	ARHGEF6
ENSG00000129932	-0.510933	0.0338293	0.99966	154.817	132.824	213.251	197.04	DOHH
ENSG00000130066	0.319443	0.0247216	0.99966	8866.11	9526.04	6910.76	7828.18	SAT1
ENSG00000130204	-0.446325	0.0211213	0.99966	894.611	608.194	1024.67	1024.79	TOMM40
ENSG00000130402	-0.293848	0.030313	0.99966	7440.55	7189.97	8697.29	9238.76	ACTN4
ENSG00000130595	0.442295	0.0133664	0.99966	818.761	667.615	525.607	569.021	TNNT3
ENSG00000130726	-0.335982	0.0326632	0.99966	4907.37	3841.41	5532.15	5512.51	TRIM28
ENSG00000130816	-0.346945	0.0306119	0.99966	2109.25	1678.94	2351.07	2468.52	DNMT1
ENSG00000130881	-0.448811	0.0448415	0.99966	248.33	199.236	338.017	273.462	LRP3
ENSG00000131462	-0.350536	0.048768	0.99966	595.368	489.352	675.149	708.974	TUBG1
ENSG00000131737	-0.502182	0.0252163	0.99966	171.441	168.943	233.603	248.601	KRT34
ENSG00000132182	-0.450659	0.0448851	0.99966	247.291	332.06	338.902	452.086	NUP210
ENSG00000132361	-0.356847	0.0217905	0.99966	978.773	894.814	1190.14	1209.86	CLUH
ENSG00000132541	0.569347	0.0367643	0.99966	185.988	142.145	99.1044	122.459	RIDA
ENSG00000132561	0.336947	0.0325478	0.99966	1696.75	1908.47	1323.75	1530.28	MATN2
ENSG00000132669	0.341592	0.025165	0.99966	1244.77	1216.39	987.504	954.814	RIN2
ENSG00000133422	-0.332108	0.0421273	0.99966	708.623	697.908	931.758	838.8	MORC2
ENSG00000133424	-0.53452	0.0176094	0.99966	230.666	180.594	322.974	273.462	LARGE1
ENSG00000133687	0.975588	0.0307274	0.99966	57.1471	47.77	20.3518	33.1469	TMTC1
ENSG00000133794	0.453006	0.038918	0.99966	271.189	244.676	193.784	183.228	ARNTL
ENSG00000133816	-0.4035	0.0380718	0.99966	308.594	384.49	463.667	452.086	MICAL2
ENSG00000133985	-0.296054	0.0479077	0.99966	1284.25	1198.91	1527.27	1521.99	TTC9
ENSG00000134339	0.455932	0.0130346	0.99966	1641.68	2168.29	1222.88	1554.22	SAA2
ENSG00000134363	-0.455487	0.0342748	0.99966	416.654	483.526	491.098	743.042	FST
ENSG00000134574	0.346496	0.0317861	0.99966	1114.89	1007.83	874.242	795.524	DDB2
ENSG00000134871	-0.303797	0.0272657	0.99966	11518.8	11847	15176.2	13665.7	COL4A2
ENSG00000135069	-0.311945	0.0403278	0.99966	1006.83	1050.94	1294.55	1259.58	PSAT1
ENSG00000135218	0.494713	0.027399	0.99966	299.243	357.693	199.094	267.016	CD36
ENSG00000135372	-0.347133	0.0402818	0.99966	540.299	545.277	662.761	718.182	NAT10
ENSG00000135549	0.926352	0.0367922	0.99966	57.1471	45.4398	30.0853	23.9394	PKIB
ENSG00000136147	0.625878	0.0379486	0.99966	104.943	130.494	81.4072	70.8974	PHF11
ENSG00000136378	-0.397566	0.0345233	0.99966	891.494	759.66	1254.73	920.746	ADAMTS7
ENSG00000136875	-0.301076	0.0482214	0.99966	1044.23	999.675	1240.57	1278	PRPF4
ENSG00000136937	-0.343638	0.0438199	0.99966	623.422	745.679	843.272	893.124	NCBP1
ENSG00000136944	-0.539834	0.0389558	0.99966	123.645	111.852	153.081	189.674	LMX1B
ENSG00000137166	-0.386074	0.0231929	0.99966	643.164	554.598	772.483	793.683	FOXP4
ENSG00000137393	0.301913	0.0416024	0.99966	2213.15	2247.52	1917.49	1700.62	RNF144B
ENSG00000137404	0.442278	0.0310001	0.99966	412.498	340.216	294.659	259.65	NRM
ENSG00000137727	1.22156	0.0191984	0.99966	31.1711	51.2654	15.9275	19.3357	ARHGAP20
ENSG00000137968	0.449623	0.0463466	0.99966	226.51	231.859	171.663	163.893	SLC44A5
ENSG00000138162	-0.304387	0.0474484	0.99966	1482.71	1685.93	1862.63	2049.58	TACC2
ENSG00000138604	0.374987	0.0302319	0.99966	683.687	803.935	560.117	586.515	GLCE
ENSG00000139291	0.296935	0.0421721	0.99966	1693.63	1705.74	1381.27	1385.72	TMEM19
ENSG00000139641	-0.315546	0.0341014	0.99966	1461.93	1553.11	1798.04	1953.82	ESYT1
ENSG00000139718	-0.366845	0.0433411	0.99966	422.888	510.324	614.978	587.436	SETD1B
ENSG00000140279	0.392077	0.0226158	0.99966	646.281	731.697	522.068	527.587	DUOX2
ENSG00000140297	0.379741	0.0235031	0.99966	679.53	700.239	530.916	529.429	GCNT3
ENSG00000140323	-0.357734	0.0316309	0.99966	782.395	904.135	1012.28	1148.17	DISP2
ENSG00000140398	0.597145	0.0300417	0.99966	184.949	145.64	124.765	93.9161	NEIL1
ENSG00000140612	0.322668	0.0442672	0.99966	1529.46	1278.14	1137.05	1108.58	SEC11A
ENSG00000140937	1.00889	0.0226155	0.99966	42.6005	72.2376	27.4307	29.4639	CDH11
ENSG00000141497	0.480421	0.0443845	0.99966	192.222	214.383	153.081	138.112	ZMYND15
ENSG00000142192	-0.265308	0.0488912	0.99966	22523.2	24332.4	28673.9	27640.8	APP
ENSG00000142867	0.368434	0.0201447	0.99966	1149.18	1045.12	827.345	872.867	BCL10
ENSG00000143164	0.328661	0.0487327	0.99966	711.741	741.018	561.002	595.723	DCAF6
ENSG00000143320	0.441487	0.0316559	0.99966	1961.7	1216.39	1113.15	1228.28	CRABP2
ENSG00000143333	0.69268	0.0416542	0.99966	100.787	76.8981	53.9765	56.1655	RGS16
ENSG00000143412	-0.577271	0.0255858	0.99966	162.09	203.896	212.367	333.31	ANXA9
ENSG00000143878	-0.334708	0.0244823	0.99966	6608.28	5460.93	7710.68	7511.45	RHOB
ENSG00000145425	0.349882	0.0189435	0.99966	6685.17	6443.13	4670.29	5631.28	RPS3A
ENSG00000145990	-0.463365	0.0139394	0.99966	309.633	307.592	424.733	426.305	GFOD1
ENSG00000146411	0.539484	0.0207638	0.99966	410.42	636.157	307.047	412.494	SLC2A12
ENSG00000146576	-0.408878	0.0304075	0.99966	337.687	316.913	451.279	418.019	C7orf26
ENSG00000146904	-0.34682	0.040523	0.99966	1134.63	1245.52	1333.48	1693.25	EPHA1
ENSG00000147642	-0.465406	0.0181624	0.99966	293.009	368.179	469.861	441.958	SYBU
ENSG00000147676	0.277565	0.0477778	0.99966	3798.72	3747.03	2992.6	3232.74	MAL2
ENSG00000148677	-1.07219	0.0344747	0.99966	17.6636	20.9722	45.1279	35.9091	ANKRD1
ENSG00000148700	0.314102	0.0405543	0.99966	1306.07	1231.53	994.583	1046.89	ADD3
ENSG00000148843	-0.383366	0.0122594	0.99966	933.056	976.373	1257.39	1232.88	PDCD11
ENSG00000152256	0.554485	0.0141205	0.99966	228.588	252.832	162.814	164.814	PDK1
ENSG00000152558	0.297974	0.0362261	0.99966	2639.15	2597.06	2067.92	2191.38	TMEM123
ENSG00000153048	0.317759	0.0415336	0.99966	1663.5	1430.77	1225.53	1257.74	CARHSP1
ENSG00000153162	-0.77656	0.0115964	0.99966	63.3813	69.9074	120.341	107.727	BMP6
ENSG00000153233	0.559628	0.0116034	0.99966	278.462	304.097	175.202	220.058	PTPRR
ENSG00000153404	0.909613	0.0390562	0.99966	56.108	45.4398	27.4307	26.7016	PLEKHG4B
ENSG00000153976	-0.62043	0.0301883	0.99966	80.0059	86.2191	128.305	127.063	HS3ST3A1
ENSG00000154079	0.570155	0.0469785	0.99966	148.582	116.512	84.9466	93.9161	SDHAF4
ENSG00000154153	0.420472	0.0116412	0.99966	1233.34	1420.28	1075.99	906.014	RETREG1
ENSG00000154639	0.380746	0.0366676	0.99966	627.579	795.779	531.801	560.734	CXADR
ENSG00000155506	-0.304774	0.0313942	0.99966	2529.02	2404.81	3126.21	2968.48	LARP1
ENSG00000156171	0.358011	0.0435863	0.99966	578.744	636.157	446.855	500.886	DRAM2
ENSG00000158019	0.419952	0.0409606	0.99966	334.57	302.932	230.949	245.839	BABAM2
ENSG00000158669	-0.336271	0.0161491	0.99966	3188.81	3338.08	4249.1	3990.51	GPAT4
ENSG00000159200	0.362856	0.0227743	0.99966	912.275	964.722	726.471	732.914	RCAN1
ENSG00000159363	-0.30972	0.0419807	0.99966	1145.02	1117.35	1343.22	1461.22	ATP13A2
ENSG00000159450	-0.42274	0.0392322	0.99966	227.549	248.171	312.356	325.023	TCHH
ENSG00000159713	-0.593663	0.0305442	0.99966	203.651	128.163	298.198	203.485	TPPP3
ENSG00000160072	-0.36426	0.041982	0.99966	461.333	406.628	565.426	552.448	ATAD3B
ENSG00000160113	-0.387146	0.0269631	0.99966	1568.95	1151.14	1737.87	1821.24	NR2F6
ENSG00000160183	0.576136	0.0458658	0.99966	122.606	136.319	76.9829	96.6783	TMPRSS3
ENSG00000160293	-0.353085	0.0255967	0.99966	1214.63	1109.2	1586.56	1382.04	VAV2
ENSG00000160633	-0.309197	0.040517	0.99966	1279.05	1170.95	1507.8	1528.44	SAFB
ENSG00000160818	-0.473184	0.0238862	0.99966	274.306	220.208	353.059	334.231	GPATCH4
ENSG00000161904	-0.322615	0.0325003	0.99966	1439.07	1510	1739.64	1948.3	LEMD2
ENSG00000162366	0.596016	0.0171771	0.99966	218.198	188.75	118.571	151.002	PDZK1IP1
ENSG00000162757	0.443244	0.0174583	0.99966	484.191	447.407	356.599	328.706	C1orf74
ENSG00000162814	0.758176	0.0388898	0.99966	91.4353	65.2469	50.4371	42.3543	SPATA17
ENSG00000163064	-0.789527	0.0492802	0.99966	45.7176	29.1281	65.4797	64.4522	EN1
ENSG00000163083	-0.386272	0.0169279	0.99966	1719.61	2122.85	2358.15	2662.8	INHBB
ENSG00000163395	-1.06977	0.0192544	0.99966	27.015	20.9722	52.2068	48.7995	IGFN1
ENSG00000163660	0.381	0.0165194	0.99966	2562.27	3208.75	2270.55	2160.07	CCNL1
ENSG00000163734	0.531041	0.0201775	0.99966	245.213	255.162	154.851	191.515	CXCL3
ENSG00000163785	0.332758	0.0480827	0.99966	706.545	711.89	537.995	588.357	RYK
ENSG00000164237	0.404352	0.0494859	0.99966	329.375	307.592	227.409	254.126	CMBL
ENSG00000164241	1.28643	0.0300364	0.99966	29.093	30.2932	13.2729	11.049	C5orf63
ENSG00000164342	0.393214	0.0477868	0.99966	474.84	646.643	442.43	410.653	TLR3
ENSG00000164366	0.389454	0.0213929	0.99966	1066.05	983.364	856.545	708.054	CCDC127
ENSG00000164400	-0.813351	0.027193	0.99966	40.5225	45.4398	69.904	81.0256	CSF2
ENSG00000164604	1.14805	0.015473	0.99966	59.2251	38.449	23.0064	21.1772	GPR85
ENSG00000164611	0.424285	0.0254082	0.99966	863.44	667.615	519.413	622.424	PTTG1
ENSG00000164904	0.426732	0.0198823	0.99966	947.602	991.519	613.208	829.592	ALDH7A1
ENSG00000164919	0.442246	0.0133241	0.99966	815.644	845.879	537.995	685.035	COX6C
ENSG00000165071	1.36016	0.0175683	0.99966	34.2882	34.9537	17.6972	9.20746	TMEM71
ENSG00000165272	0.349415	0.0342504	0.99966	10873.5	11433.3	7446.1	10062.8	AQP3
ENSG00000165434	0.457851	0.0161956	0.99966	442.63	425.27	334.477	297.401	PGM2L1
ENSG00000165661	-0.30902	0.047864	0.99966	888.377	965.887	1126.43	1170.27	QSOX2
ENSG00000166106	-0.652373	0.0409116	0.99966	98.7085	60.5864	140.693	110.49	ADAMTS15
ENSG00000166130	0.486832	0.0126136	0.99966	383.405	378.665	282.271	261.492	IKBIP
ENSG00000166394	0.830111	0.0139272	0.99966	104.943	83.8888	57.5159	48.7995	CYB5R2
ENSG00000166473	0.61315	0.025704	0.99966	174.558	217.878	155.735	100.361	PKD1L2
ENSG00000166508	-0.354641	0.0371834	0.99966	3182.57	2336.07	3638.55	3419.65	MCM7
ENSG00000166535	-0.321912	0.0316619	0.99966	1372.57	1496.02	1849.36	1735.61	A2ML1
ENSG00000166710	0.313033	0.039922	0.99966	25321.3	21484.9	20362.4	17314.6	B2M
ENSG00000166828	0.685649	0.0222487	0.99966	118.45	110.687	73.4434	69.0559	SCNN1G
ENSG00000166986	-0.31811	0.0261742	0.99966	2343.03	2323.25	2782.89	3034.78	MARS
ENSG00000167114	-0.392884	0.0151321	0.99966	1020.33	1029.97	1225.53	1466.75	SLC27A4
ENSG00000167543	-0.323935	0.0393165	0.99966	786.551	820.246	995.468	1015.58	TP53I13
ENSG00000167548	-0.393227	0.0193841	0.99966	1345.55	1765.16	1990.05	2093.78	KMT2D
ENSG00000167601	-0.384817	0.023632	0.99966	1021.37	1021.81	1497.18	1170.27	AXL
ENSG00000167634	0.729735	0.0413385	0.99966	78.9668	76.8981	41.5884	52.4825	NLRP7
ENSG00000167747	-0.438511	0.0233978	0.99966	513.284	417.114	699.04	562.576	C19orf48
ENSG00000167768	-0.575365	0.0119888	0.99966	167.285	181.759	233.603	286.352	KRT1
ENSG00000167994	-0.839262	0.0222095	0.99966	37.4053	50.1003	78.7526	77.3427	RAB3IL1
ENSG00000168679	0.667956	0.0125536	0.99966	158.973	187.585	94.6801	123.38	SLC16A4
ENSG00000169047	-0.388447	0.0413007	0.99966	308.594	315.748	422.078	395	IRS1
ENSG00000169752	0.675006	0.0320412	0.99966	151.699	95.5401	76.9829	78.2634	NRG4
ENSG00000170091	-2.01223	0.022625	0.99966	2.07807	6.99074	21.2367	14.7319	NSG2
ENSG00000170348	0.384843	0.0162178	0.99966	4408.64	5089.26	3248.32	4025.5	TMED10
ENSG00000170465	-1.11903	0.0371902	0.99966	28.054	11.6512	33.6247	53.4033	KRT6C
ENSG00000170604	-0.445213	0.0221319	0.99966	454.059	371.674	617.633	507.331	IRF2BP1
ENSG00000170962	0.60444	0.0243308	0.99966	166.246	167.778	126.535	92.9953	PDGFD
ENSG00000171236	0.488169	0.026899	0.99966	407.303	470.71	253.07	372.902	LRG1
ENSG00000171314	0.331318	0.0439816	0.99966	5537.03	4277.17	3652.7	4148.88	PGAM1
ENSG00000172009	-0.379891	0.0469152	0.99966	422.888	339.051	502.601	489.837	THOP1
ENSG00000172243	0.607721	0.0186944	0.99966	339.765	572.075	240.682	357.249	CLEC7A
ENSG00000172403	0.644387	0.047732	0.99966	112.216	85.054	60.1705	66.2937	SYNPO2
ENSG00000172465	0.589931	0.0245521	0.99966	221.315	161.952	138.923	116.014	TCEAL1
ENSG00000172818	0.318571	0.0373608	0.99966	1990.8	1952.75	1459.14	1703.38	OVOL1
ENSG00000172927	-0.379063	0.0235484	0.99966	712.78	753.834	876.897	1030.31	MYEOV
ENSG00000172986	1.21654	0.0257781	0.99966	37.4053	38.449	10.6183	22.0979	GXYLT2
ENSG00000173432	0.389358	0.0394638	0.99966	3574.29	3581.59	2156.41	3307.32	SAA1
ENSG00000173638	-0.501184	0.0156341	0.99966	229.627	226.034	303.507	341.597	SLC19A1
ENSG00000173801	-0.339042	0.0137752	0.99966	14682.6	14791.2	17590.1	19692	JUP
ENSG00000174243	-0.322036	0.0277956	0.99966	1956.51	1893.32	2284.71	2528.37	DDX23
ENSG00000174720	0.353554	0.0265355	0.99966	972.539	1064.92	782.217	812.098	LARP7
ENSG00000175061	0.29915	0.0320327	0.99966	4103.16	3976.56	3173.99	3392.95	LRRC75A-AS1
ENSG00000175416	-0.329487	0.0420967	0.99966	3690.66	2867.37	3933.21	4309.09	CLTB
ENSG00000175467	-0.355624	0.0223066	0.99966	1229.18	1106.87	1423.74	1566.19	SART1
ENSG00000175938	0.497603	0.0115344	0.99966	423.927	367.014	276.077	284.51	ORAI3
ENSG00000176022	-0.406014	0.0259339	0.99966	560.041	459.058	714.967	636.235	B3GALT6
ENSG00000176092	-0.311983	0.0347539	0.99966	1414.13	1534.47	1819.27	1840.57	CRYBG2
ENSG00000176244	1.26849	0.043501	0.99966	20.7807	33.7886	10.6183	11.9697	ACBD7
ENSG00000176597	0.311089	0.0414363	0.99966	1337.24	1374.84	1137.05	1048.73	B3GNT5
ENSG00000177192	-0.373272	0.0479926	0.99966	343.921	327.399	414.115	455.769	PUS1
ENSG00000177283	-0.332357	0.0445271	0.99966	1146.06	923.942	1293.67	1313.9	FZD8
ENSG00000177302	-0.407646	0.0497233	0.99966	259.759	248.171	368.102	305.688	TOP3A
ENSG00000177614	-0.75323	0.0338803	0.99966	50.9128	48.9352	96.4498	71.8182	PGBD5
ENSG00000177706	-0.376326	0.0255316	0.99966	724.209	621.01	900.788	846.165	FAM20C
ENSG00000177721	0.697178	0.0233916	0.99966	109.099	106.026	64.5948	68.1352	ANXA2R
ENSG00000177854	0.396527	0.0389118	0.99966	480.035	439.251	319.435	379.347	TMEM187
ENSG00000178209	-0.330773	0.0250676	0.99966	23988.3	29278.4	33110.6	33880.7	PLEC
ENSG00000178409	-0.976403	0.0415834	0.99966	16.6246	33.7886	45.1279	53.4033	BEND3
ENSG00000179029	0.586141	0.0135405	0.99966	330.414	230.694	192.9	181.387	TMEM107
ENSG00000179041	-0.471803	0.0186452	0.99966	304.438	252.832	379.605	394.079	RRS1
ENSG00000179387	0.382148	0.0422802	0.99966	467.567	434.591	365.447	326.865	ELMOD2
ENSG00000179431	-0.758009	0.0284527	0.99966	72.7326	46.6049	115.917	86.5501	FJX1
ENSG00000179546	-0.769757	0.047938	0.99966	39.4834	36.1188	65.4797	63.5315	HTR1D
ENSG00000179776	0.5122	0.0442379	0.99966	201.573	272.639	139.808	192.436	CDH5
ENSG00000179820	0.280925	0.0483053	0.99966	2636.04	2571.43	2201.53	2084.57	MYADM
ENSG00000179943	-0.506345	0.0323471	0.99966	170.402	142.145	233.603	210.851	FIZ1
ENSG00000180900	-0.323656	0.0218504	0.99966	2989.31	2753.18	3632.35	3555	SCRIB
ENSG00000180921	-0.301603	0.0446941	0.99966	4342.14	3608.38	5018.93	4781.43	FAM83H
ENSG00000181634	0.413505	0.0237714	0.99966	566.275	497.507	414.115	384.872	TNFSF15
ENSG00000181638	-0.410716	0.0473328	0.99966	261.837	229.529	343.326	310.291	ZFP41
ENSG00000181804	0.916591	0.0121245	0.99966	73.7717	85.054	37.1641	46.958	SLC9A9
ENSG00000182220	0.329056	0.0365792	0.99966	2088.47	2450.25	1690.08	1922.52	ATP6AP2
ENSG00000183114	-0.671274	0.0172717	0.99966	91.4353	83.8888	150.426	128.904	FAM43B
ENSG00000183495	-0.372842	0.0247232	0.99966	891.494	1102.21	1259.16	1321.27	EP400
ENSG00000183688	-0.395944	0.0228081	0.99966	445.747	440.416	579.584	586.515	RFLNB
ENSG00000183696	-0.384909	0.0132218	0.99966	1382.96	1485.53	1731.67	2013.67	UPP1
ENSG00000183876	-0.377951	0.0261975	0.99966	1362.18	1620.69	1723.71	2151.78	ARSI
ENSG00000184058	-0.61546	0.0378184	0.99966	117.411	72.2376	143.347	148.24	TBX1
ENSG00000184254	-0.28237	0.0370481	0.99966	5002.96	5139.36	6094.92	6239.9	ALDH1A3
ENSG00000184575	-0.336332	0.0278482	0.99966	1155.41	1300.28	1534.35	1565.27	XPOT
ENSG00000184992	-0.395755	0.0419747	0.99966	339.765	294.776	398.187	437.354	BRI3BP
ENSG00000185499	0.368901	0.0112581	0.99966	2088.47	2016.83	1544.97	1634.32	MUC1
ENSG00000185522	0.565607	0.0320326	0.99966	163.129	150.301	112.377	99.4406	LMNTD2
ENSG00000185561	0.33392	0.0443615	0.99966	720.053	704.899	569.85	560.734	TLCD2
ENSG00000185803	-0.370967	0.0124847	0.99966	1724.8	1790.79	2141.36	2404.99	SLC52A2
ENSG00000186174	-0.302023	0.0422127	0.99966	1807.92	2034.3	2295.33	2440.9	BCL9L
ENSG00000186185	-0.477801	0.0246981	0.99966	391.717	269.143	450.394	471.422	KIF18B
ENSG00000186832	-0.357048	0.0187081	0.99966	3729.1	3416.14	4168.58	4984	KRT16
ENSG00000187720	-0.395878	0.0373945	0.99966	307.555	334.39	408.806	435.513	THSD4
ENSG00000188158	-0.741436	0.0235215	0.99966	62.3422	58.2561	113.262	88.3916	NHS
ENSG00000188508	-1.31369	0.0448435	0.99966	14.5465	6.99074	31.855	22.0979	KRTDAP
ENSG00000188747	0.458021	0.0485388	0.99966	267.033	242.346	210.597	160.21	NOXA1
ENSG00000188807	-0.504602	0.0369524	0.99966	152.738	132.824	192.015	213.613	TMEM201
ENSG00000188976	-0.318238	0.0320176	0.99966	1399.58	1405.14	1678.58	1818.47	NOC2L
ENSG00000189057	-0.525309	0.0351154	0.99966	269.111	196.906	405.266	266.096	FAM111B
ENSG00000189159	-0.373657	0.0326358	0.99966	2604.87	1873.52	2796.16	3008.08	JPT1
ENSG00000189184	1.69561	0.0318202	0.99966	22.8588	15.1466	4.4243	7.36597	PCDH18
ENSG00000196126	0.572236	0.0190561	0.99966	241.057	199.236	163.699	132.587	HLA-DRB1
ENSG00000196305	-0.348978	0.022768	0.99966	1924.3	2308.11	2649.27	2740.14	IARS
ENSG00000196312	-0.561837	0.0158858	0.99966	151.699	166.613	253.07	216.375	MFSD14C
ENSG00000196363	-0.374242	0.0314804	0.99966	1040.08	796.944	1165.36	1217.23	WDR5
ENSG00000196365	-0.409905	0.0136833	0.99966	627.579	582.561	776.908	831.434	LONP1
ENSG00000196549	0.391903	0.0169126	0.99966	1136.71	1351.54	907.867	987.96	MME
ENSG00000196642	-0.319011	0.0233214	0.99966	2285.88	2216.06	2797.93	2818.4	RABL6
ENSG00000196821	-0.292651	0.0467733	0.99966	2750.33	2859.21	3190.81	3680.22	C6orf106
ENSG00000196924	-0.298142	0.047572	0.99966	26602.5	30353.8	31934.6	38095.9	FLNA
ENSG00000197353	-0.555179	0.04011	0.99966	178.714	189.915	194.669	347.121	LYPD2
ENSG00000197696	0.716415	0.0231764	0.99966	154.817	97.8703	82.292	71.8182	NMB
ENSG00000197785	-0.530029	0.0131051	0.99966	498.738	322.739	610.554	577.308	ATAD3A
ENSG00000197982	-0.395386	0.0399256	0.99966	490.426	371.674	570.735	564.417	C1orf122
ENSG00000198435	-0.562596	0.0198219	0.99966	234.822	158.457	265.458	316.737	NRARP
ENSG00000198513	0.673032	0.0317036	0.99966	98.7085	117.677	61.0554	74.5804	ATL1
ENSG00000198535	1.5975	0.0372235	0.99966	20.7807	17.4768	5.30916	7.36597	C2CD4A
ENSG00000198720	-0.504614	0.0124349	0.99966	416.654	351.867	619.402	471.422	ANKRD13B
ENSG00000198919	0.466406	0.0292876	0.99966	268.072	312.253	207.942	211.772	DZIP3
ENSG00000203985	0.589122	0.0399564	0.99966	123.645	123.503	80.5223	83.7879	LDLRAD1
ENSG00000204131	-1.14618	0.0470468	0.99966	13.5075	15.1466	26.5458	36.8298	NHSL2
ENSG00000204745	-1.87884	0.0191487	0.99966	5.19519	5.82561	24.7761	15.6527	AC083899.1
ENSG00000205213	0.41676	0.0193074	0.99966	531.987	586.057	425.618	411.573	LGR4
ENSG00000205221	1.21332	0.0174862	0.99966	55.069	38.449	27.4307	12.8904	VIT
ENSG00000205426	-0.308802	0.0471177	0.99966	6504.37	7081.62	7469.99	9358.46	KRT81
ENSG00000205903	-0.386035	0.0203888	0.99966	907.08	751.504	1108.73	1059.78	ZNF316
ENSG00000210049	0.542101	0.02145	0.99966	620.305	562.754	517.643	294.639	MT-TF
ENSG00000210196	0.362699	0.032184	0.99966	3919.25	5308.3	3427.95	3747.44	MT-TP
ENSG00000213809	1.20622	0.0306775	0.99966	27.015	41.9444	14.1578	15.6527	KLRK1
ENSG00000213983	0.351063	0.0366805	0.99966	1114.89	1370.18	1020.24	927.191	AP1G2
ENSG00000214357	0.466353	0.0471287	0.99966	306.516	233.025	215.906	174.942	NEURL1B
ENSG00000214706	-0.382639	0.0388031	0.99966	403.146	357.693	476.055	516.538	IFRD2
ENSG00000218336	-0.469511	0.029263	0.99966	220.276	220.208	335.362	274.382	TENM3
ENSG00000223745	0.547836	0.0297506	0.99966	225.471	349.537	218.561	174.021	CCDC18-AS1
ENSG00000223829	0.419016	0.0256028	0.99966	564.197	468.379	376.951	395.921	AC004870.2
ENSG00000224081	0.595045	0.0282813	0.99966	141.309	147.971	91.1406	100.361	SLC44A3-AS1
ENSG00000224689	1.3555	0.0446573	0.99966	21.8198	24.4676	7.96375	10.1282	ZNF812P
ENSG00000227063	0.409764	0.0187792	0.99966	627.579	669.946	461.012	515.618	RPL41P1
ENSG00000228459	1.16216	0.0390858	0.99966	35.3273	29.1281	15.9275	12.8904	LINC01546
ENSG00000230943	0.948395	0.0184316	0.99966	55.069	75.733	35.3944	32.2261	LINC02541
ENSG00000231131	-0.403674	0.0324756	0.99966	524.714	723.541	846.812	802.89	LINC01468
ENSG00000231389	0.882707	0.0132922	0.99966	77.9278	85.054	47.7825	40.5128	HLA-DPA1
ENSG00000232677	-0.382881	0.0438573	0.99966	322.102	313.418	430.042	398.683	LINC00665
ENSG00000233429	0.52907	0.0132075	0.99966	298.204	382.16	238.027	232.949	HOTAIRM1
ENSG00000235173	-0.500613	0.0289619	0.99966	209.886	165.447	284.04	247.681	HGH1
ENSG00000235655	0.452936	0.0384938	0.99966	245.213	273.804	192.015	186.911	H3F3AP4
ENSG00000236333	-1.30498	0.011522	0.99966	13.5075	25.6327	36.2793	59.8485	TRHDE-AS1
ENSG00000237441	0.307611	0.0435605	0.99966	1635.44	1823.42	1343.22	1451.1	RGL2
ENSG00000237686	0.691362	0.0205714	0.99966	123.645	110.687	75.2131	69.9767	AL109615.3
ENSG00000238227	-0.317221	0.0371654	0.99966	2677.6	2230.04	3012.07	3103.83	TMEM250
ENSG00000241837	0.379662	0.0358259	0.99966	523.675	582.561	403.496	446.562	ATP5PO
ENSG00000243244	0.40968	0.0463604	0.99966	374.053	474.205	345.98	291.876	STON1
ENSG00000243646	0.416069	0.018045	0.99966	751.224	840.053	542.42	650.047	IL10RB
ENSG00000243649	0.430578	0.0125612	0.99966	1308.15	1520.49	1168.02	929.953	CFB
ENSG00000245694	0.761396	0.0448015	0.99966	100.787	60.5864	53.9765	41.4336	CRNDE
ENSG00000246898	0.671944	0.0284632	0.99966	124.684	111.852	85.8315	62.6107	LINC00920
ENSG00000247095	0.459797	0.0235225	0.99966	408.342	336.72	276.961	265.175	MIR210HG
ENSG00000248323	1.05065	0.0130391	0.99966	82.0839	53.5956	40.7036	24.8601	LUCAT1
ENSG00000249395	0.579473	0.01724	0.99966	208.847	242.346	169.893	131.667	CASC9
ENSG00000250461	0.863472	0.0485025	0.99966	51.9519	51.2654	32.7398	23.9394	AC122718.1
ENSG00000250920	0.367311	0.0263072	0.99966	2264.06	2961.74	2048.45	2001.7	AC105460.1
ENSG00000253659	1.27972	0.0112804	0.99966	34.2882	55.9259	16.8124	20.2564	AC138646.1
ENSG00000253729	-0.31801	0.024596	0.99966	3929.64	4366.88	5295.89	5045.69	PRKDC
ENSG00000253982	0.873212	0.0396146	0.99966	55.069	55.9259	25.661	34.9883	AC100810.1
ENSG00000256463	-1.62243	0.0421962	0.99966	7.27326	4.66049	19.4669	17.4942	SALL3
ENSG00000261040	0.314019	0.0378382	0.99966	1669.73	1515.82	1306.94	1255.9	WFDC21P
ENSG00000261150	-0.340202	0.035953	0.99966	1532.58	1824.58	1956.43	2292.66	EPPK1
ENSG00000261780	0.292223	0.0465401	0.99966	2145.61	2360.54	1882.98	1796.38	LINC02582
ENSG00000268621	0.425552	0.0180373	0.99966	837.464	1052.11	648.603	757.774	IGFL2-AS1
ENSG00000269994	0.52122	0.0320301	0.99966	189.105	249.336	151.311	153.765	AL513318.2
ENSG00000272333	-0.312634	0.0414808	0.99966	935.134	949.575	1153.86	1186.84	KMT2B
ENSG00000272674	1.21761	0.0278304	0.99966	32.2102	34.9537	15.0426	13.8112	PCDHB16
ENSG00000275700	-0.408235	0.024335	0.99966	487.309	419.444	570.735	633.473	AATF
ENSG00000276023	-0.355945	0.0264898	0.99966	800.059	837.723	991.044	1104.9	DUSP14
ENSG00000278259	-0.454431	0.0128417	0.99966	427.044	390.316	596.396	523.904	MYO19
ENSG00000283498	1.08231	0.0298755	0.99966	44.6786	37.2839	21.2367	17.4942	MIR1244-2
ENSG00000000419	-0.0303322	0.855136	0.99966	679.53	637.322	683.997	661.096	DPM1
ENSG00000000457	0.287288	0.30248	0.99966	117.411	138.65	97.3347	112.331	SCYL3
ENSG00000000460	0.109689	0.682139	0.99966	132.997	130.494	132.729	111.41	C1orf112
ENSG00000001036	0.0953755	0.535881	0.99966	1772.6	1901.48	1590.98	1847.94	FUCA2
ENSG00000001084	-0.0487157	0.740777	0.99966	1618.82	1640.49	1623.72	1747.58	GCLC
ENSG00000001167	-0.161421	0.360547	0.99966	544.456	533.626	649.488	556.131	NFYA
ENSG00000001460	-0.0715479	0.708784	0.99966	353.273	327.399	360.138	355.408	STPG1
ENSG00000001461	-0.0655067	0.655237	0.99966	1912.87	2128.68	2121.01	2107.59	NIPAL3
ENSG00000001497	-0.151433	0.426706	0.99966	397.951	362.353	392.878	452.086	LAS1L
ENSG00000001561	0.369092	0.268412	0.99966	86.2401	120.008	61.9402	97.5991	ENPP4
ENSG00000001617	0.228805	0.148609	0.99966	1236.45	1084.73	977.771	1003.61	SEMA3F
ENSG00000001629	-0.0105111	0.943328	0.99966	1531.54	1653.31	1593.63	1614.07	ANKIB1
ENSG00000001630	-0.346104	0.319262	0.99966	57.1471	73.4027	68.1343	97.5991	CYP51A1
ENSG00000001631	0.0251496	0.879023	0.99966	803.176	942.584	852.121	862.739	KRIT1
ENSG00000002016	0.137989	0.622391	0.99966	109.099	122.338	108.838	101.282	RAD52
ENSG00000002079	0.101558	0.812148	0.99966	36.3663	54.7608	47.7825	36.8298	MYH16
ENSG00000002330	0.228741	0.283631	0.99966	408.342	298.271	300.853	302.925	BAD
ENSG00000002549	-0.261014	0.17651	0.99966	670.179	531.296	806.993	633.473	LAP3
ENSG00000002586	0.303548	0.0549763	0.99966	8519.07	6997.73	5767.52	6806.15	CD99
ENSG00000002587	0.213344	0.179086	0.99966	1760.13	1494.85	1336.14	1472.27	HS3ST1
ENSG00000002746	-0.155955	0.842961	0.99966	8.3123	12.8163	12.388	11.049	HECW1
ENSG00000002822	-0.218166	0.209869	0.99966	651.476	553.433	725.586	676.748	MAD1L1
ENSG00000002834	-0.197436	0.166445	0.99966	5848.74	5614.73	6136.51	7008.72	LASP1
ENSG00000002919	-0.0930782	0.661155	0.99966	251.447	262.153	249.531	298.322	SNX11
ENSG00000003056	-0.179327	0.2395	0.99966	1047.35	1109.2	1231.73	1209.86	M6PR
ENSG00000003096	0.256041	0.471559	0.99966	87.2791	62.9166	72.5586	53.4033	KLHL13
ENSG00000003137	-0.151833	0.414939	0.99966	382.366	374.004	439.776	400.524	CYP26B1
ENSG00000003147	0.340374	0.20351	0.99966	129.88	152.631	111.492	111.41	ICA1
ENSG00000003249	0.24966	0.359375	0.99966	144.426	121.173	116.802	106.807	DBNDD1
ENSG00000003393	-0.165146	0.394749	0.99966	311.711	350.702	383.145	359.091	ALS2
ENSG00000003400	0.228328	0.189509	0.99966	1133.59	1389.99	975.116	1178.55	CASP10
ENSG00000003402	0.0717174	0.621812	0.99966	2229.77	2458.41	2267.9	2192.3	CFLAR
ENSG00000003436	0.17283	0.351448	0.99966	416.654	473.04	391.993	396.841	TFPI
ENSG00000003509	-0.106941	0.705848	0.99966	99.7476	111.852	105.298	122.459	NDUFAF7
ENSG00000003756	0.0370838	0.82086	0.99966	790.707	871.512	843.272	776.189	RBM5
ENSG00000003989	0.465659	0.344546	0.99966	32.2102	44.2747	20.3518	34.9883	SLC7A2
ENSG00000004059	0.0758518	0.638075	0.99966	1353.87	1187.26	1126.43	1285.36	ARF5
ENSG00000004139	-0.463751	0.425995	0.99966	15.5856	19.8071	25.661	23.0186	SARM1
ENSG00000004142	-0.200841	0.2015	0.99966	873.83	855.2	962.728	1024.79	POLDIP2
ENSG00000004455	-0.109149	0.498435	0.99966	885.26	791.118	898.133	910.618	AK2
ENSG00000004487	0.042169	0.760523	0.99966	6463.85	6941.8	6294.01	6725.13	KDM1A
ENSG00000004534	-0.0185214	0.917327	0.99966	849.933	785.293	931.758	724.627	RBM6
ENSG00000004660	-0.115467	0.657481	0.99966	153.778	123.503	140.693	160.21	CAMKK1
ENSG00000004700	-0.0427056	0.83005	0.99966	342.882	312.253	361.023	313.974	RECQL
ENSG00000004766	0.0236489	0.894261	0.99966	494.582	545.277	534.456	487.995	VPS50
ENSG00000004777	0.0180149	0.960513	0.99966	89.3572	64.0817	96.4498	55.2448	ARHGAP33
ENSG00000004779	0.0736433	0.690934	0.99966	602.642	491.682	492.867	547.844	NDUFAB1
ENSG00000004838	0.341295	0.660796	0.99966	13.5075	11.6512	8.84861	11.049	ZMYND10
ENSG00000004864	-0.116773	0.490484	0.99966	694.077	777.137	745.937	848.928	SLC25A13
ENSG00000004866	-0.0468538	0.829053	0.99966	224.432	255.162	231.833	263.333	ST7
ENSG00000004897	-0.040919	0.798453	0.99966	988.124	1049.78	979.541	1116.86	CDC27
ENSG00000004961	-0.216897	0.235421	0.99966	455.098	397.307	484.019	507.331	HCCS
ENSG00000004975	-0.148579	0.397928	0.99966	475.879	456.728	523.837	510.093	DVL2
ENSG00000005001	0.0537485	0.697486	0.99966	3293.75	3235.55	3153.64	3136.98	PRSS22
ENSG00000005020	0.260842	0.104894	0.99966	831.23	876.172	717.622	707.133	SKAP2
ENSG00000005022	0.00322343	0.983111	0.99966	3857.95	3317.1	3350.97	3809.13	SLC25A5
ENSG00000005059	0.195656	0.497178	0.99966	120.528	101.366	98.2195	95.7576	MCUB
ENSG00000005075	-0.337789	0.110654	0.99966	1136.71	686.257	1106.96	1198.81	POLR2J
ENSG00000005100	-0.108629	0.549926	0.99966	414.576	401.967	447.739	432.751	DHX33
ENSG00000005102	0.279512	0.668169	0.99966	20.7807	27.9629	7.96375	32.2261	MEOX1
ENSG00000005108	-0.264012	0.730077	0.99966	13.5075	8.15586	14.1578	11.9697	THSD7A
ENSG00000005175	-0.0726464	0.692984	0.99966	419.771	385.656	424.733	422.622	RPAP3
ENSG00000005189	0.0997791	0.7408	0.99966	102.865	88.5493	84.9466	93.9161	REXO5
ENSG00000005194	0.0206414	0.901521	0.99966	651.476	650.138	620.287	662.937	CIAPIN1
ENSG00000005206	-0.0471234	0.779893	0.99966	586.017	605.864	630.906	600.326	SPPL2B
ENSG00000005238	-0.141162	0.492816	0.99966	314.828	277.299	299.083	354.487	FAM214B
ENSG00000005243	-0.156543	0.470855	0.99966	244.174	216.713	239.797	274.382	COPZ2
ENSG00000005249	-0.111905	0.799972	0.99966	36.3663	37.2839	34.5096	45.1165	PRKAR2B
ENSG00000005302	0.148704	0.402408	0.99966	531.987	546.443	515.874	456.69	MSL3
ENSG00000005339	-0.222461	0.177339	0.99966	1282.17	1634.67	1712.21	1689.57	CREBBP
ENSG00000005436	0.0285719	0.921404	0.99966	96.6305	106.026	99.1044	99.4406	GCFC2
ENSG00000005448	0.297538	0.124627	0.99966	483.152	396.142	347.75	368.298	WDR54
ENSG00000005483	0.0819779	0.627937	0.99966	946.563	1032.3	1026.44	842.483	KMT2E
ENSG00000005486	-0.0995072	0.518108	0.99966	1203.21	1104.54	1203.41	1269.71	RHBDD2
ENSG00000005513	0.458059	0.419766	0.99966	21.8198	30.2932	21.2367	16.5734	SOX8
ENSG00000005700	-0.0198353	0.921	0.99966	428.083	602.368	511.449	532.191	IBTK
ENSG00000005801	0.113166	0.553885	0.99966	386.522	429.93	401.727	352.646	ZNF195
ENSG00000005810	-0.0953149	0.597783	0.99966	550.69	696.743	651.257	680.431	MYCBP2
ENSG00000005812	0.0992235	0.628498	0.99966	290.93	280.795	279.616	254.126	FBXL3
ENSG00000005882	0.00597526	0.973996	0.99966	475.879	424.105	431.812	464.977	PDK2
ENSG00000005884	-0.222048	0.0958946	0.99966	13163.6	13029.6	15663.8	14887.5	ITGA3
ENSG00000005889	0.0892446	0.61341	0.99966	764.731	883.163	851.236	697.005	ZFX
ENSG00000006007	0.205353	0.178187	0.99966	1968.98	2230.04	1727.25	1914.23	GDE1
ENSG00000006015	0.00961138	0.957883	0.99966	460.294	419.444	443.315	430.909	REX1BD
ENSG00000006016	0.125907	0.665912	0.99966	187.027	108.356	141.578	129.825	CRLF1
ENSG00000006025	0.140858	0.532612	0.99966	216.12	256.327	230.949	197.04	OSBPL7
ENSG00000006042	-0.668398	0.214861	0.99966	24.9369	15.1466	33.6247	30.3846	TMEM98
ENSG00000006047	0.136231	0.495779	0.99966	448.864	376.335	412.345	338.834	YBX2
ENSG00000006059	-0.110015	0.889407	0.99966	10.3904	10.4861	12.388	10.1282	KRT33A
ENSG00000006062	0.0792985	0.697916	0.99966	277.423	297.106	261.919	281.748	MAP3K14
ENSG00000006125	0.0743698	0.605482	0.99966	2490.57	2468.89	2248.43	2462.07	AP2B1
ENSG00000006194	-0.0865278	0.665101	0.99966	299.243	280.795	315.895	300.163	ZNF263
ENSG00000006282	0.137403	0.379232	0.99966	1063.97	1158.13	981.31	1038.6	SPATA20
ENSG00000006283	0.162752	0.767777	0.99966	27.015	23.3025	26.5458	18.4149	CACNA1G
ENSG00000006327	-0.0570898	0.69748	0.99966	2993.47	2776.49	3181.96	2821.17	TNFRSF12A
ENSG00000006377	0.561278	0.353967	0.99966	35.3273	17.4768	23.0064	12.8904	DLX6
ENSG00000006432	-0.133367	0.388491	0.99966	1085.79	1129	1271.54	1157.38	MAP3K9
ENSG00000006451	0.0297404	0.84798	0.99966	1121.12	1061.43	1106.96	1031.24	RALA
ENSG00000006453	0.175808	0.221684	0.99966	2259.91	2181.11	2020.14	1911.47	BAIAP2L1
ENSG00000006459	-0.177859	0.461887	0.99966	149.621	192.245	197.324	188.753	KDM7A
ENSG00000006468	-0.606222	0.249842	0.99966	15.5856	29.1281	34.5096	33.1469	ETV1
ENSG00000006530	-0.125212	0.601089	0.99966	154.817	165.447	177.857	171.259	AGK
ENSG00000006534	-0.00850446	0.959631	0.99966	1088.91	955.401	1116.69	940.082	ALDH3B1
ENSG00000006555	0.0559425	0.790198	0.99966	367.819	281.96	300.853	325.023	TTC22
ENSG00000006576	0.0608247	0.755804	0.99966	334.57	374.004	356.599	322.261	PHTF2
ENSG00000006606	0.275476	0.526356	0.99966	50.9128	48.9352	28.3155	54.324	CCL26
ENSG00000006607	0.111168	0.637303	0.99966	202.612	253.997	186.706	235.711	FARP2
ENSG00000006625	-0.232603	0.1963	0.99966	507.05	433.426	545.959	559.814	GGCT
ENSG00000006634	0.0354817	0.862333	0.99966	401.068	315.748	329.168	371.061	DBF4
ENSG00000006652	0.0395304	0.816452	0.99966	646.281	653.634	671.609	592.96	IFRD1
ENSG00000006695	0.207901	0.446514	0.99966	137.153	138.65	102.644	136.27	COX10
ENSG00000006704	-0.222199	0.253831	0.99966	303.399	349.537	370.757	390.396	GTF2IRD1
ENSG00000006712	-0.232701	0.191762	0.99966	772.005	601.203	799.914	814.86	PAF1
ENSG00000006715	0.00850165	0.957797	0.99966	843.698	868.016	889.285	812.098	VPS41
ENSG00000006740	-0.0247529	0.946556	0.99966	68.5765	52.4305	70.7888	52.4825	ARHGAP44
ENSG00000006744	-0.235196	0.124517	0.99966	1114.89	1101.04	1247.65	1360.86	ELAC2
ENSG00000006747	-0.363888	0.4559	0.99966	21.8198	33.7886	36.2793	34.9883	SCIN
ENSG00000006757	0.159191	0.334709	0.99966	897.728	794.614	734.434	781.713	PNPLA4
ENSG00000006831	-0.157322	0.361191	0.99966	988.124	1120.85	1043.25	1308.38	ADIPOR2
ENSG00000006837	-0.115405	0.84057	0.99966	25.9759	16.3117	23.8912	22.0979	CDKL3
ENSG00000007047	-0.0957676	0.601993	0.99966	469.645	406.628	461.012	476.026	MARK4
ENSG00000007080	-0.126261	0.481341	0.99966	787.59	659.459	716.737	863.66	CCDC124
ENSG00000007168	0.0224903	0.873792	0.99966	2477.06	2400.15	2446.64	2355.27	PAFAH1B1
ENSG00000007202	-0.256698	0.118145	0.99966	960.07	1180.27	1271.54	1284.44	KIAA0100
ENSG00000007237	-0.244225	0.35194	0.99966	171.441	120.008	162.814	183.228	GAS7
ENSG00000007255	0.0421322	0.853822	0.99966	240.018	192.245	215.906	204.406	TRAPPC6A
ENSG00000007264	-0.234612	0.677847	0.99966	20.7807	19.8071	25.661	22.0979	MATK
ENSG00000007341	-0.194038	0.441144	0.99966	135.075	133.989	151.311	156.527	ST7L
ENSG00000007372	0.11366	0.628893	0.99966	195.339	181.759	163.699	185.07	PAX6
ENSG00000007376	-0.284656	0.122846	0.99966	427.044	370.509	479.594	492.599	RPUSD1
ENSG00000007384	-0.0812169	0.589489	0.99966	1226.06	1303.77	1356.49	1319.43	RHBDF1
ENSG00000007392	0.0615587	0.731347	0.99966	644.203	650.138	687.537	552.448	LUC7L
ENSG00000007402	-0.495363	0.561601	0.99966	7.27326	9.32098	15.9275	7.36597	CACNA2D2
ENSG00000007516	0.431713	0.0735911	0.99966	420.81	309.923	325.629	216.375	BAIAP3
ENSG00000007520	-0.193914	0.343839	0.99966	711.741	471.875	657.451	697.925	TSR3
ENSG00000007541	-0.0512809	0.748574	0.99966	1031.76	1004.34	1128.2	981.515	PIGQ
ENSG00000007545	-0.0905213	0.629307	0.99966	376.132	356.528	399.072	381.189	CRAMP1
ENSG00000007866	-0.144633	0.328083	0.99966	1618.82	1754.67	1917.49	1811.11	TEAD3
ENSG00000007923	-0.242379	0.206331	0.99966	313.789	343.711	376.951	400.524	DNAJC11
ENSG00000007944	0.255224	0.212582	0.99966	305.477	362.353	292.004	267.016	MYLIP
ENSG00000007968	-0.43339	0.110236	0.99966	151.699	101.366	179.627	162.972	E2F2
ENSG00000008018	0.012581	0.93455	0.99966	3457.92	3086.41	2976.67	3511.72	PSMB1
ENSG00000008083	-0.0362498	0.807779	0.99966	1745.58	1894.49	1945.81	1786.25	JARID2
ENSG00000008086	-0.013444	0.955666	0.99966	165.207	220.208	184.051	204.406	CDKL5
ENSG00000008118	-0.103374	0.896723	0.99966	8.3123	12.8163	9.73347	12.8904	CAMK1G
ENSG00000008128	0.124007	0.545607	0.99966	287.813	272.639	255.725	258.73	CDK11A
ENSG00000008130	-0.241529	0.136016	0.99966	908.119	788.788	1005.2	1001.77	NADK
ENSG00000008226	-0.0967313	0.902242	0.99966	15.5856	6.99074	14.1578	10.1282	DLEC1
ENSG00000008256	-0.214616	0.197708	0.99966	872.791	1036.96	1045.02	1170.27	CYTH3
ENSG00000008277	-0.193253	0.544554	0.99966	81.0449	68.7422	84.9466	86.5501	ADAM22
ENSG00000008282	0.234844	0.109432	0.99966	2321.21	2375.69	1885.64	2105.75	SYPL1
ENSG00000008283	-0.151739	0.351533	0.99966	1258.27	1401.64	1341.45	1613.15	CYB561
ENSG00000008294	-0.107405	0.506293	0.99966	1428.68	1783.8	1716.63	1742.97	SPAG9
ENSG00000008300	-0.0227705	0.927517	0.99966	152.738	144.475	159.275	142.716	CELSR3
ENSG00000008311	0.401244	0.438478	0.99966	22.8588	45.4398	24.7761	26.7016	AASS
ENSG00000008323	0.0981696	0.701194	0.99966	139.231	160.787	131.844	148.24	PLEKHG6
ENSG00000008324	0.128042	0.716721	0.99966	100.787	58.2561	77.8677	68.1352	SS18L2
ENSG00000008382	-0.416388	0.200047	0.99966	67.5374	62.9166	85.8315	88.3916	MPND
ENSG00000008405	-0.265271	0.156159	0.99966	343.921	337.886	407.036	412.494	CRY1
ENSG00000008441	-0.221898	0.207251	0.99966	537.182	477.7	612.324	571.783	NFIX
ENSG00000008513	-0.291321	0.056742	0.99966	1152.29	1267.65	1436.13	1524.76	ST3GAL1
ENSG00000008516	-0.185419	0.647603	0.99966	36.3663	53.5956	51.3219	50.641	MMP25
ENSG00000008517	-0.172868	0.45368	0.99966	491.465	311.088	505.255	400.524	IL32
ENSG00000008710	-0.0589549	0.708952	0.99966	839.542	873.842	878.667	906.014	PKD1
ENSG00000008735	-0.00437757	0.988046	0.99966	110.138	102.531	121.226	92.0746	MAPK8IP2
ENSG00000008838	0.036846	0.820897	0.99966	967.344	841.219	875.127	888.52	MED24
ENSG00000008853	-0.0256185	0.907973	0.99966	299.243	243.511	307.931	244.918	RHOBTB2
ENSG00000008869	0.0311438	0.883353	0.99966	334.57	480.031	416.769	379.347	HEATR5B
ENSG00000008988	-0.0301769	0.874549	0.99966	8734.15	5591.42	6984.2	7645.87	RPS20
ENSG00000009307	0.0484294	0.719084	0.99966	6304.88	6460.61	6142.7	6201.22	CSDE1
ENSG00000009335	-0.165917	0.32857	0.99966	574.588	634.992	699.925	656.492	UBE3C
ENSG00000009413	-0.0401579	0.86192	0.99966	199.495	247.006	252.185	206.247	REV3L
ENSG00000009709	-0.179015	0.44853	0.99966	164.168	167.778	177.857	197.96	PAX7
ENSG00000009724	0.660556	0.388692	0.99966	14.5465	13.9815	8.84861	9.20746	MASP2
ENSG00000009780	0.0407727	0.86928	0.99966	160.012	180.594	147.772	183.228	FAM76A
ENSG00000009790	0.109574	0.82312	0.99966	34.2882	27.9629	27.4307	30.3846	TRAF3IP3
ENSG00000009830	-0.235883	0.171174	0.99966	497.699	535.956	622.942	593.881	POMT2
ENSG00000009844	0.143448	0.369312	0.99966	1010.98	928.603	846.812	909.697	VTA1
ENSG00000009950	0.392471	0.220613	0.99966	92.4743	85.054	69.0191	66.2937	MLXIPL
ENSG00000009954	-0.225616	0.145527	0.99966	1153.33	1038.12	1253.85	1309.3	BAZ1B
ENSG00000010017	-0.115027	0.49342	0.99966	744.99	856.365	818.496	915.221	RANBP9
ENSG00000010030	-0.0905302	0.762398	0.99966	97.6695	85.054	102.644	92.0746	ETV7
ENSG00000010072	-0.052228	0.828048	0.99966	161.051	170.108	161.929	181.387	SPRTN
ENSG00000010165	-0.219386	0.216368	0.99966	484.191	438.086	528.262	546.002	METTL13
ENSG00000010219	-0.0556935	0.85668	0.99966	102.865	78.0632	99.9892	88.3916	DYRK4
ENSG00000010244	-0.0254683	0.866263	0.99966	1515.96	1603.21	1502.49	1672.07	ZNF207
ENSG00000010256	0.113797	0.513517	0.99966	1955.47	1863.03	1492.76	2036.69	UQCRC1
ENSG00000010270	0.318331	0.10256	0.99966	360.546	351.867	280.501	290.956	STARD3NL
ENSG00000010292	0.0420124	0.795569	0.99966	3356.09	2889.5	2710.33	3357.04	NCAPD2
ENSG00000010310	0.0880195	0.761604	0.99966	118.45	113.017	126.535	91.1538	GIPR
ENSG00000010318	0.432394	0.248709	0.99966	60.2642	64.0817	44.243	47.8788	PHF7
ENSG00000010322	0.160563	0.363402	0.99966	496.66	499.838	448.624	442.879	NISCH
ENSG00000010404	0.016541	0.918661	0.99966	937.212	1099.88	1014.05	999.009	IDS
ENSG00000010539	-0.0281999	0.902025	0.99966	203.651	181.759	201.748	191.515	ZNF200
ENSG00000010626	0.411197	0.198971	0.99966	102.865	85.054	76.9829	64.4522	LRRC23
ENSG00000010704	0.359542	0.118745	0.99966	235.861	263.318	169.893	219.138	HFE
ENSG00000010803	0.209484	0.405376	0.99966	209.886	175.934	192.015	141.795	SCMH1
ENSG00000010810	-0.393669	0.0922894	0.99966	190.144	165.447	257.494	209.93	FYN
ENSG00000010818	0.051863	0.795768	0.99966	438.474	603.534	532.686	471.422	HIVEP2
ENSG00000011007	-0.0496938	0.767234	0.99966	614.071	589.552	630.906	615.058	ELOA
ENSG00000011009	-0.030919	0.855383	0.99966	1206.32	960.061	1065.37	1149.09	LYPLA2
ENSG00000011021	0.0303937	0.906695	0.99966	196.378	319.244	215.021	289.114	CLCN6
ENSG00000011028	-0.0826641	0.816411	0.99966	58.1861	59.4213	62.8251	61.69	MRC2
ENSG00000011052	0.823847	0.249864	0.99966	16.6246	18.642	7.96375	11.9697	NME1-NME2
ENSG00000011105	0.0184843	0.923347	0.99966	344.96	353.032	330.938	358.17	TSPAN9
ENSG00000011114	-0.0694429	0.702149	0.99966	553.807	709.56	666.3	658.333	BTBD7
ENSG00000011132	0.117426	0.667542	0.99966	173.519	143.31	174.318	117.855	APBA3
ENSG00000011143	0.127367	0.514288	0.99966	325.219	347.207	309.701	305.688	MKS1
ENSG00000011198	-0.00504837	0.98371	0.99966	149.621	191.08	162.814	178.625	ABHD5
ENSG00000011201	0.0165962	0.926071	0.99966	669.14	830.732	789.296	692.401	ANOS1
ENSG00000011243	0.0225806	0.887163	0.99966	829.152	884.328	846.812	839.72	AKAP8L
ENSG00000011258	0.0824651	0.693591	0.99966	269.111	333.225	292.004	276.224	MBTD1
ENSG00000011260	-0.164507	0.396303	0.99966	330.414	302.932	356.599	353.566	UTP18
ENSG00000011275	-0.102325	0.532788	0.99966	891.494	919.282	1049.44	894.044	RNF216
ENSG00000011295	0.0909133	0.579805	0.99966	710.702	718.881	688.422	653.73	TTC19
ENSG00000011304	-0.138059	0.331429	0.99966	3710.4	3842.57	3931.44	4379.99	PTBP1
ENSG00000011332	-0.80305	0.116756	0.99966	33.2492	13.9815	40.7036	42.3543	DPF1
ENSG00000011347	0.121601	0.578636	0.99966	236.901	223.704	203.518	220.058	SYT7
ENSG00000011376	-0.14737	0.512294	0.99966	185.988	209.722	211.482	226.503	LARS2
ENSG00000011405	-0.105624	0.547858	0.99966	627.579	772.476	722.931	782.634	PIK3C2A
ENSG00000011426	0.219116	0.130055	0.99966	5876.8	5065.95	4633.13	4768.54	ANLN
ENSG00000011451	-0.143343	0.361398	0.99966	1018.26	920.447	1062.72	1079.11	WIZ
ENSG00000011454	-0.0409022	0.795761	0.99966	1548.17	1887.5	1758.22	1775.2	RABGAP1
ENSG00000011478	0.175751	0.414312	0.99966	245.213	241.18	209.712	220.979	QPCTL
ENSG00000011485	-0.206539	0.232713	0.99966	850.972	686.257	917.6	857.214	PPP5C
ENSG00000011523	0.204697	0.464016	0.99966	114.294	136.319	117.686	99.4406	CEP68
ENSG00000011566	0.0177208	0.924865	0.99966	382.366	445.077	406.151	410.653	MAP4K3
ENSG00000011590	-0.958235	0.199598	0.99966	7.27326	10.4861	15.0426	19.3357	ZBTB32
ENSG00000012048	-0.299779	0.161059	0.99966	272.228	216.713	307.047	295.559	BRCA1
ENSG00000012061	0.0589508	0.751921	0.99966	410.42	380.995	376.066	383.951	ERCC1
ENSG00000012124	-0.085423	0.623341	0.99966	863.44	1070.75	1099.88	951.131	CD22
ENSG00000012171	-0.0485765	0.767036	0.99966	1838.06	1666.13	2013.06	1611.31	SEMA3B
ENSG00000012174	0.0313916	0.884607	0.99966	257.681	336.72	272.537	308.45	MBTPS2
ENSG00000012211	0.103507	0.630921	0.99966	231.705	244.676	216.791	226.503	PRICKLE3
ENSG00000012232	-0.0658316	0.695369	0.99966	757.458	872.677	805.223	900.49	EXTL3
ENSG00000012660	-0.0340696	0.839569	0.99966	1645.84	2002.85	1686.54	2048.66	ELOVL5
ENSG00000012779	0.161007	0.39877	0.99966	468.606	400.802	409.69	368.298	ALOX5
ENSG00000012822	0.0631196	0.686893	0.99966	1440.11	1518.15	1525.5	1305.62	CALCOCO1
ENSG00000012963	-0.216661	0.234541	0.99966	434.318	397.307	501.716	464.977	UBR7
ENSG00000012983	0.0782394	0.637173	0.99966	701.35	682.762	632.675	678.59	MAP4K5
ENSG00000013016	-0.0277768	0.942748	0.99966	58.1861	44.2747	52.2068	52.4825	EHD3
ENSG00000013275	-0.244078	0.169429	0.99966	889.416	702.569	882.206	1004.53	PSMC4
ENSG00000013288	-0.00116513	0.994314	0.99966	739.795	810.925	794.605	756.853	MAN2B2
ENSG00000013297	0.069221	0.935473	0.99966	12.4684	8.15586	14.1578	5.52448	CLDN11
ENSG00000013306	-0.218512	0.160738	0.99966	1072.29	971.712	1213.14	1165.66	SLC25A39
ENSG00000013364	-0.00613087	0.965134	0.99966	3641.83	3601.39	3486.35	3787.95	MVP
ENSG00000013374	-0.0296942	0.857853	0.99966	697.194	645.478	681.343	689.639	NUB1
ENSG00000013375	0.178639	0.319602	0.99966	464.45	485.856	414.115	425.385	PGM3
ENSG00000013392	0.0549109	0.856732	0.99966	94.5524	99.0354	80.5223	105.886	RWDD2A
ENSG00000013441	0.297429	0.0633077	0.99966	946.563	1056.77	819.381	810.256	CLK1
ENSG00000013503	-0.207768	0.333994	0.99966	243.135	302.932	287.58	342.517	POLR3B
ENSG00000013523	-0.0909651	0.678455	0.99966	240.018	280.795	245.991	308.45	ANGEL1
ENSG00000013561	0.0446244	0.803532	0.99966	457.176	498.673	475.17	451.165	RNF14
ENSG00000013563	0.148937	0.363816	0.99966	738.756	748.009	649.488	691.48	DNASE1L1
ENSG00000013573	-0.257216	0.222476	0.99966	384.444	308.758	468.091	360.932	DDX11
ENSG00000013583	-0.0306464	0.881917	0.99966	408.342	308.758	350.405	383.03	HEBP1
ENSG00000013588	0.272785	0.0835688	0.99966	15073.3	19239.7	13503	14897.7	GPRC5A
ENSG00000013725	-0.17393	0.826119	0.99966	10.3904	10.4861	8.84861	14.7319	CD6
ENSG00000013810	-0.0443727	0.815611	0.99966	1805.85	1209.4	1504.26	1606.7	TACC3
ENSG00000014138	-0.201967	0.31297	0.99966	445.747	334.39	461.012	437.354	POLA2
ENSG00000014164	0.0520113	0.751512	0.99966	699.272	753.834	706.119	695.163	ZC3H3
ENSG00000014216	0.0346056	0.804815	0.99966	9863.58	9486.43	8876.92	10015	CAPN1
ENSG00000014257	0.203327	0.518289	0.99966	111.177	189.915	100.874	160.21	ACPP
ENSG00000014641	0.152058	0.345376	0.99966	891.494	941.419	784.871	864.58	MDH1
ENSG00000014824	0.0436271	0.800118	0.99966	540.299	575.571	531.801	550.606	SLC30A9
ENSG00000014914	0.270907	0.285101	0.99966	153.778	199.236	153.966	138.112	MTMR11
ENSG00000014919	0.131303	0.471224	0.99966	594.329	700.239	538.88	642.681	COX15
ENSG00000015153	-0.0427072	0.864734	0.99966	142.348	182.924	176.087	158.368	YAF2
ENSG00000015171	0.0213328	0.909258	0.99966	394.834	390.316	405.266	368.298	ZMYND11
ENSG00000015475	0.0875831	0.619912	0.99966	732.521	760.825	624.712	780.793	BID
ENSG00000015479	-0.121474	0.69572	0.99966	73.7717	102.531	95.5649	95.7576	MATR3
ENSG00000015532	-0.0365561	0.816009	0.99966	933.056	913.456	977.771	916.142	XYLT2
ENSG00000015676	-0.206964	0.181561	0.99966	1472.32	1282.8	1642.3	1538.57	NUDCD3
ENSG00000016391	0.561726	0.48502	0.99966	11.4294	13.9815	7.07888	10.1282	CHDH
ENSG00000016402	-0.174499	0.694159	0.99966	33.2492	37.2839	36.2793	43.2751	IL20RA
ENSG00000016602	-0.339495	0.174501	0.99966	136.114	126.998	163.699	169.417	CLCA4
ENSG00000016864	0.00348657	0.984123	0.99966	504.972	531.296	535.341	498.124	GLT8D1
ENSG00000017260	-0.0405949	0.791255	0.99966	1420.36	1637	1556.47	1587.37	ATP2C1
ENSG00000017483	0.104279	0.894008	0.99966	12.4684	11.6512	15.0426	7.36597	SLC38A5
ENSG00000017797	0.046372	0.77753	0.99966	818.761	771.311	731.78	808.415	RALBP1
ENSG00000018189	0.0203817	0.9224	0.99966	247.291	265.648	247.761	257.809	RUFY3
ENSG00000018236	-0.174676	0.663025	0.99966	43.6396	78.0632	50.4371	86.5501	CNTN1
ENSG00000018408	-0.00874412	0.965402	0.99966	316.906	367.014	371.641	315.816	WWTR1
ENSG00000018510	-0.142729	0.371861	0.99966	749.146	773.641	848.581	832.354	AGPS
ENSG00000018610	-0.0663399	0.736381	0.99966	390.678	350.702	424.733	351.725	CXorf56
ENSG00000018699	-0.474468	0.0722385	0.99966	108.06	108.356	145.117	155.606	TTC27
ENSG00000018869	-0.304852	0.554635	0.99966	25.9759	22.1373	30.9701	28.5431	ZNF582
ENSG00000019144	-0.141342	0.420134	0.99966	752.263	824.907	965.383	773.427	PHLDB1
ENSG00000019169	-0.109124	0.834811	0.99966	31.1711	30.2932	19.4669	46.958	MARCO
ENSG00000019186	-0.542111	0.184028	0.99966	33.2492	41.9444	53.0916	56.1655	CYP24A1
ENSG00000019485	0.134945	0.585068	0.99966	191.183	154.961	164.584	151.002	PRDM11
ENSG00000019549	-0.0758534	0.660811	0.99966	664.984	610.524	719.392	625.186	SNAI2
ENSG00000019995	-0.0218614	0.921916	0.99966	253.525	369.344	324.744	306.608	ZRANB1
ENSG00000020129	-0.364476	0.0691786	0.99966	255.603	278.464	356.599	330.548	NCDN
ENSG00000020181	-0.273378	0.136069	0.99966	700.311	899.475	1055.64	876.55	ADGRA2
ENSG00000020256	-0.179506	0.393589	0.99966	308.594	287.785	294.659	381.189	ZFP64
ENSG00000020426	0.0886703	0.656264	0.99966	306.516	301.767	288.465	283.59	MNAT1
ENSG00000020577	-0.157163	0.396449	0.99966	418.732	482.361	533.571	470.501	SAMD4A
ENSG00000020633	-0.408389	0.0875657	0.99966	218.198	156.126	233.603	264.254	RUNX3
ENSG00000020922	0.0407561	0.839081	0.99966	362.624	364.683	393.763	313.054	MRE11
ENSG00000021355	0.120225	0.38896	0.99966	3044.38	3056.12	2749.26	2863.52	SERPINB1
ENSG00000021488	0.922965	0.263131	0.99966	15.5856	11.6512	8.84861	5.52448	SLC7A9
ENSG00000021574	0.222561	0.333501	0.99966	206.768	247.006	179.627	209.009	SPAST
ENSG00000021645	0.297467	0.647476	0.99966	21.8198	23.3025	28.3155	8.28671	NRXN3
ENSG00000021762	-0.064564	0.758385	0.99966	362.624	288.95	371.641	310.291	OSBPL5
ENSG00000021776	-0.107596	0.583003	0.99966	535.104	768.981	714.082	689.639	AQR
ENSG00000022267	0.238855	0.405746	0.99966	110.138	116.512	103.529	88.3916	FHL1
ENSG00000022277	-0.0134743	0.929469	0.99966	1347.63	1269.98	1268.89	1373.75	RTF2
ENSG00000022556	-0.175298	0.234446	0.99966	1621.94	1744.19	1844.05	1956.59	NLRP2
ENSG00000022567	-0.13745	0.512059	0.99966	236.901	236.52	259.264	261.492	SLC45A4
ENSG00000022840	-0.0114188	0.940271	0.99966	1704.02	1775.65	1629.91	1877.4	RNF10
ENSG00000022976	0.0034979	0.988175	0.99966	172.48	222.538	196.439	197.04	ZNF839
ENSG00000023041	0.0543028	0.761121	0.99966	467.567	506.828	482.249	455.769	ZDHHC6
ENSG00000023171	-0.103766	0.811048	0.99966	36.3663	38.449	38.9339	41.4336	GRAMD1B
ENSG00000023191	-0.0919259	0.539345	0.99966	2143.53	1863.03	2118.36	2152.7	RNH1
ENSG00000023228	0.0210762	0.90572	0.99966	587.056	612.855	537.11	645.443	NDUFS1
ENSG00000023287	0.0604866	0.699531	0.99966	1361.14	1603.21	1444.98	1396.77	RB1CC1
ENSG00000023330	-0.0822808	0.681787	0.99966	384.444	306.427	357.484	374.744	ALAS1
ENSG00000023516	-0.228428	0.226175	0.99966	373.014	415.949	494.637	429.068	AKAP11
ENSG00000023572	-0.127728	0.689583	0.99966	100.787	68.7422	98.2195	87.4709	GLRX2
ENSG00000023608	0.0898611	0.694445	0.99966	211.964	200.401	207.942	179.545	SNAPC1
ENSG00000023697	0.20757	0.197485	0.99966	978.773	918.117	782.217	860.897	DERA
ENSG00000023734	-0.0535282	0.716779	0.99966	1895.2	1902.65	1865.29	2076.28	STRAP
ENSG00000023839	0.534664	0.0757568	0.99966	121.567	191.08	89.3709	126.142	ABCC2
ENSG00000023892	0.127279	0.529694	0.99966	332.492	300.602	273.422	306.608	DEF6
ENSG00000023902	-0.478166	0.37415	0.99966	37.4053	15.1466	46.0128	27.6224	PLEKHO1
ENSG00000023909	-0.000852816	0.997107	0.99966	200.534	168.943	182.281	187.832	GCLM
ENSG00000024048	-0.0966278	0.569216	0.99966	1478.55	1964.4	1866.17	1813.87	UBR2
ENSG00000024422	0.0283719	0.852697	0.99966	1834.94	1650.98	1800.69	1617.75	EHD2
ENSG00000024526	0.165283	0.397475	0.99966	524.714	454.398	385.799	487.995	DEPDC1
ENSG00000024862	0.180084	0.370819	0.99966	308.594	314.583	262.804	287.273	CCDC28A
ENSG00000025156	0.168359	0.456694	0.99966	215.081	202.731	182.281	189.674	HSF2
ENSG00000025293	-0.0324525	0.862852	0.99966	557.963	501.003	602.59	480.629	PHF20
ENSG00000025423	0.182323	0.788823	0.99966	17.6636	13.9815	15.0426	12.8904	HSD17B6
ENSG00000025434	0.037005	0.921168	0.99966	73.7717	67.5771	47.7825	90.2331	NR1H3
ENSG00000025708	-0.133336	0.479593	0.99966	631.735	678.101	824.69	611.375	TYMP
ENSG00000025770	-0.193349	0.33665	0.99966	523.675	377.5	537.995	493.52	NCAPH2
ENSG00000025772	0.0809658	0.60326	0.99966	1015.14	963.556	929.988	941.002	TOMM34
ENSG00000025796	-0.0914516	0.573467	0.99966	1138.78	1394.65	1329.06	1369.15	SEC63
ENSG00000025800	-0.120649	0.450528	0.99966	1006.83	1040.45	1033.52	1192.37	KPNA6
ENSG00000026025	-0.617854	0.0514773	0.99966	90.3962	60.5864	128.305	104.044	VIM
ENSG00000026036	0.137721	0.653268	0.99966	92.4743	104.861	101.759	77.3427	RTEL1-TNFRSF6B
ENSG00000026103	0.44216	0.053557	0.99966	271.189	238.85	208.827	166.655	FAS
ENSG00000026297	-0.0356497	0.820987	0.99966	1243.73	1324.74	1221.11	1411.5	RNASET2
ENSG00000026508	0.231326	0.10791	0.99966	10319.7	12105.6	9410.49	9691.77	CD44
ENSG00000026559	-0.328601	0.050584	0.99966	616.149	718.881	843.272	832.354	KCNG1
ENSG00000026652	0.107382	0.703218	0.99966	105.982	150.301	117.686	119.697	AGPAT4
ENSG00000026751	0.66911	0.350133	0.99966	15.5856	17.4768	9.73347	11.049	SLAMF7
ENSG00000026950	0.179483	0.283181	0.99966	813.566	912.291	806.993	716.34	BTN3A1
ENSG00000027001	0.0468698	0.850233	0.99966	153.778	207.392	181.396	167.576	MIPEP
ENSG00000027075	0.0750234	0.719503	0.99966	281.579	309.923	255.725	305.688	PRKCH
ENSG00000027697	0.27477	0.0723741	0.99966	5102.71	6001.55	4266.8	4911.26	IFNGR1
ENSG00000027847	-0.266314	0.178916	0.99966	302.36	294.776	334.477	383.951	B4GALT7
ENSG00000027869	-0.49261	0.153137	0.99966	66.4984	53.5956	96.4498	72.7389	SH2D2A
ENSG00000028116	0.0702567	0.7597	0.99966	187.027	219.043	188.475	197.96	VRK2
ENSG00000028137	0.141367	0.560654	0.99966	202.612	180.594	194.669	152.844	TNFRSF1B
ENSG00000028203	-0.0141553	0.92999	0.99966	1032.8	1210.56	1168.9	1095.69	VEZT
ENSG00000028277	0.0618031	0.86712	0.99966	73.7717	50.1003	62.8251	56.1655	POU2F2
ENSG00000028310	-0.0967419	0.537366	0.99966	1529.46	1330.57	1604.25	1454.78	BRD9
ENSG00000028528	-0.0108136	0.944727	0.99966	1006.83	997.345	970.692	1048.73	SNX1
ENSG00000028839	0.12842	0.488135	0.99966	433.279	404.298	374.296	392.238	TBPL1
ENSG00000029153	-0.173114	0.354914	0.99966	404.186	455.563	520.298	448.403	ARNTL2
ENSG00000029363	0.0271958	0.845995	0.99966	2636.04	2692.6	2632.46	2596.5	BCLAF1
ENSG00000029364	0.0438549	0.785747	0.99966	1173.07	1421.45	1260.93	1254.98	SLC39A9
ENSG00000029534	0.139601	0.324908	0.99966	2291.08	2256.84	2067.92	2060.63	ANK1
ENSG00000029639	0.132879	0.587098	0.99966	172.48	159.622	157.505	145.478	TFB1M
ENSG00000029725	0.0279108	0.875368	0.99966	459.254	487.021	458.358	469.58	RABEP1
ENSG00000029993	-0.0555784	0.753899	0.99966	1132.55	864.521	986.62	1090.16	HMGB3
ENSG00000030066	-0.0630423	0.691646	0.99966	832.269	902.97	900.788	911.538	NUP160
ENSG00000030110	-0.258406	0.185981	0.99966	480.035	549.938	527.377	704.371	BAK1
ENSG00000030419	0.298616	0.0970865	0.99966	658.75	827.237	580.469	627.028	IKZF2
ENSG00000030582	-0.217379	0.101416	0.99966	11964.5	11612.8	13709.1	13702.5	GRN
ENSG00000031003	-0.00811852	0.968961	0.99966	282.618	285.455	312.356	258.73	FAM13B
ENSG00000031081	-0.0795332	0.762334	0.99966	130.919	120.008	132.729	132.587	ARHGAP31
ENSG00000031691	0.0790783	0.779459	0.99966	124.684	113.017	126.535	98.5198	CENPQ
ENSG00000031698	-0.234655	0.116945	0.99966	1289.45	1260.66	1451.17	1549.62	SARS
ENSG00000031823	-0.127924	0.469737	0.99966	462.372	470.71	491.098	528.508	RANBP3
ENSG00000032219	0.228954	0.190858	0.99966	543.417	601.203	492.867	483.392	ARID4A
ENSG00000032389	-0.0992966	0.635781	0.99966	264.955	242.346	258.379	285.431	EIPR1
ENSG00000032444	-0.0332689	0.841611	0.99966	1352.83	1513.49	1307.82	1625.12	PNPLA6
ENSG00000032742	-0.0700586	0.848152	0.99966	56.108	54.7608	58.4008	58.007	IFT88
ENSG00000033011	-0.0632913	0.748501	0.99966	329.375	311.088	315.01	354.487	ALG1
ENSG00000033030	0.0896969	0.611552	0.99966	535.104	533.626	530.916	473.263	ZCCHC8
ENSG00000033050	-0.116381	0.526306	0.99966	383.405	411.288	423.848	437.354	ABCF2
ENSG00000033100	-0.230509	0.127004	0.99966	1202.17	1124.34	1361.8	1368.23	CHPF2
ENSG00000033170	0.260109	0.106282	0.99966	2197.56	2792.8	2073.23	2092.86	FUT8
ENSG00000033178	0.0143512	0.929208	0.99966	891.494	1028.8	949.455	951.131	UBA6
ENSG00000033327	-0.379023	0.397402	0.99966	29.093	39.6142	52.2068	36.8298	GAB2
ENSG00000033627	-0.117371	0.577841	0.99966	507.05	680.432	537.995	749.487	ATP6V0A1
ENSG00000033800	0.0593039	0.725122	0.99966	790.707	812.091	833.539	704.371	PIAS1
ENSG00000033867	-0.326781	0.31569	0.99966	69.6155	68.7422	77.8677	95.7576	SLC4A7
ENSG00000034053	-0.387193	0.424247	0.99966	25.9759	27.9629	31.855	38.6713	APBA2
ENSG00000034152	0.0619862	0.685688	0.99966	1251	1165.12	1129.97	1185	MAP2K3
ENSG00000034510	0.0517987	0.775358	0.99966	6853.49	4657	5310.93	5795.17	TMSB10
ENSG00000034533	-0.226703	0.390803	0.99966	111.177	130.494	141.578	140.874	ASTE1
ENSG00000034693	0.340002	0.0930284	0.99966	325.219	307.592	245.991	254.126	PEX3
ENSG00000034713	0.237233	0.156065	0.99966	698.233	671.111	594.626	567.179	GABARAPL2
ENSG00000035115	-0.0313931	0.917563	0.99966	97.6695	97.8703	115.917	83.7879	SH3YL1
ENSG00000035141	0.0502418	0.793246	0.99966	360.546	365.849	368.987	332.389	FAM136A
ENSG00000035403	0.130266	0.458667	0.99966	4114.59	5416.66	3857.99	4849.57	VCL
ENSG00000035499	0.125269	0.58621	0.99966	353.273	249.336	248.646	304.767	DEPDC1B
ENSG00000035664	0.211522	0.303188	0.99966	295.087	327.399	284.925	252.284	DAPK2
ENSG00000035681	-0.152425	0.413458	0.99966	354.312	371.674	406.151	400.524	NSMAF
ENSG00000035687	0.0243581	0.873319	0.99966	1113.85	1161.63	1094.57	1142.65	ADSS
ENSG00000035862	-0.226014	0.154157	0.99966	8815.19	11359.9	11320	12275.4	TIMP2
ENSG00000035928	0.0162188	0.92259	0.99966	778.239	687.422	710.543	739.359	RFC1
ENSG00000036054	0.0810605	0.652798	0.99966	485.23	539.452	459.243	509.172	TBC1D23
ENSG00000036257	0.0652742	0.70853	0.99966	504.972	513.819	489.328	484.312	CUL3
ENSG00000036448	0.419895	0.253692	0.99966	95.5914	57.091	61.0554	53.4033	MYOM2
ENSG00000036530	-0.0429002	0.938239	0.99966	20.7807	25.6327	27.4307	20.2564	CYP46A1
ENSG00000036549	-0.212511	0.289297	0.99966	300.282	383.325	402.612	388.555	AC118549.1
ENSG00000036672	0.072501	0.873121	0.99966	33.2492	40.7793	38.9339	31.3054	USP2
ENSG00000037042	-0.00899642	0.96348	0.99966	306.516	332.06	328.283	313.974	TUBG2
ENSG00000037241	0.0190848	0.923003	0.99966	465.489	370.509	386.684	439.196	RPL26L1
ENSG00000037280	-0.0652332	0.910886	0.99966	23.8979	17.4768	18.5821	24.8601	FLT4
ENSG00000037474	-0.237643	0.098912	0.99966	2152.89	2340.73	2594.41	2703.31	NSUN2
ENSG00000037637	-0.0789889	0.675578	0.99966	431.2	405.463	479.594	404.207	FBXO42
ENSG00000037749	-0.0618728	0.805055	0.99966	199.495	329.73	251.3	300.163	MFAP3
ENSG00000037757	0.077758	0.655179	0.99966	525.753	574.405	528.262	513.776	MRI1
ENSG00000037897	-0.446589	0.0955268	0.99966	138.192	100.201	167.239	158.368	METTL1
ENSG00000037965	-0.192201	0.75724	0.99966	18.7027	15.1466	21.2367	17.4942	HOXC8
ENSG00000038002	0.1925	0.396443	0.99966	220.276	245.841	184.051	223.741	AGA
ENSG00000038210	0.288746	0.17143	0.99966	336.648	279.629	265.458	239.394	PI4K2B
ENSG00000038219	-0.150008	0.334059	0.99966	1406.86	1567.09	1749.37	1549.62	BOD1L1
ENSG00000038274	0.17472	0.281877	0.99966	835.386	936.759	780.447	789.079	MAT2B
ENSG00000038295	-0.0711415	0.699444	0.99966	561.08	737.523	693.731	669.382	TLL1
ENSG00000038358	-0.0140103	0.934144	0.99966	681.608	791.118	715.852	770.664	EDC4
ENSG00000038382	-0.14258	0.319119	0.99966	5052.84	5648.51	6157.74	5654.3	TRIO
ENSG00000038532	-0.113825	0.522337	0.99966	486.269	443.912	508.795	498.124	CLEC16A
ENSG00000039068	-0.00686142	0.967319	0.99966	10798.7	14077	11359.8	13633.5	CDH1
ENSG00000039123	-0.0586038	0.731518	0.99966	564.197	588.387	576.929	623.345	MTREX
ENSG00000039139	0.154441	0.440328	0.99966	309.633	347.207	306.162	283.59	DNAH5
ENSG00000039319	0.0612584	0.724425	0.99966	568.353	658.294	585.778	589.277	ZFYVE16
ENSG00000039523	-0.129292	0.66108	0.99966	129.88	94.3749	140.693	104.965	RIPOR1
ENSG00000039560	0.253137	0.149069	0.99966	1069.17	982.198	967.153	754.091	RAI14
ENSG00000039650	-0.114934	0.592583	0.99966	226.51	216.713	239.797	240.315	PNKP
ENSG00000040199	-0.130194	0.588292	0.99966	155.856	202.731	191.13	200.723	PHLPP2
ENSG00000040275	-0.0211858	0.907589	0.99966	457.176	411.288	439.776	441.958	SPDL1
ENSG00000040341	0.19271	0.33207	0.99966	328.336	316.913	290.234	274.382	STAU2
ENSG00000040487	-0.275862	0.169873	0.99966	285.735	257.492	322.974	335.152	PQLC2
ENSG00000040531	0.100972	0.621846	0.99966	312.75	368.179	343.326	290.956	CTNS
ENSG00000040633	-0.0567279	0.763059	0.99966	568.353	492.847	610.554	493.52	PHF23
ENSG00000040731	0.644088	0.434726	0.99966	12.4684	12.8163	10.6183	5.52448	CDH10
ENSG00000040933	-0.0839267	0.700574	0.99966	224.432	277.299	249.531	281.748	INPP4A
ENSG00000041353	-0.18619	0.26242	0.99966	761.614	907.631	937.952	960.338	RAB27B
ENSG00000041357	0.0583105	0.71139	0.99966	2697.34	2214.9	2248.43	2470.36	PSMA4
ENSG00000041515	-0.414632	0.530096	0.99966	9.35134	22.1373	15.9275	25.7809	MYO16
ENSG00000041802	-0.250258	0.133016	0.99966	645.242	690.918	753.901	835.117	LSG1
ENSG00000041880	0.305665	0.242598	0.99966	200.534	158.457	166.354	124.301	PARP3
ENSG00000041988	-0.0345061	0.914134	0.99966	83.123	80.3935	94.6801	72.7389	THAP3
ENSG00000042062	0.493888	0.382509	0.99966	32.2102	22.1373	23.0064	15.6527	RIPOR3
ENSG00000042088	0.0653248	0.739516	0.99966	329.375	343.711	303.507	339.755	TDP1
ENSG00000042286	-0.153109	0.453536	0.99966	290.93	276.134	291.119	339.755	AIFM2
ENSG00000042317	0.0203839	0.940588	0.99966	110.138	132.824	116.802	122.459	SPATA7
ENSG00000042429	-0.0482378	0.793492	0.99966	415.615	410.123	448.624	405.128	MED17
ENSG00000042445	0.0283974	0.857314	0.99966	882.143	947.245	891.055	902.331	RETSAT
ENSG00000042493	0.0102433	0.949107	0.99966	2610.06	2119.36	2213.92	2483.25	CAPG
ENSG00000042753	-0.0360999	0.838582	0.99966	782.395	644.313	684.882	778.951	AP2S1
ENSG00000042832	0.621454	0.247083	0.99966	36.3663	32.6234	30.9701	13.8112	TG
ENSG00000042980	0.99375	0.169059	0.99966	13.5075	24.4676	7.96375	11.049	ADAM28
ENSG00000043039	-0.269425	0.581949	0.99966	35.3273	22.1373	32.7398	36.8298	BARX2
ENSG00000043143	-0.0614086	0.701421	0.99966	892.533	823.742	921.14	870.105	JADE2
ENSG00000043355	-0.178885	0.471241	0.99966	165.207	140.98	160.16	186.911	ZIC2
ENSG00000043514	-0.0437162	0.845027	0.99966	234.822	220.208	209.712	259.65	TRIT1
ENSG00000043591	0.167337	0.577368	0.99966	124.684	92.0447	88.4861	104.965	ADRB1
ENSG00000044090	0.00779325	0.960849	0.99966	1136.71	1042.78	1143.24	1024.79	CUL7
ENSG00000044115	-0.0839361	0.555291	0.99966	5542.23	6104.08	5880.78	6462.72	CTNNA1
ENSG00000044446	-0.150121	0.433949	0.99966	331.453	330.895	382.26	352.646	PHKA2
ENSG00000044459	-0.107543	0.795152	0.99966	45.7176	47.77	62.8251	37.7506	CNTLN
ENSG00000044574	-0.0877881	0.636383	0.99966	19051.8	26983.1	21365	27557	HSPA5
ENSG00000046604	0.0437911	0.781302	0.99966	6665.42	8607.93	7431.94	7383.46	DSG2
ENSG00000046647	0.191066	0.362907	0.99966	261.837	267.978	226.524	237.552	GEMIN8
ENSG00000046651	0.0925989	0.530047	0.99966	2563.31	2890.67	2649.27	2464.84	OFD1
ENSG00000046653	0.111075	0.747343	0.99966	65.4594	107.191	91.1406	68.1352	GPM6B
ENSG00000046774	-0.0375174	0.946598	0.99966	21.8198	22.1373	23.0064	22.0979	MAGEC2
ENSG00000047056	-0.171534	0.459041	0.99966	167.285	199.236	208.827	203.485	WDR37
ENSG00000047188	-0.0294761	0.882401	0.99966	345.999	364.683	399.957	325.023	YTHDC2
ENSG00000047230	-0.0265695	0.891386	0.99966	347.038	337.886	370.757	326.865	CTPS2
ENSG00000047249	0.00221496	0.988699	0.99966	959.031	1034.63	1011.4	978.753	ATP6V1H
ENSG00000047315	-0.0742047	0.63159	0.99966	1047.35	1152.31	1145.89	1169.35	POLR2B
ENSG00000047346	0.0594142	0.722963	0.99966	1238.53	1544.95	1410.47	1259.58	FAM214A
ENSG00000047365	0.0272819	0.900172	0.99966	277.423	371.674	345.98	290.035	ARAP2
ENSG00000047410	-0.103512	0.501886	0.99966	1720.65	1925.95	2085.62	1831.36	TPR
ENSG00000047578	-0.00929062	0.960066	0.99966	462.372	547.608	541.535	474.184	KIAA0556
ENSG00000047579	-0.224386	0.282755	0.99966	241.057	228.364	276.961	271.62	DTNBP1
ENSG00000047597	-0.450616	0.419061	0.99966	17.6636	22.1373	23.0064	31.3054	XK
ENSG00000047617	0.330725	0.667498	0.99966	15.5856	10.4861	8.84861	11.9697	ANO2
ENSG00000047621	-0.189411	0.43641	0.99966	158.973	167.778	166.354	206.247	C12orf4
ENSG00000047634	-0.130317	0.54461	0.99966	222.354	257.492	276.077	248.601	SCML1
ENSG00000047644	-0.242943	0.127734	0.99966	741.873	758.495	904.328	871.026	WWC3
ENSG00000047849	-0.0899519	0.526424	0.99966	2225.62	2232.38	2427.17	2317.52	MAP4
ENSG00000047932	-0.128572	0.458622	0.99966	533.026	502.168	583.123	548.765	GOPC
ENSG00000048028	0.294247	0.154773	0.99966	286.774	332.06	257.494	246.76	USP28
ENSG00000048052	-0.00842991	0.960022	0.99966	689.921	800.439	764.52	733.834	HDAC9
ENSG00000048140	-0.0758458	0.657288	0.99966	632.774	583.726	611.439	671.224	TSPAN17
ENSG00000048162	-0.0472803	0.829457	0.99966	311.711	233.025	292.004	271.62	NOP16
ENSG00000048342	0.207352	0.669713	0.99966	36.3663	29.1281	29.2004	27.6224	CC2D2A
ENSG00000048392	0.00708007	0.980642	0.99966	99.7476	99.0354	92.9104	104.965	RRM2B
ENSG00000048405	0.0929844	0.685622	0.99966	219.237	217.878	228.294	181.387	ZNF800
ENSG00000048471	0.0408307	0.827298	0.99966	393.795	414.784	372.526	413.415	SNX29
ENSG00000048544	-0.0333758	0.831823	0.99966	1022.41	1036.96	997.238	1110.42	MRPS10
ENSG00000048649	0.175677	0.284696	0.99966	1393.35	1196.58	1229.07	1064.38	RSF1
ENSG00000048707	0.00512181	0.974528	0.99966	1198.01	1445.92	1309.59	1324.03	VPS13D
ENSG00000048740	-0.373995	0.640451	0.99966	12.4684	6.99074	9.73347	15.6527	CELF2
ENSG00000048828	-0.106974	0.499404	0.99966	2584.09	2913.97	2667.85	3253	FAM120A
ENSG00000048991	-0.174937	0.401204	0.99966	258.72	273.804	275.192	325.944	R3HDM1
ENSG00000049130	-0.0693633	0.653465	0.99966	2675.52	3235.55	3229.74	2971.25	KITLG
ENSG00000049167	-0.181801	0.634362	0.99966	48.8348	51.2654	63.71	49.7203	ERCC8
ENSG00000049192	0.069567	0.845839	0.99966	55.069	99.0354	69.904	76.4219	ADAMTS6
ENSG00000049239	0.00140026	0.992558	0.99966	1349.71	1468.05	1412.24	1402.3	H6PD
ENSG00000049245	0.0542435	0.723354	0.99966	1077.48	1052.11	1029.09	1022.03	VAMP3
ENSG00000049246	-0.432784	0.141903	0.99966	93.5134	144.475	132.729	187.832	PER3
ENSG00000049283	-0.111718	0.511958	0.99966	624.461	581.396	622.057	681.352	EPN3
ENSG00000049323	-0.173089	0.34276	0.99966	574.588	562.754	714.967	567.179	LTBP1
ENSG00000049449	0.24875	0.0861933	0.99966	3093.21	3440.61	2659.01	2839.58	RCN1
ENSG00000049541	-0.119936	0.591805	0.99966	385.483	262.153	376.951	327.786	RFC2
ENSG00000049618	-0.110969	0.458512	0.99966	1208.4	1249.01	1337.91	1315.75	ARID1B
ENSG00000049656	-0.205663	0.161309	0.99966	3119.19	3214.57	3383.71	3920.54	CLPTM1L
ENSG00000049759	-0.0426244	0.790246	0.99966	801.098	765.486	800.799	813.019	NEDD4L
ENSG00000049769	-0.273638	0.232391	0.99966	215.081	175.934	252.185	220.979	PPP1R3F
ENSG00000049860	0.0809328	0.583125	0.99966	1690.51	1703.41	1542.31	1666.55	HEXB
ENSG00000049883	-0.18063	0.551015	0.99966	78.9668	95.5401	103.529	93.9161	PTCD2
ENSG00000050130	0.187877	0.284885	0.99966	536.143	596.543	485.788	508.252	JKAMP
ENSG00000050165	-0.215356	0.439692	0.99966	107.021	109.522	138.923	112.331	DKK3
ENSG00000050327	0.182722	0.37452	0.99966	281.579	279.629	249.531	244.918	ARHGEF5
ENSG00000050344	0.166933	0.3154	0.99966	737.717	742.183	692.846	625.186	NFE2L3
ENSG00000050393	-0.118944	0.565554	0.99966	246.252	251.667	268.113	272.541	MCUR1
ENSG00000050405	0.0739134	0.5987	0.99966	8698.82	9900.05	8876.04	8793.12	LIMA1
ENSG00000050426	0.0606049	0.729692	0.99966	533.026	605.864	532.686	558.893	LETMD1
ENSG00000050438	0.365783	0.245001	0.99966	86.2401	103.696	69.904	77.3427	SLC4A8
ENSG00000050555	-0.0736743	0.854409	0.99966	57.1471	39.6142	46.0128	56.1655	LAMC3
ENSG00000050748	-0.117865	0.487096	0.99966	552.768	551.103	590.202	607.692	MAPK9
ENSG00000050767	-0.122403	0.816486	0.99966	20.7807	29.1281	26.5458	27.6224	COL23A1
ENSG00000050820	-0.015195	0.927247	0.99966	3685.47	2797.46	3433.26	3119.49	BCAR1
ENSG00000051009	-0.167878	0.390259	0.99966	303.399	318.078	363.678	334.231	FAM160A2
ENSG00000051108	0.212973	0.22014	0.99966	816.683	1031.13	782.217	811.177	HERPUD1
ENSG00000051128	-0.163344	0.276457	0.99966	2390.82	2319.76	2432.48	2843.26	HOMER3
ENSG00000051180	-0.00954751	0.969557	0.99966	219.237	156.126	203.518	174.942	RAD51
ENSG00000051341	-0.329653	0.17797	0.99966	202.612	157.292	254.84	197.96	POLQ
ENSG00000051382	0.0573856	0.770418	0.99966	339.765	379.83	322.089	369.219	PIK3CB
ENSG00000051523	0.150744	0.383701	0.99966	7157.93	5183.63	5209.17	5909.35	CYBA
ENSG00000051596	0.113737	0.585657	0.99966	537.182	378.665	399.072	448.403	THOC3
ENSG00000051620	-0.200597	0.19958	0.99966	1156.45	1078.9	1213.14	1356.26	HEBP2
ENSG00000051825	0.102404	0.648127	0.99966	215.081	205.062	201.748	189.674	MPHOSPH9
ENSG00000052126	0.214644	0.212624	0.99966	713.819	849.374	648.603	697.925	PLEKHA5
ENSG00000052344	0.0997287	0.487975	0.99966	3136.85	2842.9	2855.45	2725.41	PRSS8
ENSG00000052723	0.0267952	0.882908	0.99966	432.24	433.426	409.69	440.117	SIKE1
ENSG00000052795	-0.288051	0.209602	0.99966	167.285	177.099	216.791	203.485	FNIP2
ENSG00000052802	-0.14295	0.830065	0.99966	691.999	1266.49	692.846	1469.51	MSMO1
ENSG00000052841	0.102306	0.533097	0.99966	1289.45	1614.86	1356.49	1347.97	TTC17
ENSG00000052850	0.36937	0.425101	0.99966	38.4444	37.2839	30.0853	28.5431	ALX4
ENSG00000053108	-0.0703455	0.855219	0.99966	58.1861	45.4398	60.1705	48.7995	FSTL4
ENSG00000053254	0.148255	0.440432	0.99966	355.351	403.132	343.326	340.676	FOXN3
ENSG00000053371	-0.0493201	0.801224	0.99966	535.104	401.967	470.746	499.965	AKR7A2
ENSG00000053372	-0.284915	0.149803	0.99966	494.582	370.509	498.177	557.051	MRTO4
ENSG00000053438	0.132523	0.775548	0.99966	31.1711	45.4398	28.3155	41.4336	NNAT
ENSG00000053501	-0.187903	0.476078	0.99966	117.411	121.173	133.614	138.112	USE1
ENSG00000053524	-0.460401	0.372832	0.99966	25.9759	19.8071	31.855	31.3054	MCF2L2
ENSG00000053702	-0.484508	0.569559	0.99966	5.19519	11.6512	14.1578	9.20746	NRIP2
ENSG00000053747	-0.223904	0.120084	0.99966	25070.9	28236.7	33098.2	29158.2	LAMA3
ENSG00000053770	-0.25097	0.181938	0.99966	338.726	336.72	409.69	394.079	AP5M1
ENSG00000053900	0.0342441	0.867339	0.99966	304.438	267.978	284.04	275.303	ANAPC4
ENSG00000053918	-0.0199035	0.968437	0.99966	34.2882	29.1281	22.1215	42.3543	KCNQ1
ENSG00000054116	-0.0375104	0.83029	0.99966	780.317	631.497	733.549	716.34	TRAPPC3
ENSG00000054118	-0.103521	0.46864	0.99966	2192.37	2346.56	2456.37	2419.72	THRAP3
ENSG00000054148	-0.160999	0.352393	0.99966	811.488	657.129	806.108	836.958	PHPT1
ENSG00000054179	0.133343	0.654607	0.99966	112.216	106.026	83.1769	116.014	ENTPD2
ENSG00000054267	0.0298216	0.854371	0.99966	917.47	958.896	982.195	855.373	ARID4B
ENSG00000054277	-0.0238207	0.90639	0.99966	335.609	445.077	384.029	408.811	OPN3
ENSG00000054282	-0.0672637	0.752879	0.99966	227.549	238.85	235.373	253.205	SDCCAG8
ENSG00000054392	-0.0232451	0.925587	0.99966	147.543	163.117	169.008	146.399	HHAT
ENSG00000054523	-0.121658	0.476781	0.99966	650.437	781.797	785.756	771.585	KIF1B
ENSG00000054598	-0.0614189	0.696013	0.99966	5238.83	4411.15	5467.55	4602.81	FOXC1
ENSG00000054611	0.273418	0.151413	0.99966	529.909	429.93	406.151	388.555	TBC1D22A
ENSG00000054654	-0.0355863	0.834218	0.99966	1787.14	2191.6	2251.97	1824.92	SYNE2
ENSG00000054690	-0.0609026	0.872588	0.99966	45.7176	61.7515	58.4008	53.4033	PLEKHH1
ENSG00000054793	-0.0103564	0.953872	0.99966	1406.86	1937.6	1583.9	1783.48	ATP9A
ENSG00000054965	-0.0388617	0.824039	0.99966	679.53	572.075	628.251	658.333	FAM168A
ENSG00000054967	-0.00538324	0.980919	0.99966	268.072	205.062	238.027	237.552	RELT
ENSG00000054983	-0.0143673	0.946062	0.99966	722.131	1039.29	741.513	1036.76	GALC
ENSG00000055044	0.00219247	0.988584	0.99966	1106.57	1053.27	1078.65	1078.19	NOP58
ENSG00000055070	-0.136614	0.358922	0.99966	1482.71	1370.18	1572.4	1564.35	SZRD1
ENSG00000055130	-0.0434217	0.802053	0.99966	530.948	526.635	525.607	564.417	CUL1
ENSG00000055147	0.12421	0.589478	0.99966	219.237	198.071	176.972	206.247	FAM114A2
ENSG00000055208	0.0834754	0.577605	0.99966	1302.95	1372.51	1269.77	1254.98	TAB2
ENSG00000055211	0.255322	0.0980259	0.99966	1245.81	1346.88	1047.67	1124.23	GINM1
ENSG00000055332	-0.143726	0.422006	0.99966	1126.32	1036.96	1370.65	1019.27	EIF2AK2
ENSG00000055609	0.0310418	0.885481	0.99966	464.45	743.348	603.475	577.308	KMT2C
ENSG00000055917	-0.0134024	0.932386	0.99966	1032.8	1050.94	1114.04	988.881	PUM2
ENSG00000055950	-0.131177	0.424654	0.99966	1140.86	955.401	1099.88	1196.97	MRPL43
ENSG00000056050	-0.0579879	0.802114	0.99966	261.837	192.245	245.991	227.424	HPF1
ENSG00000056097	-0.00454791	0.975867	0.99966	1390.23	1406.3	1461.79	1343.37	ZFR
ENSG00000056277	0.139139	0.701382	0.99966	58.1861	64.0817	57.5159	53.4033	ZNF280C
ENSG00000056487	0.0675254	0.886197	0.99966	30.1321	40.7793	39.8187	27.6224	PHF21B
ENSG00000056586	-0.117692	0.491549	0.99966	780.317	963.556	908.752	982.436	RC3H2
ENSG00000056736	0.0939236	0.855487	0.99966	28.054	26.7978	26.5458	24.8601	IL17RB
ENSG00000056972	0.0452768	0.790498	0.99966	581.861	583.726	547.729	581.911	TRAF3IP2
ENSG00000056998	0.137874	0.842638	0.99966	13.5075	16.3117	14.1578	12.8904	GYG2
ENSG00000057019	-0.327441	0.0681316	0.99966	528.87	560.424	751.247	615.058	DCBLD2
ENSG00000057252	0.0788978	0.709401	0.99966	567.314	886.658	637.984	737.517	SOAT1
ENSG00000057294	0.019066	0.917107	0.99966	476.918	558.094	480.479	540.478	PKP2
ENSG00000057608	-0.00718604	0.963183	0.99966	1643.76	1646.32	1512.23	1794.53	GDI2
ENSG00000057657	-0.0681769	0.739215	0.99966	617.188	836.558	646.833	876.55	PRDM1
ENSG00000057663	0.1539	0.404654	0.99966	411.459	428.765	385.799	369.219	ATG5
ENSG00000057757	-0.0223277	0.898067	0.99966	617.188	549.938	567.196	618.741	PITHD1
ENSG00000057935	0.0593446	0.744027	0.99966	460.294	496.342	432.697	485.233	MTA3
ENSG00000058056	-0.0662624	0.797375	0.99966	136.114	137.484	131.844	154.685	USP13
ENSG00000058063	0.144709	0.440358	0.99966	690.96	895.979	651.257	783.555	ATP11B
ENSG00000058085	-0.269604	0.0500111	0.99966	51389.7	54094.3	67106.9	60051	LAMC2
ENSG00000058091	0.123121	0.48308	0.99966	714.858	794.614	758.326	627.028	CDK14
ENSG00000058262	-0.194023	0.222553	0.99966	3019.44	3600.23	3461.57	4110.21	SEC61A1
ENSG00000058272	0.128084	0.401118	0.99966	1380.88	1553.11	1335.25	1348.89	PPP1R12A
ENSG00000058335	0.0639484	0.80258	0.99966	196.378	156.126	192.015	145.478	RASGRF1
ENSG00000058404	-0.184065	0.809109	0.99966	16.6246	6.99074	15.0426	11.9697	CAMK2B
ENSG00000058453	-0.107395	0.573989	0.99966	537.182	455.563	591.087	478.788	CROCC
ENSG00000058600	-0.176892	0.338733	0.99966	388.6	417.114	430.927	479.709	POLR3E
ENSG00000058668	-0.0477959	0.756522	0.99966	4562.41	5684.63	5414.46	5176.43	ATP2B4
ENSG00000058673	0.0897038	0.547594	0.99966	2009.5	2287.14	2059.07	1977.76	ZC3H11A
ENSG00000058729	0.0651104	0.783077	0.99966	172.48	180.594	172.548	164.814	RIOK2
ENSG00000058799	0.240243	0.209542	0.99966	414.576	378.665	350.405	321.34	YIPF1
ENSG00000058804	0.0733667	0.691401	0.99966	477.957	443.912	407.921	468.66	NDC1
ENSG00000059122	0.00251359	0.987607	0.99966	758.497	735.192	734.434	756.853	FLYWCH1
ENSG00000059145	-0.056123	0.780923	0.99966	287.813	285.455	312.356	283.59	UNKL
ENSG00000059378	-0.06103	0.764649	0.99966	486.269	389.151	513.219	400.524	PARP12
ENSG00000059573	-0.0951107	0.551339	0.99966	1120.08	1233.86	1170.67	1343.37	ALDH18A1
ENSG00000059588	-0.0943041	0.652317	0.99966	285.735	376.335	372.526	333.31	TARBP1
ENSG00000059691	0.154098	0.485458	0.99966	221.315	249.336	200.863	221.9	GATB
ENSG00000059728	0.0773749	0.579794	0.99966	6016.03	6720.43	6024.13	6046.54	MXD1
ENSG00000059758	0.170785	0.401476	0.99966	413.537	443.912	436.236	325.023	CDK17
ENSG00000059769	-0.0270823	0.892997	0.99966	293.009	279.629	299.083	284.51	DNAJC25
ENSG00000059915	0.0598945	0.874481	0.99966	57.1471	58.2561	65.4797	45.1165	PSD
ENSG00000060069	-0.111257	0.563602	0.99966	347.038	316.913	356.599	360.932	CTDP1
ENSG00000060138	0.0740453	0.619538	0.99966	4681.9	3925.3	4168.58	4008.93	YBX3
ENSG00000060140	0.302427	0.247201	0.99966	140.27	187.585	130.075	135.35	STYK1
ENSG00000060237	-0.281151	0.0703986	0.99966	1684.28	2036.63	2285.59	2234.65	WNK1
ENSG00000060339	0.129222	0.380039	0.99966	1655.19	1692.92	1577.71	1483.32	CCAR1
ENSG00000060491	-0.173995	0.291537	0.99966	1776.75	1398.15	1851.13	1731.92	OGFR
ENSG00000060558	0.0600827	0.743526	0.99966	912.275	687.422	731.78	803.811	GNA15
ENSG00000060642	0.338857	0.0985239	0.99966	325.219	321.574	236.258	275.303	PIGV
ENSG00000060656	-0.0583223	0.683212	0.99966	2097.82	2218.39	2230.73	2263.19	PTPRU
ENSG00000060688	-0.119114	0.502213	0.99966	519.519	469.544	516.759	557.972	SNRNP40
ENSG00000060709	0.164048	0.786702	0.99966	24.9369	16.3117	20.3518	16.5734	RIMBP2
ENSG00000060718	0.581933	0.447048	0.99966	16.6246	11.6512	9.73347	9.20746	COL11A1
ENSG00000060749	-0.0207797	0.911879	0.99966	410.42	485.856	431.812	476.946	QSER1
ENSG00000060762	0.0238234	0.905447	0.99966	467.567	503.333	402.612	552.448	MPC1
ENSG00000060971	0.100723	0.62391	0.99966	360.546	438.086	329.168	415.256	ACAA1
ENSG00000060982	0.0697794	0.676113	0.99966	1427.64	1754.67	1401.62	1629.72	BCAT1
ENSG00000061273	-0.0588179	0.690058	0.99966	1502.45	1456.4	1508.69	1573.55	HDAC7
ENSG00000061656	-0.561274	0.313111	0.99966	18.7027	18.642	25.661	29.4639	SPAG4
ENSG00000061676	-0.0315448	0.841754	0.99966	1807.92	2151.98	1906.87	2139.81	NCKAP1
ENSG00000061794	-0.0243329	0.901771	0.99966	321.063	335.555	312.356	355.408	MRPS35
ENSG00000061936	-0.0993151	0.540069	0.99966	796.942	828.402	915.831	824.988	SFSWAP
ENSG00000061938	-0.0545631	0.713868	0.99966	1501.41	1586.9	1659.11	1547.77	TNK2
ENSG00000061987	-0.0979031	0.585511	0.99966	563.158	710.725	691.076	671.224	MON2
ENSG00000062038	0.174679	0.225161	0.99966	12699.1	13387.3	10649.3	12462.3	CDH3
ENSG00000062194	-0.0297727	0.849923	0.99966	1177.23	1216.39	1306.94	1136.2	GPBP1
ENSG00000062282	-0.348159	0.129123	0.99966	250.408	189.915	253.955	307.529	DGAT2
ENSG00000062370	-0.261884	0.544991	0.99966	32.2102	43.1095	50.4371	39.5921	ZNF112
ENSG00000062485	-0.0683115	0.640832	0.99966	1759.09	1861.87	1837.86	1958.43	CS
ENSG00000062524	-0.0735593	0.852881	0.99966	46.7567	46.6049	53.0916	45.1165	LTK
ENSG00000062582	-0.0244288	0.882554	0.99966	1114.89	930.933	1000.78	1080.96	MRPS24
ENSG00000062598	-0.210238	0.273409	0.99966	340.804	414.784	443.315	429.988	ELMO2
ENSG00000062650	-0.164786	0.290035	0.99966	926.821	997.345	1061.83	1094.77	WAPL
ENSG00000062716	0.295595	0.0862649	0.99966	4530.2	6334.77	4318.12	4532.83	VMP1
ENSG00000062725	0.15566	0.404623	0.99966	419.771	453.233	414.115	369.219	APPBP2
ENSG00000062822	-0.227313	0.216856	0.99966	648.359	527.801	745.053	632.552	POLD1
ENSG00000063046	-0.0331317	0.825256	0.99966	3887.04	4164.15	3764.2	4473.9	EIF4B
ENSG00000063169	-0.229492	0.285187	0.99966	229.627	207.392	253.07	259.65	BICRA
ENSG00000063176	-0.366724	0.256432	0.99966	89.3572	60.5864	99.9892	93.9161	SPHK2
ENSG00000063177	0.101727	0.519943	0.99966	5175.44	4288.82	4056.2	4764.86	RPL18
ENSG00000063180	0.240576	0.327682	0.99966	168.324	166.613	137.153	146.399	CA11
ENSG00000063241	0.098203	0.635863	0.99966	267.033	277.299	244.222	264.254	ISOC2
ENSG00000063245	-0.180142	0.226082	0.99966	1766.36	1653.31	1847.59	2027.48	EPN1
ENSG00000063322	-0.13477	0.459621	0.99966	392.756	420.609	440.661	452.086	MED29
ENSG00000063438	-0.0622172	0.759509	0.99966	287.813	356.528	344.211	327.786	AHRR
ENSG00000063587	-0.291737	0.348408	0.99966	78.9668	87.3842	116.802	86.5501	ZNF275
ENSG00000063601	0.00721479	0.964357	0.99966	778.239	789.953	806.108	754.091	MTMR1
ENSG00000063660	-0.241397	0.0838221	0.99966	4280.83	4009.19	4741.08	5059.5	GPC1
ENSG00000063761	-0.341014	0.204551	0.99966	101.826	131.659	145.117	150.082	ADCK1
ENSG00000063854	0.00707095	0.970906	0.99966	503.933	391.481	438.006	453.928	HAGH
ENSG00000063978	-0.168664	0.334024	0.99966	533.026	481.196	576.044	564.417	RNF4
ENSG00000064012	-0.0695998	0.647176	0.99966	1082.68	1084.73	1152.09	1122.39	CASP8
ENSG00000064102	0.105554	0.569238	0.99966	414.576	404.298	368.102	393.159	INTS13
ENSG00000064115	0.221704	0.272426	0.99966	472.762	584.892	392.878	513.776	TM7SF3
ENSG00000064195	-0.195593	0.376013	0.99966	232.744	195.741	237.143	254.126	DLX3
ENSG00000064199	0.123178	0.682089	0.99966	135.075	107.191	88.4861	134.429	SPA17
ENSG00000064205	0.0882831	0.844874	0.99966	45.7176	37.2839	49.5522	28.5431	WISP2
ENSG00000064225	0.615295	0.253915	0.99966	29.093	30.2932	21.2367	17.4942	ST3GAL6
ENSG00000064270	0.310271	0.149949	0.99966	249.369	256.327	207.942	199.802	ATP2C2
ENSG00000064300	0.32812	0.0652599	0.99966	923.704	734.027	633.56	687.797	NGFR
ENSG00000064309	-0.0576308	0.869673	0.99966	55.069	78.0632	65.4797	72.7389	CDON
ENSG00000064313	-0.0683149	0.686267	0.99966	606.798	671.111	690.191	649.126	TAF2
ENSG00000064393	-0.156822	0.454713	0.99966	230.666	260.987	276.077	271.62	HIPK2
ENSG00000064419	0.0993618	0.563713	0.99966	624.461	609.359	542.42	609.534	TNPO3
ENSG00000064489	-0.151142	0.725503	0.99966	39.4834	36.1188	38.9339	45.1165	BORCS8-MEF2B
ENSG00000064490	-0.057264	0.762067	0.99966	608.876	463.719	563.656	553.368	RFXANK
ENSG00000064545	-0.0893289	0.572444	0.99966	1022.41	923.942	1007.86	1063.46	TMEM161A
ENSG00000064547	0.0183955	0.936643	0.99966	192.222	217.878	220.33	184.149	LPAR2
ENSG00000064601	-0.0824443	0.548715	0.99966	5779.13	6066.79	6478.06	6064.03	CTSA
ENSG00000064607	-0.0446942	0.773224	0.99966	1020.33	1005.5	1080.41	1009.14	SUGP2
ENSG00000064651	-0.0213189	0.898184	0.99966	2211.07	2872.03	2437.79	2719.88	SLC12A2
ENSG00000064652	0.117716	0.642186	0.99966	142.348	159.622	134.499	143.636	SNX24
ENSG00000064655	0.0979009	0.604291	0.99966	537.182	440.416	432.697	481.55	EYA2
ENSG00000064666	-0.00904215	0.951546	0.99966	1629.21	1536.8	1648.5	1537.65	CNN2
ENSG00000064687	0.101559	0.528669	0.99966	778.239	822.577	745.937	745.804	ABCA7
ENSG00000064692	0.365246	0.362675	0.99966	48.8348	55.9259	39.8187	41.4336	SNCAIP
ENSG00000064703	-0.0909935	0.674834	0.99966	222.354	217.878	244.222	224.662	DDX20
ENSG00000064726	-0.0403023	0.830623	0.99966	370.936	353.032	368.102	376.585	BTBD1
ENSG00000064763	0.0198183	0.961987	0.99966	39.4834	54.7608	53.9765	38.6713	FAR2
ENSG00000064787	-0.222136	0.149223	0.99966	1010.98	986.859	1129.08	1201.57	BCAS1
ENSG00000064932	-0.0408343	0.781068	0.99966	1726.88	1627.68	1766.18	1684.97	SBNO2
ENSG00000064933	-0.075973	0.790415	0.99966	146.504	108.356	155.735	113.252	PMS1
ENSG00000064961	-0.00915613	0.953119	0.99966	1374.65	1195.42	1297.21	1289.97	HMG20B
ENSG00000064995	0.0845553	0.63416	0.99966	535.104	496.342	507.025	465.897	TAF11
ENSG00000064999	-0.219365	0.169904	0.99966	797.981	755	883.976	924.429	ANKS1A
ENSG00000065000	-0.126113	0.402062	0.99966	1450.5	1415.62	1486.57	1641.69	AP3D1
ENSG00000065029	0.120721	0.481982	0.99966	619.266	638.487	611.439	545.082	ZNF76
ENSG00000065054	0.0726153	0.681266	0.99966	543.417	492.847	484.019	501.807	SLC9A3R2
ENSG00000065057	-0.218111	0.389984	0.99966	134.036	128.163	150.426	154.685	NTHL1
ENSG00000065060	-0.394564	0.0602655	0.99966	237.94	299.437	331.823	373.823	UHRF1BP1
ENSG00000065135	0.0724355	0.647	0.99966	1126.32	1053.27	980.426	1092.93	GNAI3
ENSG00000065150	-0.16062	0.288121	0.99966	1080.6	1092.89	1214.91	1214.46	IPO5
ENSG00000065154	0.189006	0.284235	0.99966	1389.19	1528.64	1092.8	1466.75	OAT
ENSG00000065183	-0.27528	0.196085	0.99966	224.432	214.383	275.192	255.967	WDR3
ENSG00000065243	0.136825	0.375218	0.99966	2012.62	2416.46	1995.36	2032.09	PKN2
ENSG00000065268	-0.306202	0.189306	0.99966	204.69	159.622	227.409	223.741	WDR18
ENSG00000065308	0.0441395	0.766569	0.99966	1519.07	1632.34	1494.53	1561.59	TRAM2
ENSG00000065320	-0.339757	0.240805	0.99966	88.3182	95.5401	125.65	106.807	NTN1
ENSG00000065328	-0.179907	0.530144	0.99966	110.138	108.356	143.347	104.044	MCM10
ENSG00000065357	0.0344291	0.81819	0.99966	1938.84	1817.59	1935.19	1732.84	DGKA
ENSG00000065361	0.00651896	0.966736	0.99966	1849.49	2228.88	1964.39	2094.7	ERBB3
ENSG00000065427	0.0231068	0.877095	0.99966	1844.29	1875.85	1719.28	1941.85	KARS
ENSG00000065457	-0.0842279	0.648931	0.99966	396.912	394.977	438.891	400.524	ADAT1
ENSG00000065485	0.0881254	0.721031	0.99966	169.363	161.952	142.463	169.417	PDIA5
ENSG00000065491	-0.159097	0.449666	0.99966	301.321	251.667	286.695	331.469	TBC1D22B
ENSG00000065518	-0.0744001	0.711753	0.99966	1138.78	814.421	883.091	1174.87	NDUFB4
ENSG00000065526	-0.190021	0.228683	0.99966	1203.21	1414.46	1446.75	1538.57	SPEN
ENSG00000065534	0.11974	0.544293	0.99966	327.297	389.151	327.398	331.469	MYLK
ENSG00000065548	-0.00434356	0.978296	0.99966	916.431	838.888	869.818	891.282	ZC3H15
ENSG00000065559	0.312473	0.0908898	0.99966	436.396	438.086	344.211	360.012	MAP2K4
ENSG00000065600	0.148942	0.590087	0.99966	112.216	128.163	107.953	108.648	TMEM206
ENSG00000065613	0.0177347	0.900242	0.99966	2591.36	2766	2634.23	2657.27	SLK
ENSG00000065615	-0.0826318	0.738804	0.99966	150.66	154.961	174.318	149.161	CYB5R4
ENSG00000065618	0.0304443	0.846402	0.99966	36592.8	32841.3	38067.6	29916.9	COL17A1
ENSG00000065621	0.349578	0.531587	0.99966	25.9759	25.6327	23.8912	16.5734	GSTO2
ENSG00000065665	0.0957406	0.761255	0.99966	96.6305	83.8888	73.4434	95.7576	SEC61A2
ENSG00000065675	0.45119	0.307316	0.99966	47.7957	39.6142	33.6247	30.3846	PRKCQ
ENSG00000065717	0.216289	0.434349	0.99966	226.51	140.98	177.857	139.033	TLE2
ENSG00000065802	-0.0145204	0.948606	0.99966	203.651	205.062	193.784	219.138	ASB1
ENSG00000065809	0.17322	0.279885	0.99966	838.503	871.512	776.023	740.28	FAM107B
ENSG00000065833	0.366022	0.193965	0.99966	132.997	135.154	88.4861	119.697	ME1
ENSG00000065882	0.177114	0.341636	0.99966	483.152	502.168	395.533	476.026	TBC1D1
ENSG00000065883	-0.110804	0.494905	0.99966	1162.68	1251.34	1421.09	1185	CDK13
ENSG00000065911	-0.103562	0.512696	0.99966	820.839	807.43	883.091	866.422	MTHFD2
ENSG00000065923	0.195308	0.385056	0.99966	431.2	626.836	386.684	536.795	SLC9A7
ENSG00000065970	-0.211442	0.210923	0.99966	565.236	544.112	629.136	655.571	FOXJ2
ENSG00000065978	-0.126655	0.484364	0.99966	6976.1	4820.11	5992.28	6888.1	YBX1
ENSG00000065989	-0.134992	0.747344	0.99966	58.1861	32.6234	50.4371	49.7203	PDE4A
ENSG00000066027	0.0824496	0.675283	0.99966	421.849	421.774	349.52	447.483	PPP2R5A
ENSG00000066044	-0.17252	0.320112	0.99966	582.9	556.929	599.051	685.956	ELAVL1
ENSG00000066084	-0.0906753	0.550595	0.99966	1825.59	2126.35	2051.99	2155.47	DIP2B
ENSG00000066117	-0.0979064	0.552465	0.99966	660.828	700.239	708.773	747.646	SMARCD1
ENSG00000066135	-0.131634	0.454251	0.99966	483.152	528.966	574.275	534.033	KDM4A
ENSG00000066136	0.12612	0.489458	0.99966	472.762	429.93	415.884	411.573	NFYC
ENSG00000066230	0.0547445	0.818634	0.99966	226.51	320.409	298.198	227.424	SLC9A3
ENSG00000066248	0.312697	0.392826	0.99966	70.6545	65.2469	45.1279	64.4522	NGEF
ENSG00000066279	0.222805	0.140543	0.99966	1674.93	1642.82	1339.68	1503.58	ASPM
ENSG00000066322	0.0482988	0.765038	0.99966	1710.26	1903.81	1574.17	1920.68	ELOVL1
ENSG00000066379	0.216733	0.30203	0.99966	335.609	301.767	245.991	302.925	ZNRD1
ENSG00000066382	-0.553278	0.079781	0.99966	61.3032	78.0632	98.2195	105.886	MPPED2
ENSG00000066422	-0.0283285	0.892404	0.99966	263.915	327.399	287.58	314.895	ZBTB11
ENSG00000066427	0.14485	0.461879	0.99966	327.297	360.023	322.974	298.322	ATXN3
ENSG00000066455	0.101391	0.572443	0.99966	609.915	741.018	590.202	668.462	GOLGA5
ENSG00000066468	0.0815962	0.71105	0.99966	283.657	283.125	307.047	228.345	FGFR2
ENSG00000066557	0.16877	0.446357	0.99966	227.549	215.548	199.094	195.198	LRRC40
ENSG00000066583	0.05792	0.844461	0.99966	105.982	110.687	87.6012	120.618	ISOC1
ENSG00000066629	-0.208761	0.344858	0.99966	211.964	189.915	231.833	232.949	EML1
ENSG00000066654	0.0277844	0.873607	0.99966	586.017	638.487	560.117	640.839	THUMPD1
ENSG00000066697	-0.192297	0.315776	0.99966	377.171	364.683	387.569	460.373	MSANTD3
ENSG00000066739	-0.154363	0.458857	0.99966	338.726	485.856	443.315	473.263	ATG2B
ENSG00000066777	0.107041	0.492283	0.99966	1137.75	1281.63	1109.62	1136.2	ARFGEF1
ENSG00000066827	-0.0894806	0.665088	0.99966	261.837	320.409	315.895	302.925	ZFAT
ENSG00000066855	0.0537092	0.774478	0.99966	389.639	405.463	364.563	401.445	MTFR1
ENSG00000066923	-0.168442	0.518791	0.99966	117.411	145.64	145.117	150.082	STAG3
ENSG00000066926	-0.0917857	0.715722	0.99966	146.504	189.915	161.045	197.04	FECH
ENSG00000066933	-0.0728414	0.729783	0.99966	276.384	374.004	341.556	341.597	MYO9A
ENSG00000067057	-0.0531592	0.742765	0.99966	1546.09	1252.51	1459.14	1445.57	PFKP
ENSG00000067064	-0.187881	0.454431	0.99966	264.955	425.27	318.55	466.818	IDI1
ENSG00000067066	0.112746	0.564294	0.99966	669.14	595.378	676.918	492.599	SP100
ENSG00000067082	-0.158399	0.248669	0.99966	4686.06	4436.79	5169.36	5012.54	KLF6
ENSG00000067113	0.202221	0.25872	0.99966	491.465	551.103	460.128	445.641	PLPP1
ENSG00000067141	-0.282041	0.117867	0.99966	420.81	469.544	565.426	516.538	NEO1
ENSG00000067167	0.204893	0.145405	0.99966	3219.98	3425.46	2942.16	2823.01	TRAM1
ENSG00000067177	-0.299186	0.220967	0.99966	151.699	173.603	222.985	176.783	PHKA1
ENSG00000067182	-0.13783	0.315403	0.99966	4327.59	4284.16	4867.62	4607.41	TNFRSF1A
ENSG00000067191	-0.115991	0.798073	0.99966	42.6005	30.2932	46.0128	33.1469	CACNB1
ENSG00000067208	-0.0411632	0.849747	0.99966	226.51	242.346	258.379	223.741	EVI5
ENSG00000067221	-0.0955376	0.63756	0.99966	286.774	269.143	285.81	308.45	STOML1
ENSG00000067225	0.062403	0.686578	0.99966	23899.9	19973.7	19246.6	22771	PKM
ENSG00000067248	-0.186465	0.302807	0.99966	404.186	398.472	451.279	462.214	DHX29
ENSG00000067334	-0.075167	0.64381	0.99966	764.731	718.881	799.914	763.298	DNTTIP2
ENSG00000067365	0.0782628	0.758772	0.99966	139.231	170.108	138.923	153.765	METTL22
ENSG00000067369	-0.235045	0.189996	0.99966	445.747	524.305	563.656	577.308	TP53BP1
ENSG00000067445	0.510444	0.215534	0.99966	52.9909	51.2654	32.7398	40.5128	TRO
ENSG00000067533	-0.234597	0.366773	0.99966	120.528	123.503	140.693	146.399	RRP15
ENSG00000067560	-0.0119183	0.937236	0.99966	3694.82	3435.95	3279.29	3911.33	RHOA
ENSG00000067596	-0.258537	0.128665	0.99966	520.558	511.489	613.208	621.503	DHX8
ENSG00000067601	0.540526	0.309582	0.99966	23.8979	40.7793	19.4669	24.8601	PMS2P4
ENSG00000067606	0.0947287	0.595863	0.99966	460.294	470.71	436.236	435.513	PRKCZ
ENSG00000067704	0.0738297	0.645858	0.99966	1524.27	1758.17	1438.78	1679.44	IARS2
ENSG00000067715	0.130775	0.744417	0.99966	42.6005	65.2469	54.8614	43.2751	SYT1
ENSG00000067798	-0.114381	0.767426	0.99966	45.7176	64.0817	48.6673	69.9767	NAV3
ENSG00000067829	0.0611319	0.714666	0.99966	703.428	708.395	638.869	714.499	IDH3G
ENSG00000067836	-0.0290471	0.867645	0.99966	831.23	675.771	797.259	741.2	ROGDI
ENSG00000067840	-0.537979	0.408608	0.99966	15.5856	11.6512	21.2367	18.4149	PDZD4
ENSG00000067900	-0.0116568	0.945611	0.99966	588.095	587.222	619.402	565.338	ROCK1
ENSG00000067955	-0.0906017	0.597326	0.99966	668.101	577.901	665.415	662.016	CBFB
ENSG00000067992	-0.482894	0.211385	0.99966	42.6005	45.4398	53.9765	69.0559	PDK3
ENSG00000068001	-0.0520028	0.763642	0.99966	555.885	595.378	566.311	627.028	HYAL2
ENSG00000068024	0.18523	0.506056	0.99966	111.177	128.163	104.414	105.886	HDAC4
ENSG00000068028	0.204418	0.467222	0.99966	115.333	124.668	113.262	94.8368	RASSF1
ENSG00000068078	0.130622	0.391739	0.99966	1921.18	1903.81	1613.1	1881.08	FGFR3
ENSG00000068079	-0.321327	0.100078	0.99966	428.083	365.849	547.729	444.72	IFI35
ENSG00000068097	0.101627	0.630541	0.99966	247.291	281.96	241.567	251.364	HEATR6
ENSG00000068120	-0.194298	0.221952	0.99966	1231.26	1210.56	1277.74	1516.47	COASY
ENSG00000068137	-0.0948159	0.620998	0.99966	480.035	383.325	445.97	476.946	PLEKHH3
ENSG00000068305	0.0250508	0.891846	0.99966	482.113	594.213	546.844	510.093	MEF2A
ENSG00000068308	-0.16537	0.283752	0.99966	1125.28	1035.79	1185.71	1238.4	OTUD5
ENSG00000068323	-0.139624	0.381386	0.99966	863.44	822.577	893.709	964.021	TFE3
ENSG00000068354	-0.250082	0.242701	0.99966	278.462	220.208	296.428	297.401	TBC1D25
ENSG00000068366	-0.12958	0.44513	0.99966	544.456	580.231	614.093	615.979	ACSL4
ENSG00000068383	0.0153966	0.933795	0.99966	423.927	397.307	390.224	422.622	INPP5A
ENSG00000068394	-0.0966582	0.624871	0.99966	356.39	308.758	338.017	373.823	GPKOW
ENSG00000068400	0.102627	0.518167	0.99966	899.806	887.823	859.2	805.653	GRIPAP1
ENSG00000068438	-0.118706	0.484489	0.99966	592.251	558.094	641.524	607.692	FTSJ1
ENSG00000068489	0.273176	0.139878	0.99966	1050.47	926.273	696.385	940.082	PRR11
ENSG00000068615	-0.604521	0.445507	0.99966	12.4684	5.82561	12.388	15.6527	REEP1
ENSG00000068650	-0.203175	0.308876	0.99966	989.164	1561.26	1452.06	1482.4	ATP11A
ENSG00000068697	0.165553	0.234534	0.99966	7226.5	7744.57	6386.92	6960.84	LAPTM4A
ENSG00000068724	-0.155474	0.304785	0.99966	1093.07	1068.42	1207.83	1199.73	TTC7A
ENSG00000068745	0.112948	0.516655	0.99966	744.99	696.743	727.355	605.851	IP6K2
ENSG00000068784	0.183059	0.444004	0.99966	196.378	175.934	174.318	153.765	SRBD1
ENSG00000068796	0.044449	0.802866	0.99966	462.372	469.544	445.085	458.531	KIF2A
ENSG00000068878	-0.0171041	0.917324	0.99966	1032.8	1211.73	1063.6	1207.1	PSME4
ENSG00000068885	0.107026	0.67416	0.99966	156.895	164.282	167.239	130.746	IFT80
ENSG00000068903	0.06364	0.743909	0.99966	326.258	360.023	320.32	336.072	SIRT2
ENSG00000068912	0.00118823	0.994204	0.99966	687.843	710.725	691.076	706.212	ERLEC1
ENSG00000068971	0.129138	0.504374	0.99966	409.381	405.463	407.921	336.993	PPP2R5B
ENSG00000069011	-0.155006	0.414205	0.99966	1054.62	731.697	1006.09	984.277	PITX1
ENSG00000069020	0.195541	0.243804	0.99966	666.023	727.037	618.518	597.564	MAST4
ENSG00000069122	0.0159813	0.979259	0.99966	13.5075	26.7978	22.1215	17.4942	ADGRF5
ENSG00000069188	-0.32123	0.639089	0.99966	12.4684	15.1466	12.388	22.0979	SDK2
ENSG00000069248	0.0539098	0.765665	0.99966	518.48	604.699	507.91	573.625	NUP133
ENSG00000069275	0.131422	0.382426	0.99966	5233.63	4324.94	4439.35	4287.91	NUCKS1
ENSG00000069329	0.117078	0.421016	0.99966	2256.79	2059.94	1988.28	1992.49	VPS35
ENSG00000069345	0.146876	0.326245	0.99966	1305.03	1324.74	1190.14	1185	DNAJA2
ENSG00000069399	0.171803	0.360444	0.99966	848.893	624.506	667.185	641.76	BCL3
ENSG00000069424	-0.197557	0.509985	0.99966	112.216	79.2283	113.262	106.807	KCNAB2
ENSG00000069431	0.118126	0.850025	0.99966	22.8588	15.1466	19.4669	15.6527	ABCC9
ENSG00000069482	0.0987745	0.687305	0.99966	342.882	215.548	238.912	283.59	GAL
ENSG00000069493	0.452434	0.0950529	0.99966	141.309	177.099	130.075	102.203	CLEC2D
ENSG00000069509	0.332986	0.117145	0.99966	364.702	293.611	243.337	279.907	FUNDC1
ENSG00000069667	0.446073	0.225958	0.99966	68.5765	67.5771	57.5159	42.3543	RORA
ENSG00000069696	-0.906087	0.109788	0.99966	19.7417	12.8163	32.7398	28.5431	DRD4
ENSG00000069702	0.242788	0.186066	0.99966	442.63	494.012	402.612	388.555	TGFBR3
ENSG00000069764	0.415145	0.587756	0.99966	12.4684	16.3117	15.0426	6.44522	PLA2G10
ENSG00000069812	-0.356808	0.0527618	0.99966	523.675	575.571	621.172	786.317	HES2
ENSG00000069869	0.292592	0.13106	0.99966	478.996	638.487	453.933	457.611	NEDD4
ENSG00000069943	-0.0521275	0.873564	0.99966	70.6545	83.8888	70.7888	89.3124	PIGB
ENSG00000069956	-0.0354915	0.82384	0.99966	824.996	893.649	870.703	890.361	MAPK6
ENSG00000069966	0.171476	0.577517	0.99966	111.177	87.3842	97.3347	79.1841	GNB5
ENSG00000069974	0.0498275	0.816716	0.99966	245.213	227.199	230.064	226.503	RAB27A
ENSG00000069998	-0.288754	0.15446	0.99966	348.078	280.795	406.151	362.774	HDHD5
ENSG00000070010	-0.175729	0.307053	0.99966	1032.8	850.54	983.965	1144.49	UFD1
ENSG00000070018	-0.0246564	0.909702	0.99966	270.15	372.839	306.162	347.121	LRP6
ENSG00000070047	-0.288058	0.0705931	0.99966	1063.97	954.235	1296.32	1168.43	PHRF1
ENSG00000070061	-0.152599	0.320488	0.99966	989.164	965.887	1080.41	1092.93	ELP1
ENSG00000070081	0.260615	0.125739	0.99966	748.107	827.237	614.093	700.688	NUCB2
ENSG00000070087	0.123772	0.570557	0.99966	240.018	235.355	231.833	204.406	PFN2
ENSG00000070159	-0.131491	0.457189	0.99966	493.543	546.443	598.166	540.478	PTPN3
ENSG00000070182	-0.0271957	0.948721	0.99966	38.4444	43.1095	41.5884	41.4336	SPTB
ENSG00000070190	0.26548	0.0840322	0.99966	1508.68	1683.6	1273.31	1382.04	DAPP1
ENSG00000070214	-0.06947	0.674104	0.99966	2904.11	3754.03	3274.87	3710.61	SLC44A1
ENSG00000070269	0.133161	0.537058	0.99966	275.345	368.179	308.816	277.145	TMEM260
ENSG00000070366	0.0635389	0.757532	0.99966	283.657	349.537	309.701	295.559	SMG6
ENSG00000070367	0.00774709	0.964315	0.99966	546.534	605.864	556.577	589.277	EXOC5
ENSG00000070371	-0.428356	0.0943441	0.99966	122.606	115.347	160.16	160.21	CLTCL1
ENSG00000070404	-0.21285	0.20127	0.99966	1523.23	1203.57	1644.07	1517.39	FSTL3
ENSG00000070423	-0.289588	0.181362	0.99966	439.513	291.281	439.776	454.848	RNF126
ENSG00000070444	-0.0543553	0.749109	0.99966	590.173	573.24	583.123	625.186	MNT
ENSG00000070476	-0.0823799	0.67218	0.99966	355.351	323.904	378.72	340.676	ZXDC
ENSG00000070495	-0.156914	0.466254	0.99966	375.092	284.29	328.283	407.89	JMJD6
ENSG00000070501	0.16013	0.29283	0.99966	1243.73	1313.09	1113.15	1174.87	POLB
ENSG00000070526	-0.343688	0.262155	0.99966	104.943	118.843	103.529	180.466	ST6GALNAC1
ENSG00000070540	-0.0425963	0.845208	0.99966	236.901	293.611	251.3	294.639	WIPI1
ENSG00000070610	-0.0775743	0.708491	0.99966	269.111	256.327	261.919	292.797	GBA2
ENSG00000070614	-0.0924145	0.563422	0.99966	2083.27	2635.51	2482.92	2546.78	NDST1
ENSG00000070669	-0.289301	0.067691	0.99966	962.149	1112.69	1252.08	1282.6	ASNS
ENSG00000070718	-0.0928515	0.621839	0.99966	357.429	384.49	409.69	381.189	AP3M2
ENSG00000070729	0.308764	0.22027	0.99966	163.129	219.043	144.232	163.893	CNGB1
ENSG00000070731	0.10619	0.563629	0.99966	594.329	503.333	544.189	476.026	ST6GALNAC2
ENSG00000070756	0.234064	0.0962478	0.99966	19020.6	20876.7	16036.3	17885.5	PABPC1
ENSG00000070759	0.224647	0.348654	0.99966	190.144	174.768	149.541	162.972	TESK2
ENSG00000070761	0.0348906	0.85362	0.99966	575.627	448.572	506.14	494.441	CFAP20
ENSG00000070770	-0.0025573	0.986786	0.99966	1192.81	1168.62	1122.89	1243.01	CSNK2A2
ENSG00000070778	-0.262025	0.264088	0.99966	183.91	216.713	270.767	209.009	PTPN21
ENSG00000070785	-0.294223	0.221152	0.99966	229.627	163.117	223.87	258.73	EIF2B3
ENSG00000070808	-0.087919	0.781281	0.99966	81.0449	146.805	107.953	133.508	CAMK2A
ENSG00000070814	-0.340369	0.0514949	0.99966	1399.58	1049.78	1621.95	1480.56	TCOF1
ENSG00000070831	0.100556	0.466282	0.99966	3383.11	3374.2	3135.95	3166.45	CDC42
ENSG00000070882	-0.100591	0.555994	0.99966	784.473	912.291	978.656	839.72	OSBPL3
ENSG00000070950	0.158307	0.548031	0.99966	135.075	138.65	130.075	115.093	RAD18
ENSG00000070961	-0.0457565	0.798382	0.99966	520.558	572.075	606.129	521.142	ATP2B1
ENSG00000071051	-0.10992	0.473318	0.99966	1123.2	1125.51	1163.59	1263.26	NCK2
ENSG00000071054	-0.0860574	0.580854	0.99966	921.626	894.814	971.577	956.655	MAP4K4
ENSG00000071073	0.13602	0.637818	0.99966	107.021	160.787	109.723	133.508	MGAT4A
ENSG00000071082	0.0277766	0.882503	0.99966	5150.51	3380.02	4021.69	4347.76	RPL31
ENSG00000071127	-0.048186	0.740454	0.99966	4148.88	3807.62	3866.84	4360.65	WDR1
ENSG00000071189	0.0488858	0.776881	0.99966	649.398	779.467	697.27	683.193	SNX13
ENSG00000071205	0.0534506	0.776301	0.99966	403.146	368.179	372.526	371.061	ARHGAP10
ENSG00000071242	0.0487	0.745606	0.99966	1291.52	1341.06	1245.88	1299.17	RPS6KA2
ENSG00000071243	0.171696	0.549279	0.99966	114.294	113.017	111.492	90.2331	ING3
ENSG00000071246	-0.252682	0.442945	0.99966	60.2642	90.8796	92.0255	87.4709	VASH1
ENSG00000071282	-0.141934	0.765236	0.99966	40.5225	25.6327	30.9701	42.3543	LMCD1
ENSG00000071462	-0.193266	0.243272	0.99966	696.155	647.808	739.743	797.366	BUD23
ENSG00000071537	-0.0203902	0.912377	0.99966	1692.59	2487.54	2042.26	2195.98	SEL1L
ENSG00000071539	-0.0407225	0.823142	0.99966	724.209	570.91	635.33	697.925	TRIP13
ENSG00000071553	-0.133008	0.36387	0.99966	2756.57	2967.57	2952.78	3323.89	ATP6AP1
ENSG00000071564	0.0196839	0.909164	0.99966	761.614	636.157	696.385	683.193	TCF3
ENSG00000071575	-0.0393894	0.847873	0.99966	351.195	484.691	409.69	448.403	TRIB2
ENSG00000071626	-0.245992	0.12975	0.99966	1632.33	1310.76	1699.82	1791.77	DAZAP1
ENSG00000071655	-0.222487	0.136463	0.99966	1352.83	1268.82	1555.58	1503.58	MBD3
ENSG00000071794	0.0513168	0.792206	0.99966	329.375	353.032	315.895	342.517	HLTF
ENSG00000071859	-0.119506	0.526676	0.99966	1008.91	735.192	1022.01	873.788	FAM50A
ENSG00000071889	-0.101571	0.547674	0.99966	635.891	580.231	643.294	662.016	FAM3A
ENSG00000071894	-0.165989	0.267049	0.99966	3277.12	3045.63	3824.37	3269.57	CPSF1
ENSG00000071909	0.734893	0.350196	0.99966	15.5856	12.8163	10.6183	6.44522	MYO3B
ENSG00000071967	0.395506	0.0808074	0.99966	421.849	383.325	370.757	241.235	CYBRD1
ENSG00000071994	-0.0553383	0.731577	0.99966	950.719	844.714	908.752	957.576	PDCD2
ENSG00000072041	-0.637027	0.0513136	0.99966	55.069	83.8888	117.686	97.5991	SLC6A15
ENSG00000072042	0.297611	0.155168	0.99966	1273.86	1902.65	1087.49	1496.21	RDH11
ENSG00000072062	-0.059351	0.690715	0.99966	1566.87	1516.99	1536.12	1677.6	PRKACA
ENSG00000072071	-0.192173	0.194093	0.99966	1585.57	1493.69	1813.08	1705.22	ADGRL1
ENSG00000072110	-0.227362	0.0974503	0.99966	5015.43	4990.22	5653.37	6060.35	ACTN1
ENSG00000072121	-0.199078	0.258932	0.99966	475.879	540.617	599.051	567.179	ZFYVE26
ENSG00000072133	-0.194812	0.457518	0.99966	125.724	117.677	143.347	135.35	RPS6KA6
ENSG00000072134	0.0823178	0.636246	0.99966	546.534	615.185	538.88	557.972	EPN2
ENSG00000072135	-0.243768	0.332553	0.99966	153.778	135.154	186.706	155.606	PTPN18
ENSG00000072163	0.139343	0.674255	0.99966	103.904	68.7422	73.4434	83.7879	LIMS2
ENSG00000072195	0.00787035	0.973212	0.99966	213.003	201.566	232.718	179.545	SPEG
ENSG00000072201	-0.00712175	0.976123	0.99966	165.207	202.731	178.742	190.594	LNX1
ENSG00000072210	0.0157839	0.918951	0.99966	974.617	984.529	987.504	950.21	ALDH3A2
ENSG00000072274	-0.100861	0.851256	0.99966	4980.11	8570.64	5342.79	9189.04	TFRC
ENSG00000072310	-0.152285	0.390171	0.99966	4590.47	5720.75	4886.2	6572.28	SREBF1
ENSG00000072364	0.047033	0.761701	0.99966	1300.87	1501.84	1350.3	1361.78	AFF4
ENSG00000072401	0.138622	0.381777	0.99966	876.948	926.273	823.805	813.939	UBE2D1
ENSG00000072415	-0.0175161	0.922891	0.99966	433.279	466.049	470.746	439.196	MPP5
ENSG00000072422	0.193858	0.559958	0.99966	74.8107	76.8981	68.1343	64.4522	RHOBTB1
ENSG00000072501	-0.0981541	0.481543	0.99966	3432.98	3215.74	3566.87	3550.4	SMC1A
ENSG00000072506	-0.329695	0.0889565	0.99966	602.642	478.865	601.705	758.695	HSD17B10
ENSG00000072518	-0.111876	0.448805	0.99966	1470.24	1416.79	1528.15	1591.97	MARK2
ENSG00000072609	0.0370293	0.826938	0.99966	637.969	727.037	675.149	654.65	CHFR
ENSG00000072682	0.128053	0.388934	0.99966	2807.48	2475.89	2323.64	2511.79	P4HA2
ENSG00000072736	-0.00426129	0.985592	0.99966	168.324	195.741	176.087	188.753	NFATC3
ENSG00000072756	0.114763	0.696916	0.99966	92.4743	120.008	96.4498	99.4406	TRNT1
ENSG00000072778	0.0952542	0.521958	0.99966	5180.64	4326.1	4486.24	4414.06	ACADVL
ENSG00000072786	-0.104004	0.499894	0.99966	1215.67	1233.86	1240.57	1392.17	STK10
ENSG00000072803	-0.102913	0.538566	0.99966	621.344	600.038	638.869	673.065	FBXW11
ENSG00000072818	0.404476	0.116682	0.99966	185.988	147.971	127.42	125.221	ACAP1
ENSG00000072832	-0.170082	0.626171	0.99966	62.3422	61.7515	77.8677	61.69	CRMP1
ENSG00000072840	-0.203274	0.465059	0.99966	112.216	101.366	131.844	114.172	EVC
ENSG00000072849	0.204119	0.229165	0.99966	677.452	742.183	586.663	645.443	DERL2
ENSG00000072858	-0.270385	0.296368	0.99966	200.534	325.069	260.149	372.902	SIDT1
ENSG00000072864	0.145349	0.376908	0.99966	1053.58	905.3	853.006	918.904	NDE1
ENSG00000072952	-0.197532	0.612183	0.99966	42.6005	51.2654	51.3219	56.1655	MRVI1
ENSG00000072954	0.139547	0.574031	0.99966	197.417	153.796	164.584	154.685	TMEM38A
ENSG00000072958	-0.0731453	0.697711	0.99966	549.651	432.261	525.607	508.252	AP1M1
ENSG00000073008	-0.31753	0.0514782	0.99966	694.077	765.486	937.067	881.154	PVR
ENSG00000073050	0.0574943	0.737629	0.99966	625.5	572.075	560.117	591.119	XRCC1
ENSG00000073060	0.105827	0.510312	0.99966	2094.7	2114.7	1732.56	2179.41	SCARB1
ENSG00000073067	0.350143	0.515522	0.99966	23.8979	31.4583	21.2367	22.0979	CYP2W1
ENSG00000073150	-0.137548	0.525616	0.99966	350.156	251.667	339.786	323.182	PANX2
ENSG00000073169	-0.157069	0.386252	0.99966	593.29	481.196	609.669	589.277	SELENOO
ENSG00000073282	0.169872	0.313098	0.99966	1263.47	1618.36	1244.11	1316.67	TP63
ENSG00000073331	0.062202	0.767588	0.99966	273.267	351.867	307.047	290.956	ALPK1
ENSG00000073350	-0.225637	0.125398	0.99966	1642.72	1657.97	1844.05	2015.51	LLGL2
ENSG00000073417	0.256087	0.132414	0.99966	618.227	631.497	536.226	510.093	PDE8A
ENSG00000073464	-0.306152	0.122435	0.99966	620.305	913.456	884.861	1010.06	CLCN4
ENSG00000073536	-0.373868	0.206458	0.99966	86.2401	86.2191	122.111	101.282	NLE1
ENSG00000073578	0.102837	0.511879	0.99966	5863.29	4622.04	4773.82	4991.36	SDHA
ENSG00000073584	-0.109918	0.555247	0.99966	533.026	565.085	520.298	664.779	SMARCE1
ENSG00000073605	0.0995995	0.628114	0.99966	344.96	473.04	382.26	380.268	GSDMB
ENSG00000073614	-0.0455802	0.775304	0.99966	1047.35	1194.25	1207.83	1104.9	KDM5A
ENSG00000073670	0.154179	0.810114	0.99966	17.6636	17.4768	15.9275	15.6527	ADAM11
ENSG00000073711	0.0631596	0.76173	0.99966	270.15	293.611	251.3	288.193	PPP2R3A
ENSG00000073712	-0.0650269	0.714363	0.99966	857.206	1137.16	1078.65	1006.38	FERMT2
ENSG00000073734	0.275446	0.678148	0.99966	18.7027	16.3117	11.5032	17.4942	ABCB11
ENSG00000073737	0.242267	0.166933	0.99966	917.47	907.631	677.803	865.501	DHRS9
ENSG00000073756	0.257792	0.0809674	0.99966	17156.6	20904.6	15889.4	15942.7	PTGS2
ENSG00000073792	0.0403111	0.794829	0.99966	1067.09	1135.99	1105.19	1036.76	IGF2BP2
ENSG00000073803	0.188044	0.249504	0.99966	936.173	831.898	792.835	759.615	MAP3K13
ENSG00000073849	-0.154222	0.610855	0.99966	103.904	80.3935	111.492	93.9161	ST6GAL1
ENSG00000073910	0.339237	0.20863	0.99966	142.348	191.08	115.032	148.24	FRY
ENSG00000073921	0.15907	0.269153	0.99966	2894.76	2940.77	2750.15	2475.89	PICALM
ENSG00000073969	-0.0494181	0.777	0.99966	576.666	671.111	617.633	673.065	NSF
ENSG00000074054	-0.0426148	0.793625	0.99966	748.107	807.43	827.345	774.347	CLASP1
ENSG00000074071	-0.0261868	0.876616	0.99966	1219.83	972.877	1083.07	1150.93	MRPS34
ENSG00000074181	-0.174061	0.350653	0.99966	3494.28	4458.92	3730.57	5241.81	NOTCH3
ENSG00000074201	0.0931641	0.57722	0.99966	732.521	686.257	636.215	694.242	CLNS1A
ENSG00000074211	-0.0121423	0.947709	0.99966	470.684	422.94	423.848	477.867	PPP2R2C
ENSG00000074219	-0.251107	0.264581	0.99966	194.3	177.099	218.561	223.741	TEAD2
ENSG00000074266	0.197283	0.324884	0.99966	444.708	357.693	371.641	328.706	EED
ENSG00000074276	-0.283536	0.528699	0.99966	33.2492	32.6234	44.243	35.9091	CDHR2
ENSG00000074319	0.0459204	0.781197	0.99966	710.702	671.111	656.567	682.273	TSG101
ENSG00000074356	0.0569251	0.725309	0.99966	747.068	772.476	743.283	717.261	NCBP3
ENSG00000074416	-0.134482	0.386805	0.99966	919.548	964.722	1018.47	1049.65	MGLL
ENSG00000074527	-0.205419	0.14935	0.99966	5141.16	5816.29	6134.74	6498.62	NTN4
ENSG00000074582	-0.248114	0.293254	0.99966	174.558	152.631	194.669	194.277	BCS1L
ENSG00000074590	-0.330593	0.10342	0.99966	263.915	294.776	376.066	325.944	NUAK1
ENSG00000074603	0.0330802	0.852767	0.99966	457.176	482.361	452.164	465.897	DPP8
ENSG00000074621	-0.0151294	0.940811	0.99966	272.228	286.62	292.889	271.62	SLC24A1
ENSG00000074657	-0.1122	0.601272	0.99966	254.564	340.216	336.247	305.688	ZNF532
ENSG00000074695	0.246985	0.165685	0.99966	1239.57	1616.03	1098.11	1307.46	LMAN1
ENSG00000074696	0.18082	0.253624	0.99966	1369.45	1628.84	1294.55	1349.81	HACD3
ENSG00000074755	-0.146935	0.359637	0.99966	924.743	1071.91	1085.72	1124.23	ZZEF1
ENSG00000074800	0.18566	0.268496	0.99966	24364.4	18624.5	17146.8	20652.3	ENO1
ENSG00000074842	-0.147048	0.401139	0.99966	978.773	934.428	921.14	1197.89	MYDGF
ENSG00000074855	-0.0902595	0.599606	0.99966	704.467	816.751	865.394	753.17	ANO8
ENSG00000074935	-0.065407	0.777689	0.99966	177.675	208.557	191.13	212.692	TUBE1
ENSG00000074964	-0.0383147	0.812517	0.99966	772.005	837.723	844.157	808.415	ARHGEF10L
ENSG00000075089	0.190275	0.360943	0.99966	268.072	284.29	234.488	249.522	ACTR6
ENSG00000075131	-0.0075598	0.980079	0.99966	101.826	83.8888	88.4861	98.5198	TIPIN
ENSG00000075142	0.0985019	0.531494	0.99966	1600.12	1352.71	1355.61	1403.22	SRI
ENSG00000075151	-0.100124	0.51709	0.99966	1480.63	1670.79	1777.68	1599.34	EIF4G3
ENSG00000075188	0.0822575	0.673423	0.99966	478.996	377.5	396.418	413.415	NUP37
ENSG00000075213	-0.229343	0.3464	0.99966	143.387	179.429	196.439	181.387	SEMA3A
ENSG00000075218	0.039372	0.843276	0.99966	754.341	532.461	584.008	669.382	GTSE1
ENSG00000075223	0.197997	0.242057	0.99966	2742.02	3678.29	2920.92	2674.77	SEMA3C
ENSG00000075234	-0.0498155	0.859242	0.99966	108.06	103.696	110.608	108.648	TTC38
ENSG00000075239	0.19437	0.376911	0.99966	229.627	236.52	193.784	213.613	ACAT1
ENSG00000075240	-0.162186	0.363542	0.99966	449.903	496.342	508.795	549.685	GRAMD4
ENSG00000075275	-0.0806481	0.583734	0.99966	2033.4	2295.29	2275.86	2300.94	CELSR1
ENSG00000075292	0.0499371	0.746593	0.99966	1444.26	1677.78	1532.58	1482.4	ZNF638
ENSG00000075303	-0.053572	0.79338	0.99966	315.867	306.427	355.714	290.035	SLC25A40
ENSG00000075336	-0.282075	0.187042	0.99966	229.627	207.392	260.149	271.62	TIMM21
ENSG00000075340	0.219009	0.600138	0.99966	48.8348	52.4305	32.7398	54.324	ADD2
ENSG00000075391	-0.136125	0.446839	0.99966	751.224	949.575	1006.97	860.897	RASAL2
ENSG00000075399	0.230579	0.205575	0.99966	474.84	494.012	390.224	435.513	VPS9D1
ENSG00000075407	-0.0569901	0.808644	0.99966	171.441	201.566	206.173	181.387	ZNF37A
ENSG00000075413	0.000948724	0.994794	0.99966	1763.25	1720.89	1779.45	1702.46	MARK3
ENSG00000075415	0.0279679	0.846394	0.99966	4711	4941.29	4409.26	5057.66	SLC25A3
ENSG00000075420	0.0925366	0.554632	0.99966	2505.12	3088.74	2545.74	2699.63	FNDC3B
ENSG00000075426	-0.0616888	0.656549	0.99966	4523.97	4505.53	4903.9	4519.94	FOSL2
ENSG00000075461	-0.140931	0.722331	0.99966	65.4594	52.4305	85.8315	44.1958	CACNG4
ENSG00000075539	-0.0696782	0.668178	0.99966	1051.51	1236.2	1260.04	1139.88	FRYL
ENSG00000075568	-0.114884	0.518181	0.99966	651.476	838.888	803.453	809.336	TMEM131
ENSG00000075618	-0.0217669	0.890832	0.99966	4366.03	3519.84	3762.43	4244.64	FSCN1
ENSG00000075624	0.0147042	0.916208	0.99966	53543.7	51886.4	48575.3	55786.2	ACTB
ENSG00000075643	-0.357896	0.225939	0.99966	86.2401	85.054	101.759	117.855	MOCOS
ENSG00000075651	0.283215	0.129863	0.99966	511.206	645.478	488.443	461.294	PLD1
ENSG00000075673	-0.495624	0.440342	0.99966	11.4294	17.4768	21.2367	19.3357	ATP12A
ENSG00000075702	-0.148726	0.483389	0.99966	288.852	240.015	311.471	275.303	WDR62
ENSG00000075711	-0.143504	0.311612	0.99966	2817.87	3063.11	3304.07	3191.31	DLG1
ENSG00000075785	-0.155455	0.289567	0.99966	3294.79	2840.57	3412.91	3421.49	RAB7A
ENSG00000075790	0.0810328	0.63363	0.99966	600.564	577.901	564.541	549.685	BCAP29
ENSG00000075826	0.639203	0.148278	0.99966	37.4053	69.9074	32.7398	35.9091	SEC31B
ENSG00000075856	-0.278441	0.0880688	0.99966	661.867	633.827	793.72	778.03	SART3
ENSG00000075914	0.431012	0.0522605	0.99966	262.876	242.346	175.202	199.802	EXOSC7
ENSG00000075945	0.064107	0.768905	0.99966	234.822	226.034	231.833	209.009	KIFAP3
ENSG00000075975	0.180024	0.488305	0.99966	162.09	224.869	146.887	194.277	MKRN2
ENSG00000076043	0.127023	0.449419	0.99966	768.888	708.395	641.524	711.737	REXO2
ENSG00000076053	0.209214	0.255327	0.99966	485.23	439.251	413.23	386.713	RBM7
ENSG00000076067	-0.189005	0.256062	0.99966	1036.96	1265.32	1237.92	1385.72	RBMS2
ENSG00000076108	-0.135624	0.339882	0.99966	2110.28	2203.25	2354.61	2383.81	BAZ2A
ENSG00000076201	-0.190099	0.284402	0.99966	514.323	624.506	657.451	640.839	PTPN23
ENSG00000076242	-0.00876091	0.963799	0.99966	338.726	327.399	341.556	328.706	MLH1
ENSG00000076248	-0.274222	0.107057	0.99966	542.377	510.324	635.33	638.077	UNG
ENSG00000076258	0.306829	0.524823	0.99966	39.4834	34.9537	38.049	22.0979	FMO4
ENSG00000076321	-0.226175	0.274514	0.99966	240.018	262.153	305.277	281.748	KLHL20
ENSG00000076351	-0.22092	0.381093	0.99966	153.778	126.998	161.045	166.655	SLC46A1
ENSG00000076382	-0.0382207	0.828421	0.99966	642.125	545.277	588.432	631.632	SPAG5
ENSG00000076513	0.00487619	0.978586	0.99966	1747.66	2485.21	1990.05	2227.28	ANKRD13A
ENSG00000076554	0.106283	0.512273	0.99966	953.836	849.374	817.611	858.135	TPD52
ENSG00000076555	-0.245905	0.491893	0.99966	57.1471	60.5864	80.5223	58.9277	ACACB
ENSG00000076604	-0.0733511	0.618842	0.99966	2409.53	2148.49	2469.65	2326.72	TRAF4
ENSG00000076641	0.199401	0.261017	0.99966	746.029	819.081	754.786	607.692	PAG1
ENSG00000076650	-0.0578035	0.836116	0.99966	116.372	106.026	124.765	106.807	GPATCH1
ENSG00000076685	-0.143375	0.475162	0.99966	794.864	1148.81	945.031	1200.65	NT5C2
ENSG00000076706	0.240694	0.585835	0.99966	37.4053	48.9352	42.4733	30.3846	MCAM
ENSG00000076716	-0.0949025	0.698991	0.99966	265.994	244.676	335.362	209.93	GPC4
ENSG00000076770	0.199484	0.389281	0.99966	198.456	191.08	169.893	169.417	MBNL3
ENSG00000076826	-0.154461	0.427608	0.99966	373.014	421.774	398.187	486.154	CAMSAP3
ENSG00000076864	-0.147238	0.485937	0.99966	246.252	259.822	257.494	302.925	RAP1GAP
ENSG00000076924	-0.0643369	0.702192	0.99966	621.344	626.836	623.827	681.352	XAB2
ENSG00000076928	-0.218766	0.166565	0.99966	1459.85	1311.93	1731.67	1494.37	ARHGEF1
ENSG00000076944	0.0413948	0.79958	0.99966	747.068	710.725	709.658	707.133	STXBP2
ENSG00000076984	-0.167988	0.328099	0.99966	513.284	545.277	581.353	607.692	MAP2K7
ENSG00000077044	-0.0121444	0.950597	0.99966	386.522	353.032	405.266	340.676	DGKD
ENSG00000077097	-0.11802	0.503371	0.99966	616.149	773.641	749.477	757.774	TOP2B
ENSG00000077147	0.0624317	0.670789	0.99966	3392.46	3855.39	3321.77	3618.53	TM9SF3
ENSG00000077150	-0.0144277	0.922854	0.99966	2865.66	2453.75	2670.51	2703.31	NFKB2
ENSG00000077152	-0.0262838	0.909558	0.99966	358.468	238.85	326.514	282.669	UBE2T
ENSG00000077157	0.0423322	0.845264	0.99966	233.783	277.299	262.804	232.949	PPP1R12B
ENSG00000077232	0.0818883	0.638518	0.99966	846.815	1092.89	924.679	906.935	DNAJC10
ENSG00000077235	-0.119737	0.439706	0.99966	1953.39	2234.71	2121.01	2428.93	GTF3C1
ENSG00000077238	0.062145	0.670089	0.99966	2275.49	2061.1	2090.93	2063.39	IL4R
ENSG00000077254	0.0958573	0.574158	0.99966	622.383	703.734	634.445	605.851	USP33
ENSG00000077312	-0.12206	0.501681	0.99966	552.768	503.333	523.837	626.107	SNRPA
ENSG00000077348	-0.110364	0.684107	0.99966	136.114	110.687	143.347	123.38	EXOSC5
ENSG00000077380	0.0456503	0.753474	0.99966	1694.67	1678.94	1612.22	1656.42	DYNC1I2
ENSG00000077454	0.0449276	0.806456	0.99966	488.348	579.066	546.844	487.075	LRCH4
ENSG00000077458	-0.142365	0.546415	0.99966	180.792	184.089	222.985	179.545	FAM76B
ENSG00000077463	0.0282493	0.896456	0.99966	270.15	235.355	229.179	267.016	SIRT6
ENSG00000077514	0.0308657	0.889258	0.99966	226.51	223.704	238.027	202.564	POLD3
ENSG00000077549	-0.0229138	0.876746	0.99966	2616.3	2357.04	2412.13	2641.62	CAPZB
ENSG00000077585	0.0418442	0.873041	0.99966	152.738	124.668	134.499	135.35	GPR137B
ENSG00000077684	-0.174979	0.491457	0.99966	137.153	128.163	147.772	151.923	JADE1
ENSG00000077713	-0.117769	0.613282	0.99966	175.597	196.906	186.706	217.296	SLC25A43
ENSG00000077721	-0.0449882	0.779049	0.99966	1281.13	1076.57	1208.72	1224.59	UBE2A
ENSG00000077942	-0.184522	0.194014	0.99966	4506.3	4601.07	4859.65	5490.41	FBLN1
ENSG00000078018	-0.326076	0.287128	0.99966	73.7717	89.7144	109.723	94.8368	MAP2
ENSG00000078043	-0.0234569	0.932245	0.99966	108.06	117.677	112.377	116.935	PIAS2
ENSG00000078061	0.0518758	0.74689	0.99966	775.122	771.311	743.283	748.566	ARAF
ENSG00000078070	0.148342	0.425769	0.99966	417.693	408.958	357.484	388.555	MCCC1
ENSG00000078081	0.271585	0.32927	0.99966	134.036	140.98	131.844	95.7576	LAMP3
ENSG00000078098	0.89096	0.120337	0.99966	36.3663	26.7978	23.0064	11.049	FAP
ENSG00000078114	-0.10842	0.577518	0.99966	640.047	930.933	818.496	873.788	NEBL
ENSG00000078124	0.125966	0.5309	0.99966	337.687	385.656	302.622	360.012	ACER3
ENSG00000078140	-0.0735738	0.651312	0.99966	1191.78	1004.34	1112.27	1199.73	UBE2K
ENSG00000078142	0.0426692	0.832943	0.99966	278.462	301.767	283.155	279.907	PIK3C3
ENSG00000078177	-0.0692912	0.748377	0.99966	219.237	262.153	249.531	255.047	N4BP2
ENSG00000078237	-0.183243	0.435535	0.99966	178.714	201.566	239.797	191.515	TIGAR
ENSG00000078246	-0.0365474	0.855706	0.99966	318.984	280.795	304.392	311.212	TULP3
ENSG00000078269	0.181683	0.243849	0.99966	1659.34	1934.1	1514	1653.66	SYNJ2
ENSG00000078304	0.0969907	0.521339	0.99966	1429.72	1407.47	1264.47	1388.48	PPP2R5C
ENSG00000078319	0.0664187	0.821959	0.99966	128.841	90.8796	103.529	106.807	PMS2P1
ENSG00000078369	-0.127959	0.362533	0.99966	2938.4	2757.85	3137.72	3087.26	GNB1
ENSG00000078401	0.094086	0.539671	0.99966	8957.54	10673.7	8509.7	9881.45	EDN1
ENSG00000078403	0.0744093	0.718001	0.99966	264.955	295.941	268.113	264.254	MLLT10
ENSG00000078487	0.152739	0.508544	0.99966	195.339	209.722	193.784	170.338	ZCWPW1
ENSG00000078618	-0.0208479	0.889122	0.99966	1740.39	1942.26	1810.42	1925.28	NRDC
ENSG00000078668	0.135315	0.337304	0.99966	4843.99	4427.47	4093.37	4348.68	VDAC3
ENSG00000078674	0.0373384	0.82577	0.99966	574.588	603.534	576.929	570.862	PCM1
ENSG00000078687	0.0554516	0.802335	0.99966	230.666	299.437	240.682	268.858	TNRC6C
ENSG00000078699	-0.106698	0.554188	0.99966	438.474	505.663	512.334	503.648	CBFA2T2
ENSG00000078804	-0.0761717	0.640575	0.99966	949.68	1046.28	976.886	1126.99	TP53INP2
ENSG00000078808	-0.112925	0.483611	0.99966	3682.35	2902.32	3376.63	3745.59	SDF4
ENSG00000078814	0.457298	0.360543	0.99966	33.2492	33.7886	21.2367	27.6224	MYH7B
ENSG00000078900	-0.2515	0.39415	0.99966	132.997	87.3842	145.117	117.855	TP73
ENSG00000078902	-0.125752	0.464103	0.99966	708.623	605.864	740.628	694.242	TOLLIP
ENSG00000078967	-0.253549	0.263323	0.99966	177.675	189.915	208.827	229.266	UBE2D4
ENSG00000079134	-0.142096	0.584447	0.99966	120.528	147.971	152.196	143.636	THOC1
ENSG00000079150	0.633523	0.366425	0.99966	23.8979	16.3117	19.4669	6.44522	FKBP7
ENSG00000079246	-0.0302126	0.836831	0.99966	2238.09	2014.5	2130.74	2212.55	XRCC5
ENSG00000079277	0.0988045	0.539064	0.99966	797.981	844.714	754.786	778.951	MKNK1
ENSG00000079308	0.273484	0.487119	0.99966	49.8738	62.9166	39.8187	53.4033	TNS1
ENSG00000079313	-0.101007	0.565876	0.99966	485.23	474.205	530.916	498.124	REXO1
ENSG00000079332	0.159706	0.281515	0.99966	1605.31	1526.31	1430.82	1372.83	SAR1A
ENSG00000079335	0.0262613	0.947737	0.99966	48.8348	54.7608	61.9402	39.5921	CDC14A
ENSG00000079337	0.0692152	0.662495	0.99966	1044.23	1195.42	1048.56	1085.56	RAPGEF3
ENSG00000079385	0.0778156	0.731887	0.99966	265.994	375.17	270.767	336.072	CEACAM1
ENSG00000079387	-0.148075	0.477389	0.99966	247.291	302.932	307.931	301.084	SENP1
ENSG00000079432	-0.184899	0.247393	0.99966	1191.78	1077.74	1377.73	1202.49	CIC
ENSG00000079435	-0.0740959	0.805665	0.99966	110.138	81.5586	98.2195	104.044	LIPE
ENSG00000079459	-0.252894	0.611303	0.99966	553.807	784.128	559.232	1034.92	FDFT1
ENSG00000079462	0.0233829	0.90683	0.99966	414.576	327.399	370.757	360.012	PAFAH1B3
ENSG00000079482	-0.0172522	0.955615	0.99966	96.6305	196.906	144.232	151.923	OPHN1
ENSG00000079616	-0.0545788	0.750783	0.99966	1390.23	1068.42	1234.38	1320.35	KIF22
ENSG00000079691	-0.0369662	0.841361	0.99966	840.581	1117.35	915.831	1092	CARMIL1
ENSG00000079739	0.198283	0.354727	0.99966	330.414	270.308	242.452	281.748	PGM1
ENSG00000079785	-0.16869	0.282316	0.99966	1089.95	968.217	1149.43	1164.74	DDX1
ENSG00000079805	-0.115007	0.40985	0.99966	4639.3	4383.19	4703.03	5068.71	DNM2
ENSG00000079819	-0.139237	0.40306	0.99966	644.203	615.185	714.082	673.065	EPB41L2
ENSG00000079950	0.191359	0.248607	0.99966	753.302	745.679	688.422	624.266	STX7
ENSG00000079974	0.047957	0.815049	0.99966	271.189	294.776	263.688	283.59	RABL2B
ENSG00000079999	-0.100305	0.538261	0.99966	1070.21	901.805	1045.02	1069.91	KEAP1
ENSG00000080189	-0.111649	0.472615	0.99966	964.227	1046.28	1096.34	1075.43	SLC35C2
ENSG00000080200	0.185719	0.478536	0.99966	225.471	422.94	269.882	299.242	CRYBG3
ENSG00000080298	0.308657	0.515748	0.99966	41.5615	39.6142	43.3582	22.0979	RFX3
ENSG00000080345	-0.165664	0.311322	0.99966	656.672	676.936	762.75	732.914	RIF1
ENSG00000080371	-0.0534836	0.720675	0.99966	1655.19	1500.68	1667.96	1607.62	RAB21
ENSG00000080503	-0.176342	0.323343	0.99966	486.269	439.251	537.995	508.252	SMARCA2
ENSG00000080546	0.0256852	0.928344	0.99966	109.099	100.201	103.529	102.203	SESN1
ENSG00000080561	-0.129709	0.583262	0.99966	180.792	179.429	176.972	217.296	MID2
ENSG00000080603	-0.204293	0.435362	0.99966	117.411	126.998	145.117	136.27	SRCAP
ENSG00000080608	-0.238215	0.358662	0.99966	172.48	131.659	201.748	157.448	PUM3
ENSG00000080802	-0.144198	0.553342	0.99966	145.465	175.934	175.202	179.545	CNOT4
ENSG00000080815	0.0858653	0.571514	0.99966	1601.16	1833.9	1626.37	1609.46	PSEN1
ENSG00000080819	-0.0529385	0.760154	0.99966	619.266	540.617	602.59	601.247	CPOX
ENSG00000080822	0.142205	0.334296	0.99966	1768.44	1934.1	1674.16	1680.36	CLDND1
ENSG00000080823	0.027469	0.904433	0.99966	206.768	283.125	245.991	233.869	MOK
ENSG00000080824	-0.0365343	0.792866	0.99966	18520.8	16714.9	17367.2	18773.1	HSP90AA1
ENSG00000080839	-0.151123	0.527182	0.99966	200.534	166.613	223.87	184.149	RBL1
ENSG00000080845	-0.138747	0.341401	0.99966	1892.09	2050.62	2114.82	2225.44	DLGAP4
ENSG00000080947	-0.30923	0.554284	0.99966	18.7027	30.2932	30.9701	29.4639	CROCCP3
ENSG00000080986	-0.035578	0.880961	0.99966	363.663	226.034	303.507	302.005	NDC80
ENSG00000081014	0.162759	0.403509	0.99966	343.921	390.316	317.665	337.914	AP4E1
ENSG00000081019	-0.134959	0.607293	0.99966	156.895	150.301	199.094	138.112	RSBN1
ENSG00000081026	-0.0667592	0.744645	0.99966	260.798	292.446	298.198	280.828	MAGI3
ENSG00000081041	-0.230121	0.541169	0.99966	47.7957	52.4305	53.9765	63.5315	CXCL2
ENSG00000081059	-0.488806	0.250976	0.99966	33.2492	34.9537	47.7825	47.8788	TCF7
ENSG00000081087	-0.030638	0.886394	0.99966	250.408	329.73	301.737	290.035	OSTM1
ENSG00000081154	0.0593884	0.700092	0.99966	1257.24	1172.11	1122	1209.86	PCNP
ENSG00000081177	-0.0293968	0.877116	0.99966	357.429	398.472	400.842	370.14	EXD2
ENSG00000081181	0.490167	0.141397	0.99966	93.5134	81.5586	54.8614	69.9767	ARG2
ENSG00000081189	0.635172	0.231581	0.99966	27.015	36.1188	22.1215	18.4149	MEF2C
ENSG00000081277	0.0496676	0.740869	0.99966	2880.21	2569.1	2474.96	2790.78	PKP1
ENSG00000081307	-0.114499	0.588974	0.99966	225.471	245.841	252.185	257.809	UBA5
ENSG00000081320	-0.0569604	0.802361	0.99966	200.534	191.08	215.906	191.515	STK17B
ENSG00000081377	0.0425308	0.803108	0.99966	588.095	638.487	613.208	577.308	CDC14B
ENSG00000081386	-0.324814	0.182991	0.99966	139.231	145.64	171.663	185.07	ZNF510
ENSG00000081479	0.731898	0.357183	0.99966	7.27326	24.4676	8.84861	10.1282	LRP2
ENSG00000081665	0.0666419	0.739121	0.99966	294.048	314.583	297.313	283.59	ZNF506
ENSG00000081692	-0.253066	0.287214	0.99966	155.856	153.796	185.821	183.228	JMJD4
ENSG00000081721	0.267769	0.326299	0.99966	163.129	124.668	110.608	128.904	DUSP12
ENSG00000081760	-0.127468	0.481696	0.99966	516.402	468.379	499.946	576.387	AACS
ENSG00000081791	0.0282092	0.885015	0.99966	317.945	326.234	318.55	313.054	KIAA0141
ENSG00000081803	-0.320153	0.647885	0.99966	11.4294	13.9815	13.2729	18.4149	CADPS2
ENSG00000081818	-0.382649	0.619373	0.99966	12.4684	8.15586	15.9275	11.049	PCDHB4
ENSG00000081870	0.0829702	0.715517	0.99966	373.014	251.667	281.386	309.371	HSPB11
ENSG00000081913	-0.00952014	0.959812	0.99966	371.975	433.426	411.46	398.683	PHLPP1
ENSG00000081923	0.345675	0.104795	0.99966	482.113	654.799	381.375	512.855	ATP8B1
ENSG00000082014	0.0239025	0.942308	0.99966	74.8107	71.0725	69.904	73.6597	SMARCD3
ENSG00000082068	0.0856819	0.611213	0.99966	792.785	685.092	699.04	694.242	WDR70
ENSG00000082074	0.0410958	0.792853	0.99966	2503.04	2817.27	2814.74	2355.27	FYB1
ENSG00000082146	0.141631	0.671867	0.99966	66.4984	100.201	76.098	74.5804	STRADB
ENSG00000082196	-0.0977688	0.809872	0.99966	56.108	37.2839	46.8976	53.4033	C1QTNF3
ENSG00000082212	0.0525486	0.79309	0.99966	294.048	333.225	307.931	296.48	ME2
ENSG00000082213	0.0478813	0.790106	0.99966	461.333	453.233	457.473	427.226	C5orf22
ENSG00000082258	0.152138	0.400258	0.99966	487.309	573.24	478.71	475.105	CCNT2
ENSG00000082269	0.171042	0.458212	0.99966	216.12	270.308	237.143	194.277	FAM135A
ENSG00000082438	0.159866	0.305712	0.99966	1255.16	1378.34	1237.04	1119.63	COBLL1
ENSG00000082458	0.178156	0.31433	0.99966	587.056	582.561	477.825	556.131	DLG3
ENSG00000082497	0.0345773	0.887174	0.99966	153.778	178.264	165.469	158.368	SERTAD4
ENSG00000082512	-0.227882	0.628306	0.99966	43.6396	24.4676	46.0128	34.0676	TRAF5
ENSG00000082515	-0.0111015	0.952985	0.99966	521.597	433.426	451.279	511.935	MRPL22
ENSG00000082516	-0.317431	0.205642	0.99966	135.075	145.64	191.13	158.368	GEMIN5
ENSG00000082641	-0.0173534	0.908947	0.99966	10709.4	13135.6	11540.4	12592.1	NFE2L1
ENSG00000082701	-0.202896	0.191998	0.99966	995.398	1087.06	1163.59	1232.88	GSK3B
ENSG00000082781	-0.267613	0.0787207	0.99966	1155.41	1124.34	1317.56	1427.16	ITGB5
ENSG00000082805	-0.20501	0.210121	0.99966	646.281	683.927	773.368	759.615	ERC1
ENSG00000082898	-0.0411156	0.769761	0.99966	2916.58	2855.72	3055.42	2883.78	XPO1
ENSG00000082996	0.252634	0.131906	0.99966	935.134	1120.85	899.903	824.988	RNF13
ENSG00000083093	-0.0571617	0.821427	0.99966	196.378	196.906	246.876	162.051	PALB2
ENSG00000083097	0.0115041	0.961488	0.99966	220.276	342.546	262.804	294.639	DOPEY1
ENSG00000083099	-0.0582979	0.749703	0.99966	409.381	398.472	415	426.305	LYRM2
ENSG00000083123	0.321967	0.166087	0.99966	217.159	213.217	156.62	187.832	BCKDHB
ENSG00000083168	-0.230594	0.120739	0.99966	2357.58	2528.32	3056.31	2675.69	KAT6A
ENSG00000083223	-0.046288	0.784634	0.99966	1089.95	1405.14	1272.43	1302.86	ZCCHC6
ENSG00000083290	0.0832635	0.760562	0.99966	134.036	178.264	170.778	123.38	ULK2
ENSG00000083307	-0.145468	0.347411	0.99966	1119.04	1254.84	1341.45	1283.52	GRHL2
ENSG00000083312	-0.0879574	0.597164	0.99966	1352.83	1598.55	1423.74	1712.59	TNPO1
ENSG00000083444	-0.0252224	0.862804	0.99966	4235.12	3906.66	3874.8	4411.29	PLOD1
ENSG00000083454	-0.189079	0.79065	0.99966	11.4294	13.9815	13.2729	15.6527	P2RX5
ENSG00000083457	0.339108	0.103267	0.99966	299.243	283.125	222.1	238.473	ITGAE
ENSG00000083520	-0.0982635	0.560027	0.99966	587.056	573.24	634.445	607.692	DIS3
ENSG00000083535	0.0933914	0.704344	0.99966	154.817	163.117	146.002	151.923	PIBF1
ENSG00000083544	0.0463723	0.87883	0.99966	93.5134	86.2191	87.6012	86.5501	TDRD3
ENSG00000083635	0.0963954	0.790609	0.99966	60.2642	59.4213	53.9765	58.007	NUFIP1
ENSG00000083642	-0.0934241	0.601043	0.99966	529.909	548.773	623.827	526.667	PDS5B
ENSG00000083720	-0.163301	0.376059	0.99966	413.537	376.335	453.049	431.83	OXCT1
ENSG00000083750	0.0880466	0.707659	0.99966	192.222	195.741	199.094	165.734	RRAGB
ENSG00000083799	0.0176604	0.923267	0.99966	552.768	604.699	631.79	511.014	CYLD
ENSG00000083807	0.112618	0.769875	0.99966	60.2642	47.77	52.2068	47.8788	SLC27A5
ENSG00000083814	0.0519487	0.900573	0.99966	47.7957	45.4398	53.9765	35.9091	ZNF671
ENSG00000083817	-0.391851	0.267343	0.99966	59.2251	59.4213	63.71	92.0746	ZNF416
ENSG00000083828	0.367565	0.226939	0.99966	95.5914	104.861	76.098	79.1841	ZNF586
ENSG00000083838	-0.146971	0.601222	0.99966	100.787	111.852	126.535	108.648	ZNF446
ENSG00000083844	0.248286	0.238672	0.99966	307.555	337.886	301.737	241.235	ZNF264
ENSG00000083845	0.0826225	0.605835	0.99966	7036.36	6410.51	5555.15	7144.07	RPS5
ENSG00000083857	-0.0864913	0.624118	0.99966	11329.7	16152.1	13671.1	15507.2	FAT1
ENSG00000083896	-0.151893	0.316576	0.99966	1573.1	1646.32	1902.45	1673.92	YTHDC1
ENSG00000083937	0.0845002	0.595966	0.99966	899.806	864.521	806.108	858.135	CHMP2B
ENSG00000084070	-0.169947	0.415987	0.99966	235.861	240.015	262.804	272.541	SMAP2
ENSG00000084072	-0.0379602	0.838555	0.99966	396.912	413.619	391.993	440.117	PPIE
ENSG00000084073	0.0662741	0.709598	0.99966	660.828	801.604	650.373	745.804	ZMPSTE24
ENSG00000084090	-0.092314	0.555992	0.99966	1126.32	1302.61	1283.93	1304.7	STARD7
ENSG00000084092	0.243309	0.242507	0.99966	354.312	357.693	261.034	340.676	NOA1
ENSG00000084093	0.0997877	0.561027	0.99966	554.846	588.387	536.226	530.35	REST
ENSG00000084112	-0.102015	0.559886	0.99966	519.519	603.534	605.245	599.406	SSH1
ENSG00000084207	-0.00281141	0.98529	0.99966	10825.7	9528.37	9255.64	11139.2	GSTP1
ENSG00000084234	-0.0541846	0.684739	0.99966	9923.85	10232.1	10341.4	10585.8	APLP2
ENSG00000084444	-0.186011	0.540773	0.99966	76.8888	95.5401	98.2195	97.5991	FAM234B
ENSG00000084463	-0.0746267	0.621315	0.99966	1234.38	1186.09	1304.28	1244.85	WBP11
ENSG00000084623	0.0722825	0.627582	0.99966	1866.11	1809.44	1652.03	1844.25	EIF3I
ENSG00000084636	0.428645	0.0758533	0.99966	191.183	217.878	165.469	138.112	COL16A1
ENSG00000084652	-0.153823	0.331331	0.99966	807.332	793.449	902.558	878.392	TXLNA
ENSG00000084676	-0.166603	0.426952	0.99966	258.72	326.234	309.701	346.2	NCOA1
ENSG00000084693	0.177119	0.408696	0.99966	252.486	291.281	225.639	255.047	AGBL5
ENSG00000084710	-0.565865	0.27545	0.99966	25.9759	26.7978	23.8912	54.324	EFR3B
ENSG00000084733	-0.124307	0.411288	0.99966	2337.83	2001.68	2427.17	2303.71	RAB10
ENSG00000084754	0.105716	0.51116	0.99966	1613.62	1726.71	1396.31	1707.98	HADHA
ENSG00000084764	-0.20095	0.274439	0.99966	370.936	377.5	424.733	435.513	MAPRE3
ENSG00000085063	0.1711	0.219196	0.99966	6531.39	5993.39	5720.62	5403.86	CD59
ENSG00000085117	0.0612514	0.697064	0.99966	4832.56	4758.36	4042.04	5150.65	CD82
ENSG00000085185	-0.0324728	0.903036	0.99966	162.09	121.173	155.735	134.429	BCORL1
ENSG00000085224	0.0848198	0.578035	0.99966	1946.12	1932.94	1971.47	1685.89	ATRX
ENSG00000085231	0.0854749	0.732749	0.99966	179.753	147.971	163.699	145.478	AK6
ENSG00000085274	0.180386	0.509043	0.99966	151.699	165.447	168.124	111.41	MYNN
ENSG00000085276	0.0214388	0.919225	0.99966	321.063	448.572	399.072	358.17	MECOM
ENSG00000085365	0.218517	0.200672	0.99966	617.188	686.257	562.771	557.051	SCAMP1
ENSG00000085377	-0.243606	0.14742	0.99966	735.638	664.12	779.562	878.392	PREP
ENSG00000085382	0.155842	0.530096	0.99966	165.207	201.566	181.396	147.319	HACE1
ENSG00000085415	0.136493	0.529194	0.99966	242.096	243.511	234.488	207.168	SEH1L
ENSG00000085433	-0.0194284	0.926053	0.99966	254.564	244.676	257.494	248.601	WDR47
ENSG00000085449	0.0959005	0.61104	0.99966	403.146	383.325	351.29	384.872	WDFY1
ENSG00000085465	-0.150433	0.757883	0.99966	30.1321	31.4583	42.4733	25.7809	OVGP1
ENSG00000085491	0.0308238	0.859183	0.99966	598.486	534.791	561.002	548.765	SLC25A24
ENSG00000085511	-0.184446	0.285276	0.99966	555.885	530.131	647.718	586.515	MAP3K4
ENSG00000085514	0.607957	0.366587	0.99966	20.7807	16.3117	11.5032	12.8904	PILRA
ENSG00000085552	-0.241473	0.142452	0.99966	702.389	644.313	778.677	813.939	IGSF9
ENSG00000085563	-0.297599	0.432256	0.99966	42.6005	81.5586	66.3645	85.6294	ABCB1
ENSG00000085644	-0.0799762	0.698131	0.99966	299.243	255.162	295.543	290.956	ZNF213
ENSG00000085662	0.178082	0.427145	0.99966	713.819	734.027	471.631	808.415	AKR1B1
ENSG00000085719	0.0860595	0.590694	0.99966	975.656	1115.02	964.498	1004.53	CPNE3
ENSG00000085721	-0.045186	0.789874	0.99966	563.158	593.047	604.36	588.357	RRN3
ENSG00000085733	-0.111767	0.4235	0.99966	2996.58	2924.46	3273.98	3124.09	CTTN
ENSG00000085741	-0.182867	0.575644	0.99966	69.6155	75.733	91.1406	73.6597	WNT11
ENSG00000085760	-0.0397883	0.831433	0.99966	443.669	555.764	500.831	525.746	MTIF2
ENSG00000085788	0.017204	0.910551	0.99966	1272.82	1429.61	1326.41	1343.37	DDHD2
ENSG00000085831	-0.0277137	0.954144	0.99966	24.9369	40.7793	35.3944	31.3054	TTC39A
ENSG00000085832	-0.0302217	0.86749	0.99966	565.236	717.716	637.984	671.224	EPS15
ENSG00000085840	-0.164856	0.549718	0.99966	111.177	103.696	118.571	122.459	ORC1
ENSG00000085872	-0.25889	0.099865	0.99966	807.332	815.586	952.11	989.802	CHERP
ENSG00000085978	-0.0666041	0.747793	0.99966	247.291	272.639	271.652	272.541	ATG16L1
ENSG00000085982	-0.088909	0.615442	0.99966	458.215	452.068	487.558	480.629	USP40
ENSG00000085998	-0.132999	0.435368	0.99966	596.407	575.571	610.554	674.907	POMGNT1
ENSG00000086015	-0.281852	0.133991	0.99966	430.161	432.261	579.584	468.66	MAST2
ENSG00000086061	-0.0383423	0.806281	0.99966	2223.54	1832.74	2130.74	2035.77	DNAJA1
ENSG00000086062	0.044296	0.778814	0.99966	4035.62	4721.08	3852.68	4638.72	B4GALT1
ENSG00000086065	0.070939	0.690517	0.99966	652.515	545.277	586.663	554.289	CHMP5
ENSG00000086102	-0.0899159	0.636515	0.99966	442.63	457.893	532.686	425.385	NFX1
ENSG00000086189	0.092091	0.634737	0.99966	336.648	337.886	310.586	322.261	DIMT1
ENSG00000086200	0.0275583	0.902076	0.99966	240.018	328.565	298.198	258.73	IPO11
ENSG00000086232	-0.0175245	0.904194	0.99966	2249.52	2316.26	2193.57	2428.01	EIF2AK1
ENSG00000086289	0.357091	0.641577	0.99966	11.4294	15.1466	12.388	8.28671	EPDR1
ENSG00000086300	0.096372	0.796665	0.99966	64.4203	51.2654	50.4371	58.007	SNX10
ENSG00000086475	-0.201438	0.257819	0.99966	545.495	482.361	559.232	623.345	SEPHS1
ENSG00000086504	0.0362078	0.822542	0.99966	1021.37	914.621	902.558	986.119	MRPL28
ENSG00000086544	0.176188	0.299325	0.99966	1223.99	971.712	987.504	956.655	ITPKC
ENSG00000086570	-0.0125583	0.944229	0.99966	2399.14	3235.55	2539.55	3143.43	FAT2
ENSG00000086589	0.00658011	0.969448	0.99966	552.768	537.122	533.571	551.527	RBM22
ENSG00000086598	0.0191562	0.898788	0.99966	3411.16	3702.76	3220.89	3799	TMED2
ENSG00000086619	0.398343	0.181562	0.99966	110.138	106.026	88.4861	75.5012	ERO1B
ENSG00000086666	0.119947	0.425401	0.99966	1294.64	1267.65	1157.4	1200.65	ZFAND6
ENSG00000086696	-0.0785311	0.908065	0.99966	22.8588	9.32098	19.4669	14.7319	HSD17B2
ENSG00000086712	-0.0747823	0.66571	0.99966	517.441	547.608	543.304	578.228	TXLNG
ENSG00000086730	-0.173197	0.773119	0.99966	27.015	12.8163	20.3518	24.8601	LAT2
ENSG00000086758	-0.238544	0.122075	0.99966	8140.86	10144.7	10309.5	11262.6	HUWE1
ENSG00000086827	-0.0838112	0.696144	0.99966	223.393	223.704	235.373	238.473	ZW10
ENSG00000086848	0.101141	0.768092	0.99966	67.5374	97.8703	63.71	90.2331	ALG9
ENSG00000087008	0.184232	0.518981	0.99966	122.606	118.843	91.1406	121.538	ACOX3
ENSG00000087053	0.0241663	0.902217	0.99966	315.867	311.088	301.737	314.895	MTMR2
ENSG00000087074	-0.163155	0.299296	0.99966	2366.93	1991.19	2590.87	2289.9	PPP1R15A
ENSG00000087077	-0.251491	0.102492	0.99966	1846.37	1633.5	1947.58	2195.98	TRIP6
ENSG00000087085	-0.233789	0.241237	0.99966	318.984	316.913	409.69	337.914	ACHE
ENSG00000087086	-0.096551	0.537778	0.99966	1909.75	1741.86	1787.42	2117.72	FTL
ENSG00000087087	-0.184745	0.254301	0.99966	1866.11	1561.26	2093.58	1802.82	SRRT
ENSG00000087088	-0.259772	0.216236	0.99966	466.528	319.244	472.516	469.58	BAX
ENSG00000087095	0.178795	0.488929	0.99966	137.153	156.126	133.614	125.221	NLK
ENSG00000087111	-0.13283	0.401117	0.99966	848.893	875.007	913.176	976.911	PIGS
ENSG00000087116	0.155246	0.843893	0.99966	10.3904	12.8163	8.84861	11.9697	ADAMTS2
ENSG00000087128	0.271471	0.131885	0.99966	4269.4	6118.06	4010.19	4594.52	TMPRSS11E
ENSG00000087152	-0.192795	0.220426	0.99966	867.596	871.512	1028.21	959.417	ATXN7L3
ENSG00000087157	0.0285744	0.891981	0.99966	285.735	278.464	249.531	303.846	PGS1
ENSG00000087191	-0.11928	0.445367	0.99966	1885.85	1564.76	1889.18	1859.91	PSMC5
ENSG00000087206	-0.0816223	0.697742	0.99966	240.018	244.676	248.646	264.254	UIMC1
ENSG00000087245	-0.0485414	0.822487	0.99966	553.807	417.114	586.663	418.019	MMP2
ENSG00000087253	0.177059	0.284856	0.99966	873.83	1029.97	861.854	821.305	LPCAT2
ENSG00000087258	0.190798	0.27656	0.99966	632.774	630.331	597.281	509.172	GNAO1
ENSG00000087263	-0.148257	0.440725	0.99966	314.828	342.546	366.332	361.853	OGFOD1
ENSG00000087266	0.24371	0.119057	0.99966	1231.26	1409.8	1114.92	1115.02	SH3BP2
ENSG00000087269	-0.146024	0.382078	0.99966	636.93	619.845	667.185	723.706	NOP14
ENSG00000087274	-0.0145109	0.922574	0.99966	1778.83	1790.79	1697.16	1908.71	ADD1
ENSG00000087299	-0.0679957	0.768218	0.99966	196.378	181.759	185.821	210.851	L2HGDH
ENSG00000087301	0.266899	0.258126	0.99966	198.456	243.511	167.239	199.802	TXNDC16
ENSG00000087302	0.0162124	0.919885	0.99966	1127.36	999.675	996.353	1107.66	RTRAF
ENSG00000087338	0.0917755	0.648587	0.99966	295.087	337.886	304.392	289.114	GMCL1
ENSG00000087365	-0.128987	0.360632	0.99966	2484.34	2378.02	2629.81	2687.66	SF3B2
ENSG00000087448	-0.067692	0.761585	0.99966	209.886	200.401	225.639	204.406	KLHL42
ENSG00000087460	0.0712957	0.641415	0.99966	7463.41	5978.24	6355.95	6438.78	GNAS
ENSG00000087470	-0.136538	0.407808	0.99966	646.281	696.743	725.586	750.408	DNM1L
ENSG00000087494	0.00576309	0.968976	0.99966	1736.23	1614.86	1716.63	1621.43	PTHLH
ENSG00000087495	0.216121	0.66077	0.99966	30.1321	33.7886	30.0853	24.8601	PHACTR3
ENSG00000087502	0.134813	0.425475	0.99966	613.032	629.166	551.268	580.07	ERGIC2
ENSG00000087510	-0.0205861	0.895832	0.99966	911.236	872.677	894.594	915.221	TFAP2C
ENSG00000087586	0.0622954	0.737919	0.99966	1189.7	951.905	889.285	1162.9	AURKA
ENSG00000087842	0.109671	0.585021	0.99966	524.714	415.949	390.224	482.471	PIR
ENSG00000087903	-0.0948444	0.712655	0.99966	174.558	128.163	163.699	160.21	RFX2
ENSG00000087995	0.0289558	0.897027	0.99966	304.438	245.841	237.143	302.925	METTL2A
ENSG00000088002	0.189902	0.727217	0.99966	25.9759	24.4676	21.2367	23.0186	SULT2B1
ENSG00000088035	0.272379	0.163201	0.99966	350.156	362.353	306.162	283.59	ALG6
ENSG00000088038	-0.0592913	0.734308	0.99966	546.534	511.489	528.262	574.545	CNOT3
ENSG00000088179	-0.173162	0.516487	0.99966	126.763	188.75	195.554	159.289	PTPN4
ENSG00000088205	-0.0220495	0.890872	0.99966	796.942	863.356	826.46	859.056	DDX18
ENSG00000088247	-0.182961	0.211621	0.99966	2104.05	1958.57	2211.27	2401.31	KHSRP
ENSG00000088256	-0.177254	0.29607	0.99966	993.32	805.1	1052.98	981.515	GNA11
ENSG00000088280	0.127097	0.504105	0.99966	462.372	417.114	435.351	370.14	ASAP3
ENSG00000088305	0.249957	0.302132	0.99966	195.339	181.759	143.347	174.021	DNMT3B
ENSG00000088325	0.051676	0.76145	0.99966	3346.74	2514.33	2653.7	3002.55	TPX2
[truncated: 14,141 more rows]

## Sheet: Table S2
	Gene	Forward	Reverse	REF
	ADAMTS1	CGGAAGTGACCTCCAATGCT	CTGCTCGGATCACACACAGT	1
	AMOT	CATGGAGGGCAGGATTAAGACC	CGACAGCTGCTCTGTCTTGCT	2
	ANGPTL4	GTTTGCAGACTCAGCTCAAGG	CCAAGAGGTCTATCTGGCTCTG	3
	CALB1	AAGATCCGTTCGGTACAGCTT	CTGAAGGATCTGTGCGAGAA	4
	CFH	GCTTTGAAAATGCCATACCC	GGCCCACATTTTCCTGTAGA	5
	FLNC	AGTGGCGTCAAGGTCTCAGG	GCGGTGTACTGCACTCGGTA	6
	GAPDH	GGTGAAGGTCGGTGTGAACG	CTCGCTCCTGGAAGATGGTG	self designed
	GJA1	TCCTTTGACTTCAGCCTCCA	CCATGTCTGGGCACCTCT	7
	IZUMO4	CAACAACTGCACAGACTCGC	TTAAGGCTGGCGATACCAGG	self designed
	KLK5	GTGGGTGCTCTGTGCTCTGA	TCCTGGTTGCTCCCAGAGG	8
	KRT84	CCAACGTGGATACCCTAACT	CTCTGAGATGTGCGACTGC	self designed
	MMP13	AACATCCAAAAACGCCAGAC	GGAAGTTCTGGCCAAAATGA	9
	OLFM4	AGCTCTTTCCCAGGTGTTGA	AAGCGTTCCACTCTGTCCAC	10
	POLR2A	GCAAATTCACCAAGAGAGAC	CACGTCGACAGGAACATCAG	11
	TFPI2	CAGGAGCCAACAGGAAATAAC	GAATACGACCCCAAGAAATGA	12
	References
	1. Lee, H. C.; C. Y. Chang; Y. C. Huang; K. L. Wu; H. H. Chiang; Y. Y. Chang; L. X. Liu; J. Y. Hung; Y. L. Hsu; Y. Y. Wu; Y. M. Tsai. Downregulated ADAMTS1 Incorporating A2M Contributes to Tumorigenesis and Alters Tumor Immune Microenvironment in Lung Adenocarcinoma. Biology. (Basel) 2022, 11.
	2. Hakami, F.; L. Darda; P. Stafford; P. Woll; D. W. Lambert; K. D. Hunter. The roles of HOXD10 in the development and progression of head and neck squamous cell carcinoma (HNSCC). Br. J Cancer 2014, 111, 807-816.
	3. Catoire, M.; S. Alex; N. Paraskevopulos; F. Mattijssen; G. Evers-van, I; G. Schaart; J. Jeppesen; A. Kneppers; M. Mensink; P. J. Voshol; G. Olivecrona; N. S. Tan; M. K. Hesselink; J. F. BerbÃ©e; P. C. Rensen; E. Kalkhoven; P. Schrauwen; S. Kersten. Fatty acid-inducible ANGPTL4 governs lipid metabolic response to exercise. Proc. Natl. Acad. Sci. U. S. A 2014, 111, E1043-E1052.
	4. Raynard, C.; N. Tessier; A. Huna; M. Warnier; J. M. Flaman; C. F. Van; S. Ducreux; N. Martin; D. Bernard. Expression of the Calcium-Binding Protein CALB1 Is Induced and Controls Intracellular Ca(2+) Levels in Senescent Cells. Int. J Mol. Sci. 2022, 23.
	5. Kajiwara, Y.; E. Wang; M. Wang; W. C. Sin; K. J. Brennand; E. Schadt; C. C. Naus; J. Buxbaum; B. Zhang. GJA1 (connexin43) is a key regulator of Alzheimer's disease pathogenesis. Acta Neuropathol. Commun. 2018, 6, 144.
	6. Kamil, M.; Y. Shinsato; N. Higa; T. Hirano; M. Idogawa; T. Takajo; K. Minami; M. Shimokawa; M. Yamamoto; K. Kawahara; H. Yonezawa; H. Hirano; T. Furukawa; K. Yoshimoto; K. Arita. High filamin-C expression predicts enhanced invasiveness and poor outcome in glioblastoma multiforme. Br. J Cancer 2019, 120, 819-826.
	7. Kajiwara, Y.; E. Wang; M. Wang; W. C. Sin; K. J. Brennand; E. Schadt; C. C. Naus; J. Buxbaum; B. Zhang. GJA1 (connexin43) is a key regulator of Alzheimer's disease pathogenesis. Acta Neuropathol. Commun. 2018, 6, 144.
	8. Alves, M. G.; M. H. Kodama; E. Z. M. da Silva; B. B. M. Gomes; R. A. A. da Silva; G. V. Vieira; V. M. Alves; C. K. da Fonseca; A. C. Santana; N. T. CecÃ­lio; M. S. A. Costa; M. C. Jamur; C. Oliver; T. M. Cunha; T. H. Bugge; P. H. Braz-Silva; L. M. Colli; K. U. Sales. Relative expression of KLK5 to LEKTI is associated with aggressiveness of oral squamous cell carcinoma. Transl. Oncol. 2021, 14,…
	9. Gibson, S. V.; B. E. Tomas; L. RodrÃ­guez-FernÃ¡ndez; M. D. Allen; J. J. Gomm; I. Goulding; K. U. Auf dem; A. Agnoletto; C. Brisken; B. Peck; A. J. Cameron; J. F. Marshall; J. L. Jones; E. P. Carter; R. P. Grose. TGFÎ²-mediated MMP13 secretion drives myoepithelial cell dependent breast cancer progression. NPJ. Breast Cancer 2023, 9, 9.
	10. Liu, R. H.; M. H. Yang; H. Xiang; L. M. Bao; H. A. Yang; L. W. Yue; X. Jiang; N. Ang; L. Y. Wu; Y. Huang. Depletion of OLFM4 gene inhibits cell growth and increases sensitization to hydrogen peroxide and tumor necrosis factor-alpha induced-apoptosis in gastric cancer cells. J Biomed. Sci. 2012, 19, 38.
	11. Ahmad, U. S.; E. K. Parkinson; H. Wan. Desmoglein-3 induces YAP phosphorylation and inactivation during collective migration of oral carcinoma cells. Mol. Oncol. 2022, 16, 1625-1649.
	12. Ran, Y.; J. Pan; H. Hu; Z. Zhou; L. Sun; L. Peng; L. Yu; L. Sun; J. Liu; Z. Yang. A novel role for tissue factor pathway inhibitor-2 in the therapy of human esophageal carcinoma. Hum. Gene Ther. 2009, 20, 41-49.

## Sheet: Table S3
	GeneID	Gene Name	Log2fold change	p value	p adjusted
	ENSG00000102837	OLFM4	1.74	2.1e-08	4.85e-05
	ENSG00000126016	AMOT	1.58	1.63e-05	0.0138391
	ENSG00000000971	CFH	1.43	1.07e-05	0.0101289
	ENSG00000152661	GJA1	1.42	1.04e-06	0.00133501
	ENSG00000137745	MMP13	1.21	7.6e-09	2.05e-05
	ENSG00000099840	IZUMO4	1.15	5.62e-05	0.0335656
	ENSG00000167772	ANGPTL4	1.1	5.2e-09	1.68e-05
	ENSG00000104327	CALB1	1.05	2.86e-12	4.61e-08
	NSG00000105825	TFPI2	1.03	4.62e-09	1.68e-05
	ENSG00000167754	KLK5	-1.02	1.09e-10	8.8e-07
	ENSG00000154734	ADAMTS1	-1.08	4.37e-05	0.0280394
	ENSG00000128591	FLNC	-1.15	7.88e-10	4.24e-06

## Sheet: Table S4
Feature ID	P-value (D3 vs Vect)	FDR step up (D3 vs Vect)	Ratio (D3 vs Vect)	Log2(Ratio) (D3 vs Vect)	Fold change (D3 vs Vect)	LSMean(D3) (D3 vs Vect)	LSMean(Vect) (D3 vs Vect)
CALB1	3.44447e-12	5.43607e-08	2.06913	1.04903	2.06913	1819.56	879.384
TFPI2	5.10968e-09	1.88704e-05	2.03698	1.02644	2.03698	1080.53	530.457
ANGPTL4	5.97845e-09	1.88704e-05	2.1445	1.10064	2.1445	754.844	351.991
MMP13	9.25493e-09	2.43435e-05	2.31692	1.21221	2.31692	388.029	167.477
OLFM4	3.06424e-08	6.90854e-05	3.34114	1.74034	3.34114	144.165	43.1485
GJA1	1.39881e-06	0.00158982	2.67918	1.42179	2.67918	183.045	68.3215
CFH	1.25265e-05	0.0116291	2.6963	1.43098	2.6963	152.151	56.4295
AMOT	1.97805e-05	0.0154299	2.9887	1.57952	2.9887	94.0031	31.4528
IZUMO4	6.36053e-05	0.0371785	2.22148	1.15152	2.22148	156.514	70.4547
CA9	0.00039767	0.160924	2.8625	1.51728	2.8625	89.0271	31.1011
CYP4F23P	0.00152257	0.378891	2.11246	1.07892	2.11246	146.254	69.2339
ARNT2	0.0019719	0.404226	2.01043	1.0075	2.01043	110.619	55.0228
RHCG	0.00461583	0.714186	3.11294	1.63828	3.11294	36.5748	11.7493
KLHL4	0.00501864	0.740226	2.56777	1.36052	2.56777	56.4383	21.9795
TMC1	0.00697131	0.821054	2.36012	1.23886	2.36012	72.3198	30.6424
PPFIA4	0.0114312	0.999754	2.22024	1.15072	2.22024	50.9162	22.9327
AC138646.1	0.0119011	0.999754	2.4339	1.28327	2.4339	44.9543	18.47
LUCAT1	0.0137973	0.999754	2.06959	1.04934	2.06959	67.6103	32.6685
GPR85	0.0168616	0.999754	2.21083	1.14459	2.21083	48.6718	22.0152
VIT	0.0181356	0.999754	2.3195	1.21381	2.3195	46.6008	20.0909
TMEM71	0.0182006	0.999754	2.57379	1.36389	2.57379	34.5038	13.4058
ARHGAP20	0.0200452	0.999754	2.33795	1.22524	2.33795	41.0786	17.5704
CDH11	0.0232746	0.999754	2.0186	1.01336	2.0186	57.2246	28.3486
GXYLT2	0.0270245	0.999754	2.31878	1.21336	2.31878	37.7988	16.3012
ACSM3	0.0287079	0.999754	2.37399	1.24731	2.37399	34.3001	14.4483
PCDHB16	0.0291809	0.999754	2.32792	1.21904	2.32792	33.4682	14.3769
MIR1244-2	0.0314415	0.999754	2.11638	1.0816	2.11638	40.8426	19.2983
C5orf63	0.0315101	0.999754	2.44188	1.28799	2.44188	29.5926	12.1188
KLRK1	0.0318306	0.999754	2.31345	1.21005	2.31345	34.3629	14.8535
PCDH18	0.0346555	0.999754	3.22375	1.68874	3.22375	18.9384	5.87465
ARHGEF6	0.0367845	0.999754	2.0289	1.0207	2.0289	42.9136	21.1512
C2CD4A	0.0399502	0.999754	3.01858	1.59387	3.01858	19.064	6.31556
LINC01546	0.0410627	0.999754	2.23682	1.16145	2.23682	32.1186	14.3591
TSPAN8	0.0438202	0.999754	2.9948	1.58246	2.9948	18.8604	6.29771
ACBD7	0.0449669	0.999754	2.41605	1.27265	2.41605	27.1922	11.2548
ZNF812P	0.0469072	0.999754	2.55867	1.35539	2.55867	23.0653	9.01457
ARHGAP28	0.049538	0.999754	2.72942	1.44859	2.72942	20.9943	7.69184

## Sheet: Talbe S5
Feature ID	P-value (D3 vs Vect)	FDR step up (D3 vs Vect)	Ratio (D3 vs Vect)	Log2(Ratio) (D3 vs Vect)	Fold change (D3 vs Vect)	LSMean(D3) (D3 vs Vect)	LSMean(Vect) (D3 vs Vect)
KLK5	1.09489e-10	8.63978e-07	0.492958	-1.02046	-2.02857	649.122	1316.79
FLNC	8.28524e-10	4.35859e-06	0.452252	-1.1448	-2.21116	291.377	644.28
ADAMTS1	4.41378e-05	0.0288621	0.472571	-1.0814	-2.11608	90.1903	190.85
TRHDE	0.000549596	0.206517	0.45273	-1.14328	-2.20882	63.5482	140.367
KRT84	0.000636047	0.21822	0.222371	-2.16896	-4.497	7.68845	34.5749
HNRNPUL2-BSCL2	0.00710297	0.821982	0.458447	-1.12517	-2.18128	29.3413	64.0016
TRHDE-AS1	0.0118072	0.999754	0.407206	-1.29617	-2.45576	19.5038	47.8967
AC083899.1	0.0183085	0.999754	0.272618	-1.87505	-3.66814	5.49175	20.1445
IGFN1	0.0185899	0.999754	0.47513	-1.07361	-2.10469	23.9124	50.3281
PRDM13	0.0221409	0.999754	0.374857	-1.41559	-2.66768	11.1091	29.6356
NSG2	0.0229944	0.999754	0.25215	-1.98765	-3.9659	4.51905	17.9221
ANKRD1	0.0345168	0.999754	0.476805	-1.06853	-2.09729	19.2525	40.3782
KRT6C	0.0354105	0.999754	0.456279	-1.13201	-2.19164	19.7855	43.3626
SALL3	0.040057	0.999754	0.3229	-1.63084	-3.09694	5.94669	18.4165
KRTDAP	0.0427712	0.999754	0.399217	-1.32475	-2.5049	10.7322	26.8831
NHSL2	0.0463835	0.999754	0.452171	-1.14506	-2.21155	14.2785	31.5777
TCF15	0.0491949	0.999754	0.414888	-1.26921	-2.41029	10.795	26.0191
GADD45G	0.0494804	0.999754	0.483255	-1.04914	-2.0693	16.9302	35.0337

## Sheet: Table S6
Genes	Process_name	Significant_genes_count	Total_genes_group_count	Percent_significant_genes	P-value	Padj-value
GJA1;	GO:0007165~signal transduction	1	1073	0.0931966	0.207332	0.207332
GJA1;	GO:0006915~apoptotic process	1	530	0.188679	0.108023	0.108902
MMP13; ADAMTS1; KLK5;	GO:0006508~proteolysis	3	508	0.590551	0.0001562	0.00698481
OLFM4;	GO:0007155~cell adhesion	1	452	0.221239	0.0928567	0.0943789
ANGPTL4;	GO:0030154~cell differentiation	1	449	0.222717	0.0922686	0.0943789
ANGPTL4;	GO:0043066~negative regulation of apoptotic process	1	445	0.224719	0.0914841	0.0943789
ADAMTS1;	GO:0008285~negative regulation of cell proliferation	1	377	0.265252	0.0780508	0.0813302
GJA1;	GO:0007267~cell-cell signaling	1	298	0.33557	0.062216	0.0653795
GJA1;	GO:0006810~transport	1	295	0.338983	0.0616098	0.0652958
GJA1;	GO:0010628~positive regulation of gene expression	1	250	0.4	0.0524735	0.0560923
ANGPTL4;	GO:0001525~angiogenesis	1	215	0.465116	0.0453112	0.0488573
GJA1;	GO:0034220~ion transmembrane transport	1	208	0.480769	0.0438728	0.0477212
OLFM4;	GO:0042981~regulation of apoptotic process	1	189	0.529101	0.0399585	0.0438483
GJA1; AMOT;	GO:0001701~in utero embryonic development	2	180	1.11111	0.000678321	0.00698481
OLFM4; ANGPTL4;	GO:0051260~protein homooligomerization	2	172	1.16279	0.000620432	0.00698481
GJA1;	GO:0007507~heart development	1	172	0.581395	0.0364438	0.0403485
TFPI2;	GO:0007596~blood coagulation	1	169	0.591716	0.0358224	0.0400178
ANGPTL4;	GO:0001666~response to hypoxia	1	158	0.632911	0.0335405	0.0378093
GJA1;	GO:0043123~positive regulation of I-kappaB kinase/NF-kappaB signaling	1	157	0.636943	0.0333329	0.0378093
AMOT;	GO:0051056~regulation of small GTPase mediated signal transduction	1	134	0.746269	0.0285448	0.0327737
GJA1;	GO:0007204~positive regulation of cytosolic calcium ion concentration	1	133	0.75188	0.0283361	0.0327737
GJA1;	GO:0010629~negative regulation of gene expression	1	131	0.763359	0.0279187	0.0326596
TFPI2;	GO:0010951~negative regulation of endopeptidase activity	1	124	0.806452	0.0264563	0.0312436
AMOT;	GO:0030036~actin cytoskeleton organization	1	123	0.813008	0.0262472	0.0312436
AMOT;	GO:0006935~chemotaxis	1	117	0.854701	0.0249919	0.0300873
GJA1;	GO:0030308~negative regulation of cell growth	1	116	0.862069	0.0247825	0.0300873
ANGPTL4;	GO:0045766~positive regulation of angiogenesis	1	109	0.917431	0.0233158	0.0286253
GJA1;	GO:0001649~osteoblast differentiation	1	101	0.990099	0.021637	0.0268299
GJA1;	GO:0006936~muscle contraction	1	101	0.990099	0.021637	0.0268299
GJA1;	GO:0001764~neuron migration	1	100	1	0.021427	0.0268299
MMP13;	GO:0044267~cellular protein metabolic process	1	93	1.07527	0.0199556	0.0255103
CFH;	GO:0006956~complement activation	1	87	1.14943	0.0186929	0.0241449
ADAMTS1;	GO:0001822~kidney development	1	85	1.17647	0.0182716	0.0238493
ADAMTS1;	GO:0007229~integrin-mediated signaling pathway	1	83	1.20482	0.0178502	0.0235471
CALB1;	GO:0007626~locomotory behavior	1	82	1.21951	0.0176394	0.0235192
KLK5;	GO:0008544~epidermis development	1	80	1.25	0.0172177	0.0232065
MMP13;	GO:0022617~extracellular matrix disassembly	1	74	1.35135	0.0159517	0.0217364
GJA1;	GO:0071260~cellular response to mechanical stimulus	1	71	1.40845	0.0153182	0.021105
AMOT;	GO:0030334~regulation of cell migration	1	67	1.49254	0.0144728	0.0201644
GJA1;	GO:0009749~response to glucose	1	66	1.51515	0.0142614	0.0200956
MMP13;	GO:0030574~collagen catabolic process	1	64	1.5625	0.0138384	0.0197237
GJA1;	GO:0001947~heart looping	1	58	1.72414	0.0125684	0.0181219
AMOT;	GO:0016525~negative regulation of angiogenesis	1	58	1.72414	0.0125684	0.0181219
GJA1;	GO:0045669~positive regulation of osteoblast differentiation	1	58	1.72414	0.0125684	0.0181219
GJA1;	GO:0045732~positive regulation of protein catabolic process	1	57	1.75439	0.0123566	0.0181219
GJA1;	GO:0042733~embryonic digit morphogenesis	1	56	1.78571	0.0121447	0.0181219
AMOT;	GO:0001570~vasculogenesis	1	55	1.81818	0.0119328	0.0181219
GJA1;	GO:0051259~protein oligomerization	1	55	1.81818	0.0119328	0.0181219
GJA1;	GO:0048812~neuron projection morphogenesis	1	47	2.12766	0.0102362	0.0160669
GJA1;	GO:0032024~positive regulation of insulin secretion	1	41	2.43902	0.00896193	0.0142472
AMOT;	GO:0034260~negative regulation of GTPase activity	1	41	2.43902	0.00896193	0.0142472
AMOT;	GO:0034613~cellular protein localization	1	40	2.5	0.00874941	0.0142472
GJA1;	GO:0043434~response to peptide hormone	1	40	2.5	0.00874941	0.0142472
MMP13;	GO:0030282~bone mineralization	1	35	2.85714	0.00768618	0.0128795
GJA1;	GO:0002088~lens development in camera-type eye	1	32	3.125	0.00704774	0.0119715
CALB1;	GO:0051480~regulation of cytosolic calcium ion concentration	1	32	3.125	0.00704774	0.0119715
OLFM4;	GO:1900026~positive regulation of substrate adhesion-dependent cell spreading	1	32	3.125	0.00704774	0.0119715
GJA1;	GO:0045907~positive regulation of vasoconstriction	1	31	3.22581	0.00683484	0.0119715
CALB1;	GO:0048167~regulation of synaptic plasticity	1	31	3.22581	0.00683484	0.0119715
CALB1;	GO:0007616~long-term memory	1	29	3.44828	0.00640892	0.0116869
CFH;	GO:0030449~regulation of complement activation	1	29	3.44828	0.00640892	0.0116869
GJA1;	GO:0045909~positive regulation of vasodilation	1	29	3.44828	0.00640892	0.0116869
GJA1;	GO:0001937~negative regulation of endothelial cell proliferation	1	28	3.57143	0.0061959	0.0116869
ANGPTL4;	GO:2000352~negative regulation of endothelial cell apoptotic process	1	28	3.57143	0.0061959	0.0116869
AMOT;	GO:0035329~hippo signaling	1	27	3.7037	0.00598283	0.0116869
MMP13;	GO:0001958~endochondral ossification	1	26	3.84615	0.00576973	0.0115395
ANGPTL4;	GO:0070328~triglyceride homeostasis	1	26	3.84615	0.00576973	0.0115395
MMP13;	GO:0060349~bone morphogenesis	1	25	4	0.00555658	0.0114836
GJA1;	GO:0051924~regulation of calcium ion transport	1	24	4.16667	0.00534339	0.0112302
CALB1;	GO:0010842~retina layer formation	1	22	4.54545	0.00491688	0.010512
GJA1;	GO:0048514~blood vessel morphogenesis	1	18	5.55556	0.00406337	0.00883961
AMOT;	GO:0001702~gastrulation with mouth forming second	1	17	5.88235	0.00384988	0.00852475
GJA1;	GO:0030500~regulation of bone mineralization	1	17	5.88235	0.00384988	0.00852475
GJA1;	GO:0060307~regulation of ventricular cardiac muscle cell membrane repolarization	1	17	5.88235	0.00384988	0.00852475
GJA1;	GO:0043403~skeletal muscle tissue regeneration	1	16	6.25	0.00363636	0.00850771
CALB1;	GO:0071310~cellular response to organic substance	1	16	6.25	0.00363636	0.00850771
ADAMTS1;	GO:0060347~heart trabecula formation	1	15	6.66667	0.00342279	0.00832208
CFH;	GO:0006957~complement activation, alternative pathway	1	13	7.69231	0.00299553	0.00742892
GJA1;	GO:0007512~adult heart development	1	13	7.69231	0.00299553	0.00742892
GJA1;	GO:0086064~cell communication by electrical coupling involved in cardiac conduction	1	13	7.69231	0.00299553	0.00742892
OLFM4;	GO:0010939~regulation of necrotic cell death	1	12	8.33333	0.00278184	0.00733932
FLNC;	GO:0034329~cell junction assembly	1	12	8.33333	0.00278184	0.00733932
FLNC;	GO:0048747~muscle fiber development	1	12	8.33333	0.00278184	0.00733932
GJA1;	GO:2000279~negative regulation of DNA biosynthetic process	1	12	8.33333	0.00278184	0.00733932
GJA1;	GO:0009268~response to pH	1	11	9.09091	0.0025681	0.00733932
KLK5;	GO:0045745~positive regulation of G-protein coupled receptor protein signaling pathway	1	11	9.09091	0.0025681	0.00733932
GJA1;	GO:0061045~negative regulation of wound healing	1	11	9.09091	0.0025681	0.00733932
TFPI2;	GO:0071498~cellular response to fluid shear stress	1	11	9.09091	0.0025681	0.00733932
GJA1;	GO:0060044~negative regulation of cardiac muscle cell proliferation	1	10	10	0.00235432	0.00733932
CALB1;	GO:0007614~short-term memory	1	9	11.1111	0.00214051	0.00698481
GJA1;	GO:0034405~response to fluid shear stress	1	9	11.1111	0.00214051	0.00698481
AMOT;	GO:0040019~positive regulation of embryonic development	1	9	11.1111	0.00214051	0.00698481
AMOT;	GO:0043534~blood vessel endothelial cell migration	1	9	11.1111	0.00214051	0.00698481
OLFM4;	GO:0050764~regulation of phagocytosis	1	9	11.1111	0.00214051	0.00698481
GJA1;	GO:0086014~atrial cardiac muscle cell action potential	1	9	11.1111	0.00214051	0.00698481
GJA1;	GO:2000810~regulation of bicellular tight junction assembly	1	9	11.1111	0.00214051	0.00698481
GJA1;	GO:0002544~chronic inflammatory response	1	8	12.5	0.00192664	0.00698481
GJA1;	GO:0016264~gap junction assembly	1	8	12.5	0.00192664	0.00698481
AMOT;	GO:0042074~cell migration involved in gastrulation	1	8	12.5	0.00192664	0.00698481
GJA1;	GO:0060371~regulation of atrial cardiac muscle cell membrane depolarization	1	8	12.5	0.00192664	0.00698481
ADAMTS1;	GO:0001542~ovulation from ovarian follicle	1	7	14.2857	0.00171274	0.00698481
GJA1;	GO:0046850~regulation of bone remodeling	1	7	14.2857	0.00171274	0.00698481
GJA1;	GO:0060373~regulation of ventricular cardiac muscle cell membrane depolarization	1	7	14.2857	0.00171274	0.00698481
CALB1;	GO:0072205~metanephric collecting duct development	1	7	14.2857	0.00171274	0.00698481
GJA1;	GO:0003158~endothelium development	1	6	16.6667	0.0014988	0.00698481
GJA1;	GO:0015867~ATP transport	1	6	16.6667	0.0014988	0.00698481
MMP13;	GO:0003417~growth plate cartilage development	1	5	20	0.00128481	0.00698481
ANGPTL4;	GO:0051005~negative regulation of lipoprotein lipase activity	1	5	20	0.00128481	0.00698481
GJA1;	GO:2000987~positive regulation of behavioral fear response	1	5	20	0.00128481	0.00698481
GJA1;	GO:0002070~epithelial cell maturation	1	4	25	0.00107078	0.00698481
GJA1;	GO:0003104~positive regulation of glomerular filtration	1	4	25	0.00107078	0.00698481
CALB1;	GO:0035502~metanephric part of ureteric bud development	1	4	25	0.00107078	0.00698481
CALB1;	GO:0072221~metanephric distal convoluted tubule development	1	4	25	0.00107078	0.00698481
KLK5;	GO:0002803~positive regulation of antibacterial peptide production	1	3	33.3333	0.000856707	0.00698481
GJA1;	GO:0010643~cell communication by chemical coupling	1	3	33.3333	0.000856707	0.00698481
GJA1;	GO:0010644~cell communication by electrical coupling	1	3	33.3333	0.000856707	0.00698481
GJA1;	GO:0003294~atrial ventricular junction remodeling	1	2	50	0.000642593	0.00698481
AMOT;	GO:0003365~establishment of cell polarity involved in ameboidal cell migration	1	2	50	0.000642593	0.00698481
GJA1;	GO:0010652~positive regulation of cell communication by chemical coupling	1	2	50	0.000642593	0.00698481
GJA1;	GO:0045844~positive regulation of striated muscle tissue development	1	2	50	0.000642593	0.00698481
GJA1;	GO:0010232~vascular transport	1	1	100	0.000428438	0.00698481
GJA1;	GO:0060156~milk ejection reflex	1	1	100	0.000428438	0.00698481
CALB1;	GO:0072286~metanephric connecting tubule development	1	1	100	0.000428438	0.00698481
OLFM4;	GO:2000389~regulation of neutrophil extravasation	1	1	100	0.000428438	0.00698481
